# Supplementary material
Source: publisher site journal article supplement (https://www.dovepress.com/article/352336)
Supplement: Supplementary file 1 [file get_supplementary_file.php]

# Targeting CXCL12/CXCR4 Signaling with AMD3100 Might Selectively Suppress CXCR4+ T Cell Chemotaxis Leading to the Alleviation of Chronic Prostatitis

**Running title:** AMD3100 alleviates chronic prostatitis

Meng Zhang<sup>1,2,3,#</sup>, Yi Liu<sup>1,2,3,#</sup>, Jing Chen<sup>1,2,3,#</sup>, Lei Chen<sup>1,2,3</sup>, Li Zhang<sup>1,2,3</sup>, Xianguo Chen<sup>1,2,3</sup>, Zongyao Hao<sup>1,2,3,\*</sup>, Chaozhao Liang<sup>1,2,3,\*</sup>

<sup>1</sup>Department of Urology, The First Affiliated Hospital of Anhui Medical University, Hefei 230022, Anhui, People's Republic of China.

<sup>2</sup>Institute of Urology, Anhui Medical University, Hefei 230022, Anhui, People's Republic of China.

<sup>3</sup>Anhui Province Key Laboratory of Genitourinary Diseases, Anhui Medical University, Hefei 230022, Anhui, People's Republic of China.

#These authors contributed equally to the work.

\*Correspondence to Zongyao Hao ([haozongyao@163.com](mailto:haozongyao@163.com)) & Chaozhao Liang ([liang\\_chaozhao@ahmu.edu.cn](mailto:liang_chaozhao@ahmu.edu.cn)).

**Tel.:** +86 55162923095, and **Fax.:** +86 55162923095

**Address:** Jixi Road 218, Shushan District, Hefei City 230022, Anhui, People's Republic of China.

**Supplementary files:** Supplementary Figure 1-8 & Supplementary Table 1-7

A

NOD/ShiLtJ Mice

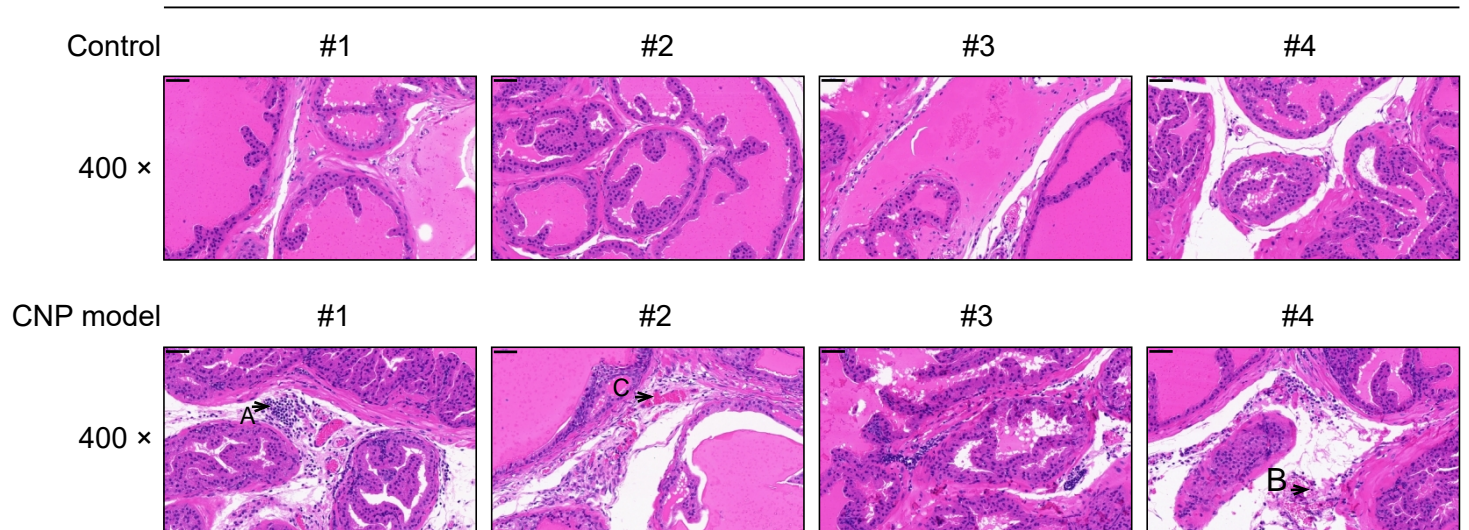

B

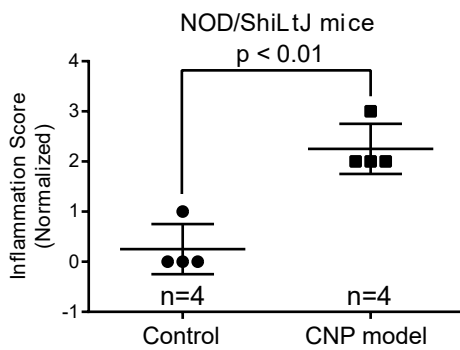

**Supplementary Figure S1.** Hematoxylin and eosin (HE) staining of the prostate tissues derived from chronic nonbacteria prostatitis (CNP) mice models and negative controls. A. Inflammatory cell infiltration (arrow A, T cells; arrow B, neutrophils) and vascular congestion (arrow C) were observed in the CNP group; B. Quantification of inflammation scores between mice models and negative controls. Note: The scale bar is 50  $\mu$ m. Each group contained four mice.

A

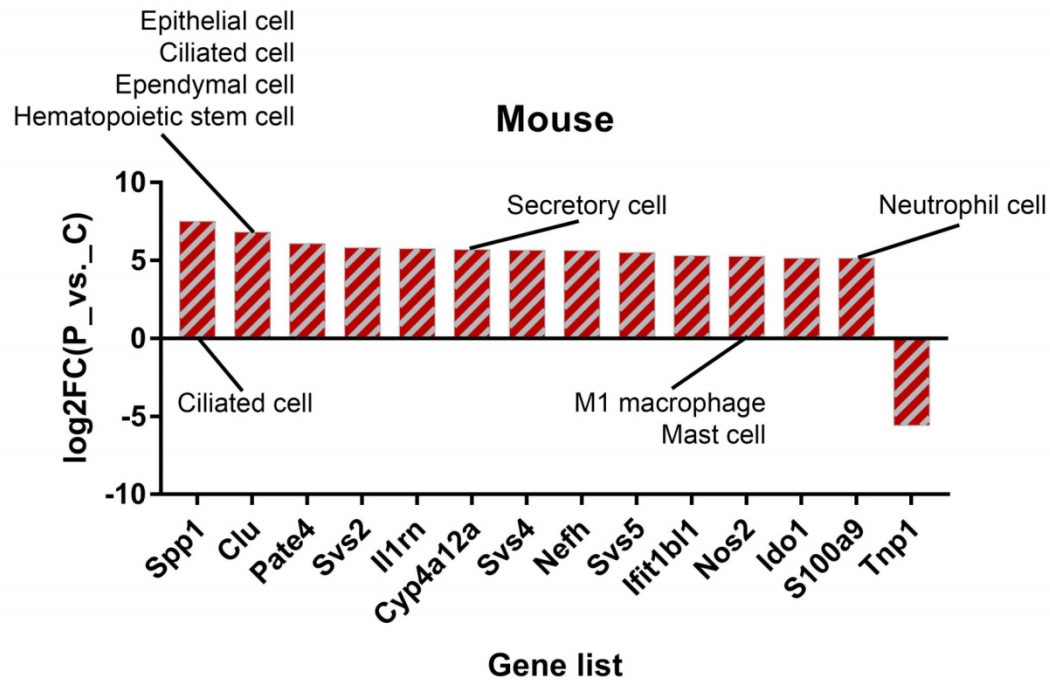

B

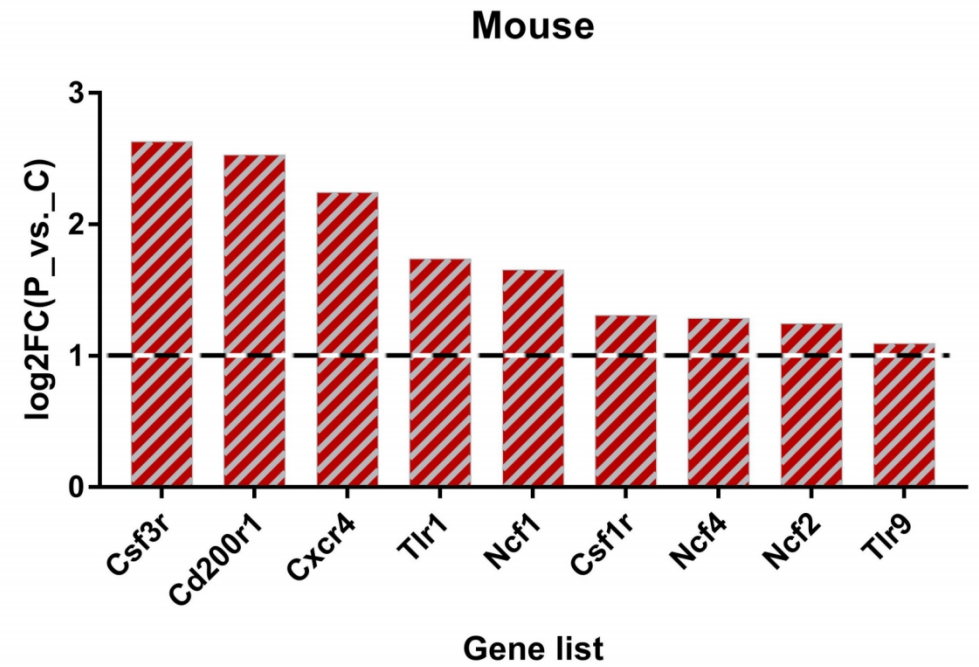

C

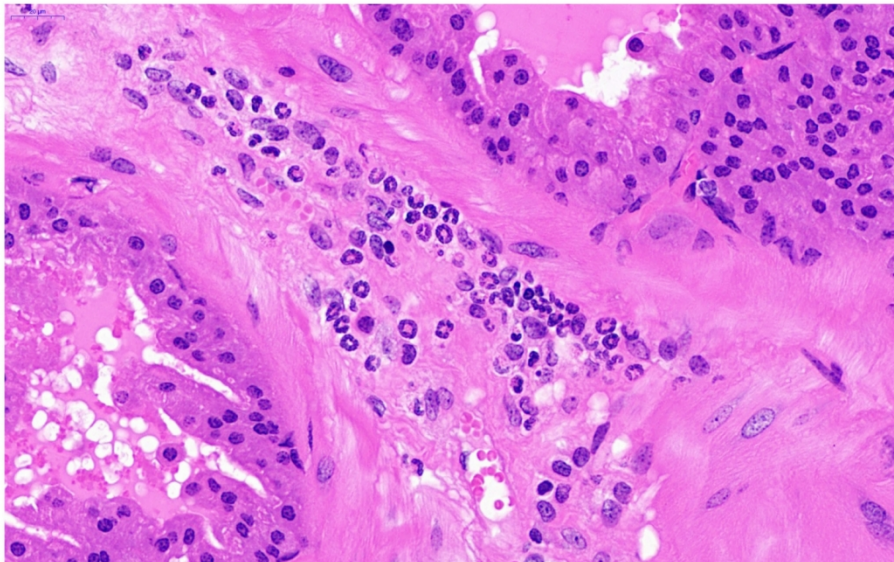

D

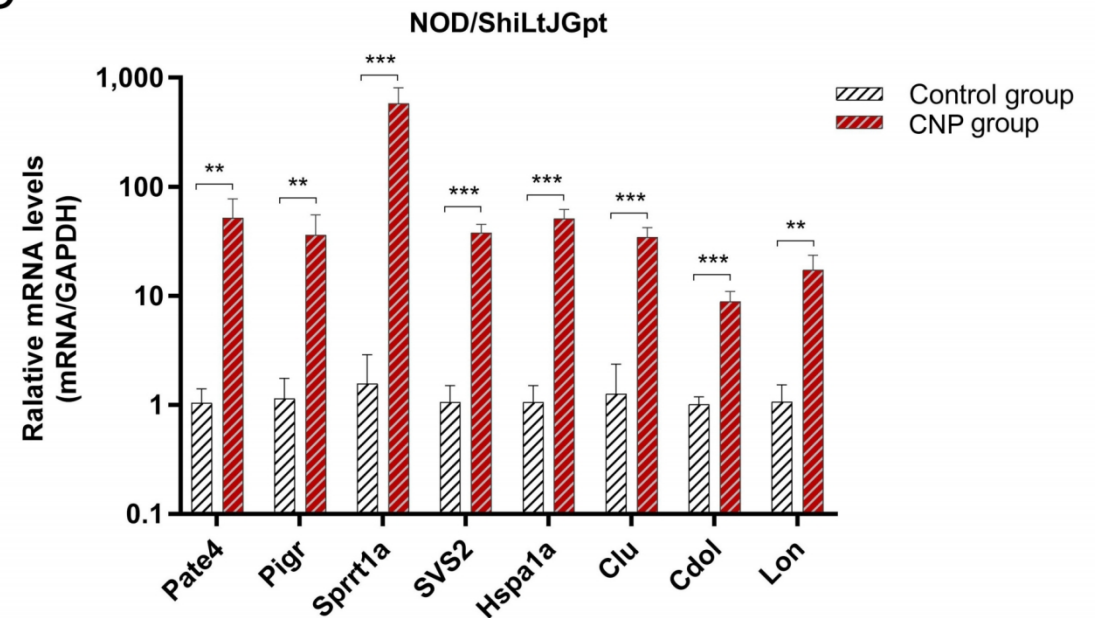

**Supplementary Figure S2.** Annotation of immune-related genes and quantitative reverse transcription-polymerase chain reaction validation (qRT-PCR). A. Annotation of the function of the differentially expressed genes between prostate tissues derived from chronic nonbacteria prostatitis (CNP) and negative controls. B. The relative expression of Neutrophil cell-related genes by comparing the prostate tissues derived from CNP models and negative controls. C. The infiltrated neutrophil cells in the prostatic interstitium. D. Validation of the differential expression mRNAs via qRT-PCR in prostate tissues derived from chronic nonbacteria prostatitis and negative controls. Note: \*\* means  $P < 0.01$ ; \*\*\* means  $P < 0.001$ .

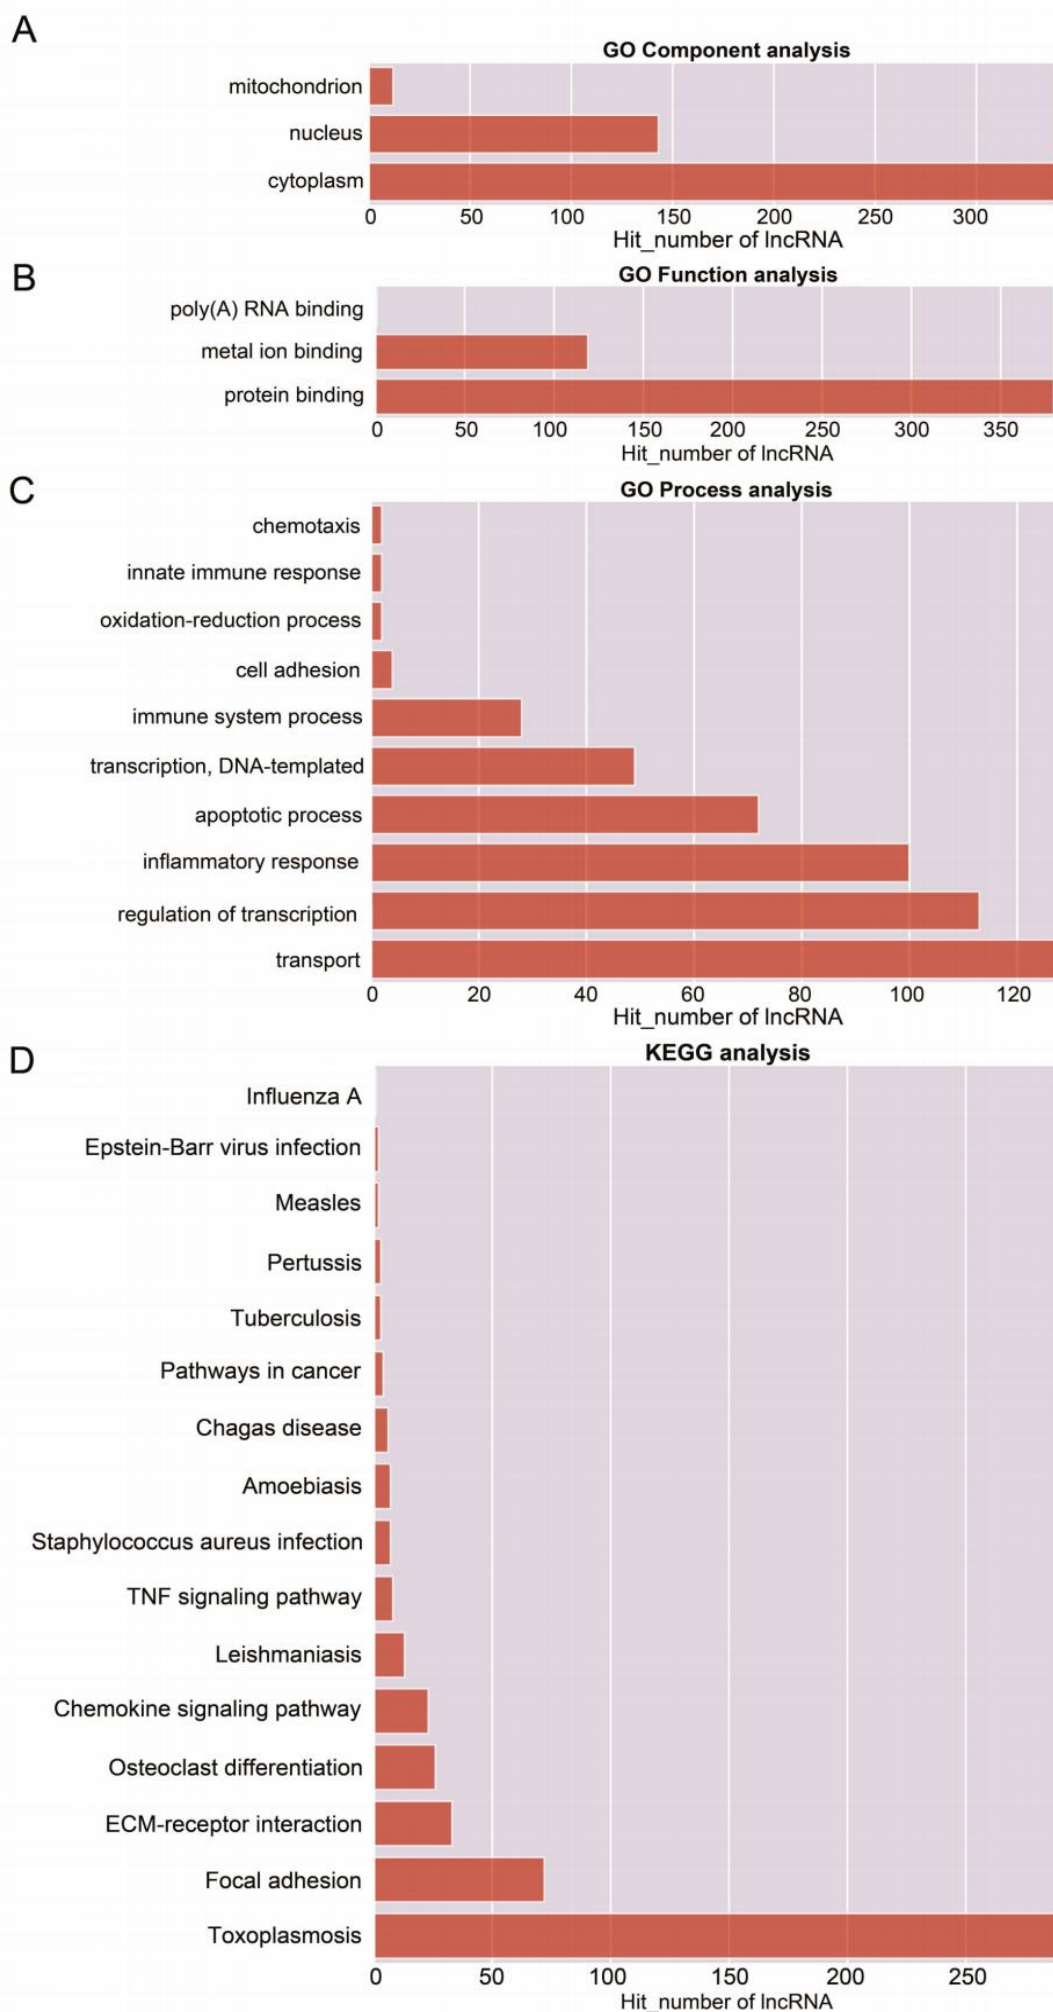

**Supplementary Figure S3.** Gene ontology and Kyoto encyclopedia of genes and genomes (KEGG) analyses for the targeted genes of differentially expressed long noncoding RNAs (lncRNAs). A. Cellular component; B. molecular function; C. biological process; D. KEGG analyses.

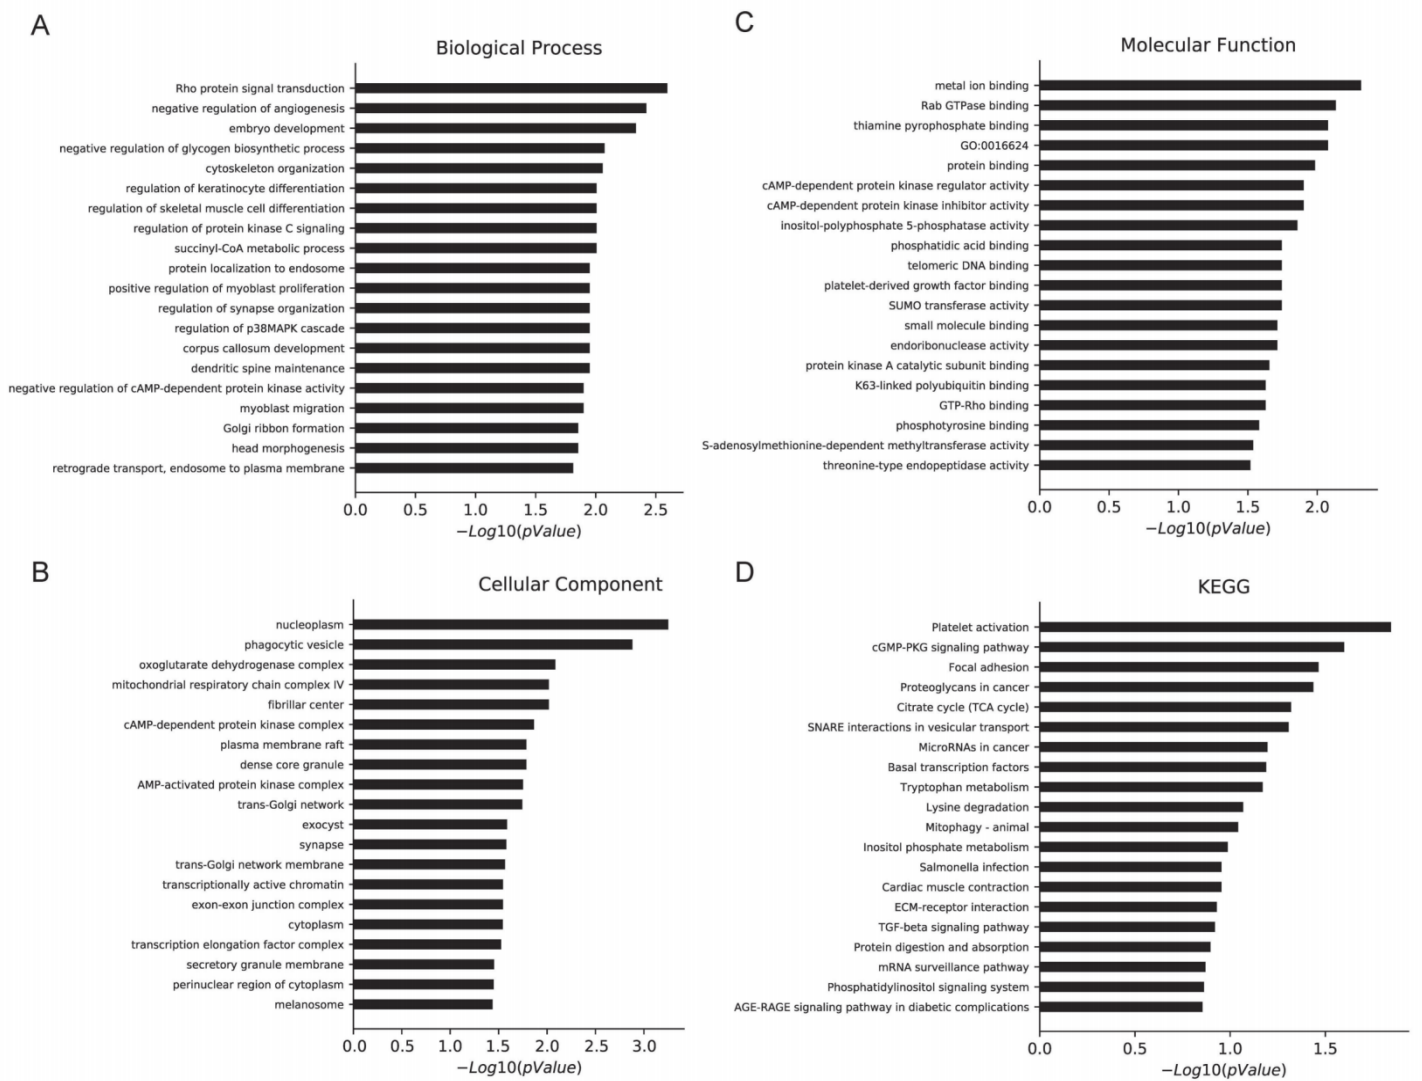

**Supplementary Figure S4.** Gene ontology and Kyoto encyclopedia of genes and genomes (KEGG) analyses for the targeted genes of differentially expressed circular RNAs (circRNAs). A. Biological process; B. Cellular component; C. molecular function; D. KEGG analyses.

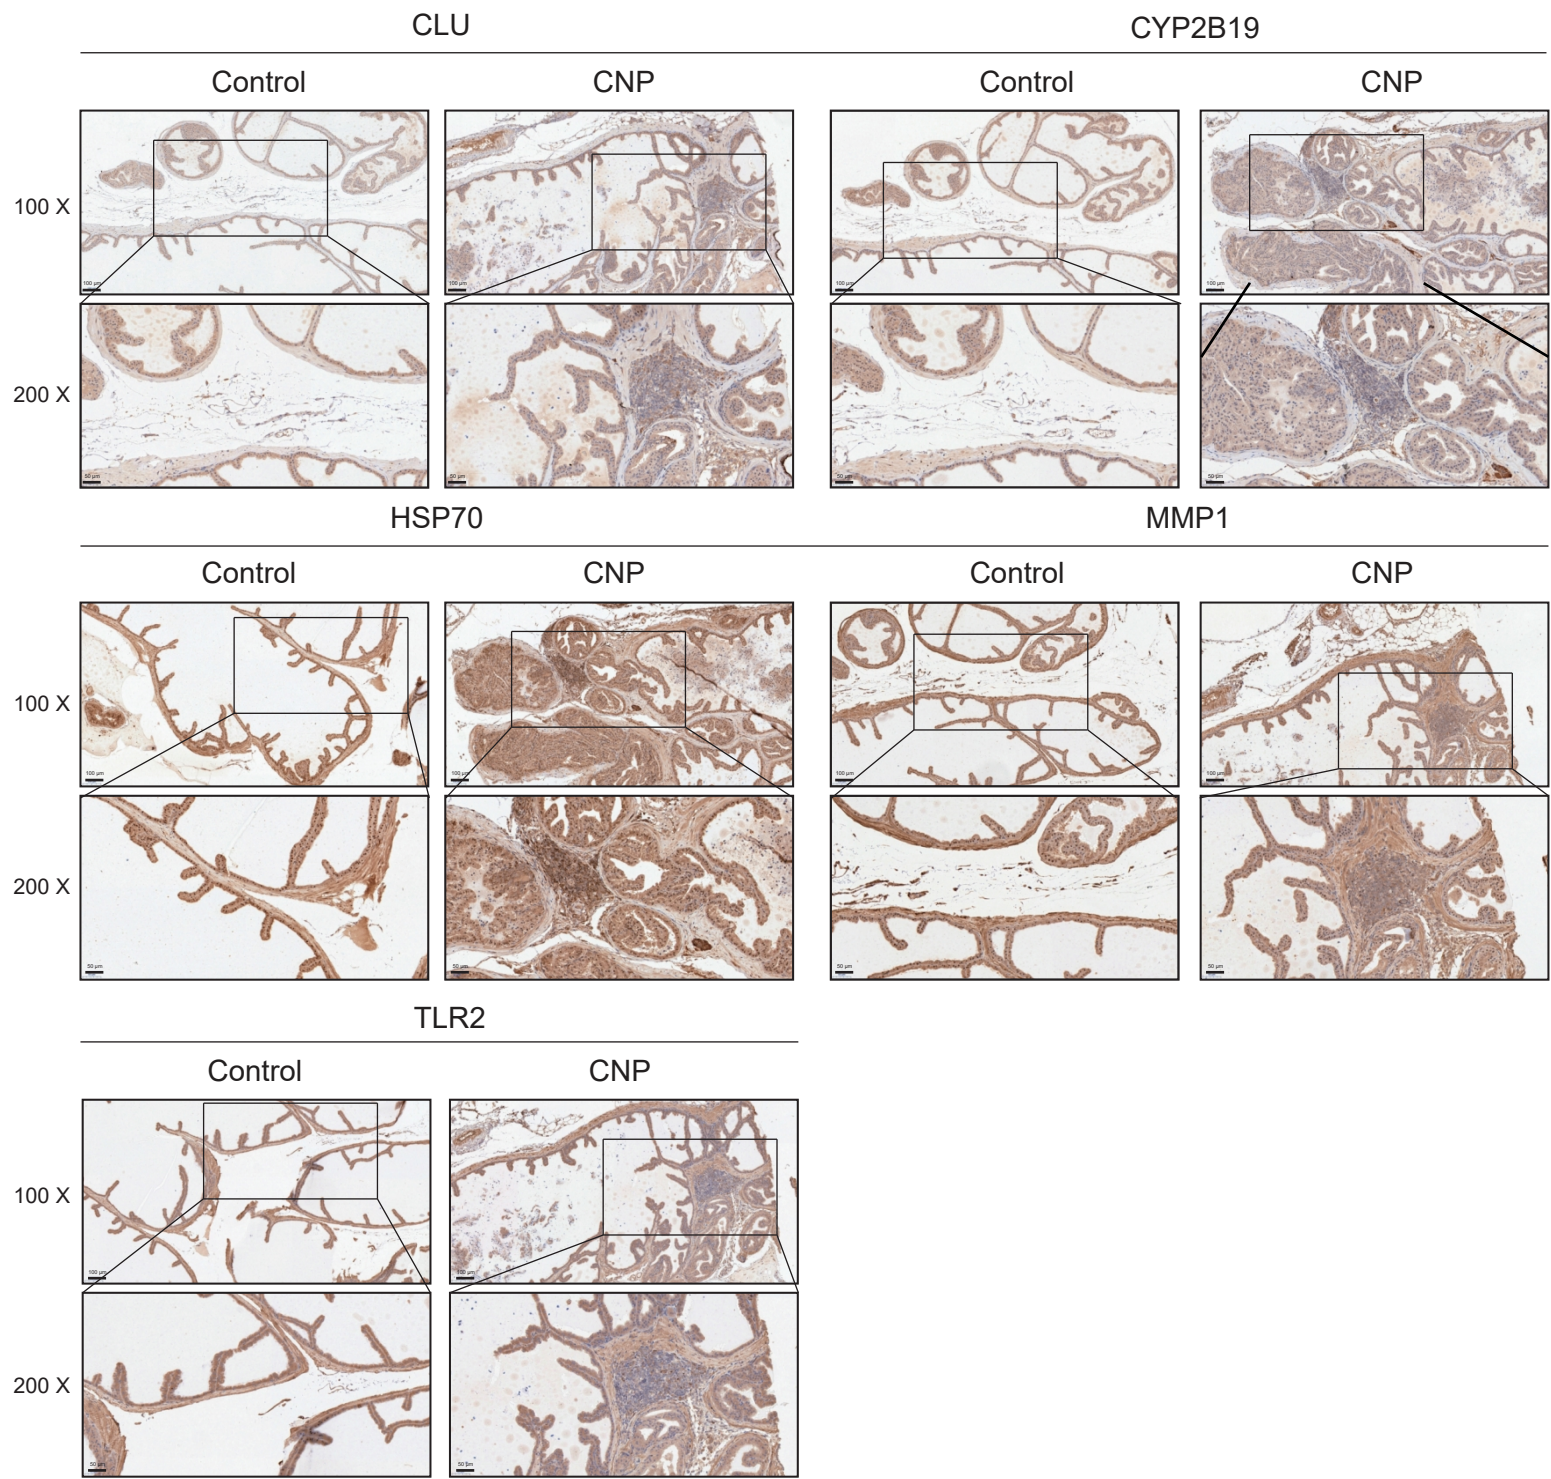

**Supplementary Figure S5.** The expression differences of CLU, CYP2B19, HSP70, MMP1, and TLR2 between chronic-nonbacterial prostatitis (CNP) and negative control groups.

Control

CNP  
(DMSO)

CNP  
(AMD3100)

100 ×

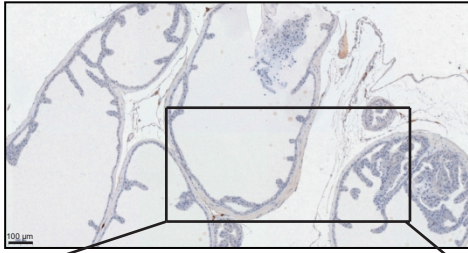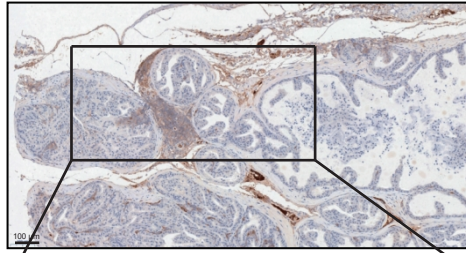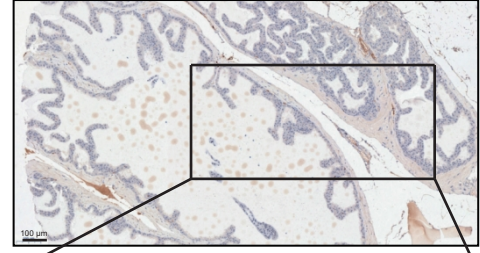

200 ×

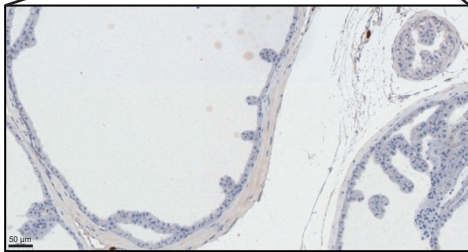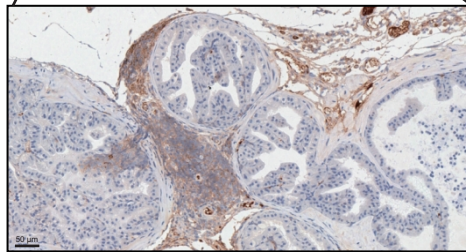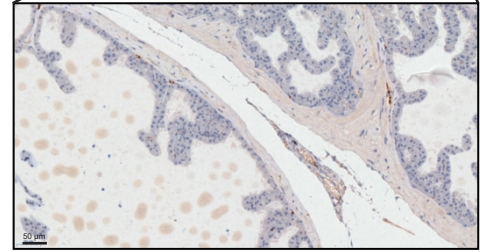

**Supplementary Figure S6.** The infiltrated differences of CXCR4+ inflammatory cells in control, chronic nonbacterial prostatitis (CNP), and CNP mice treated with AMD3100 subgroups.

A

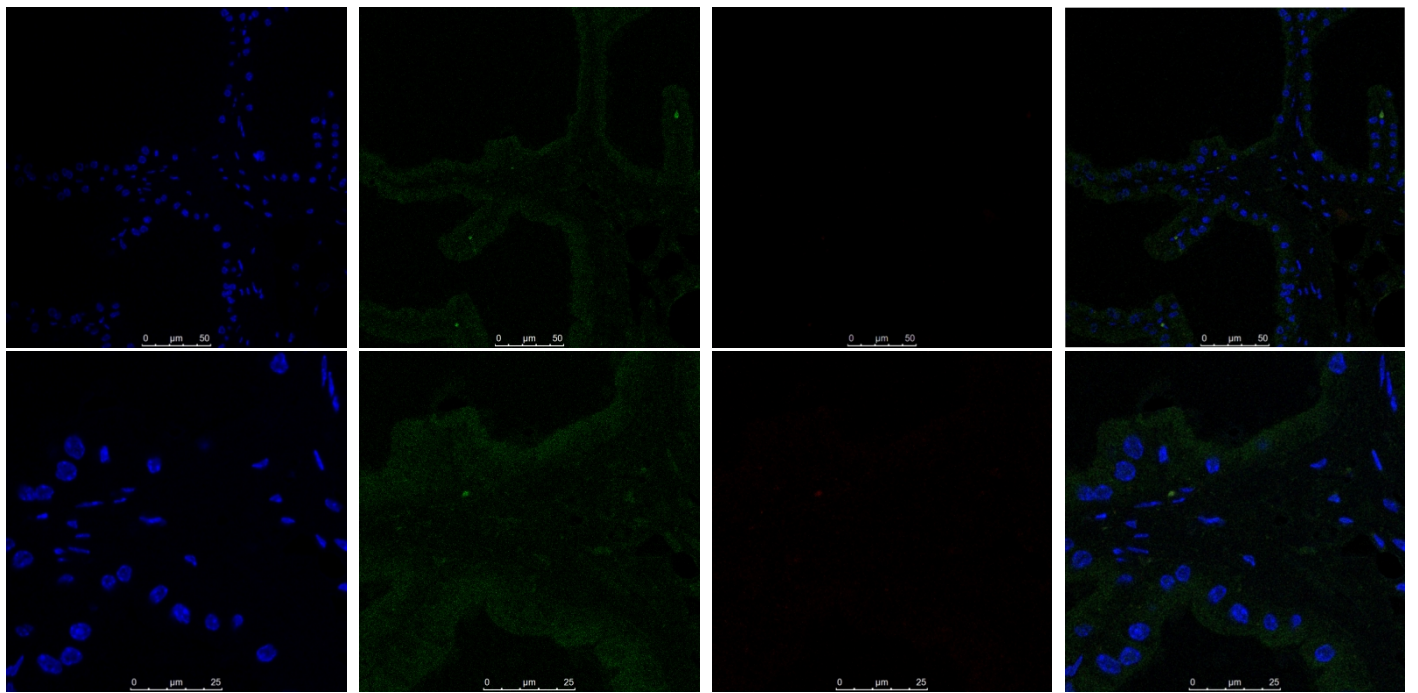

B

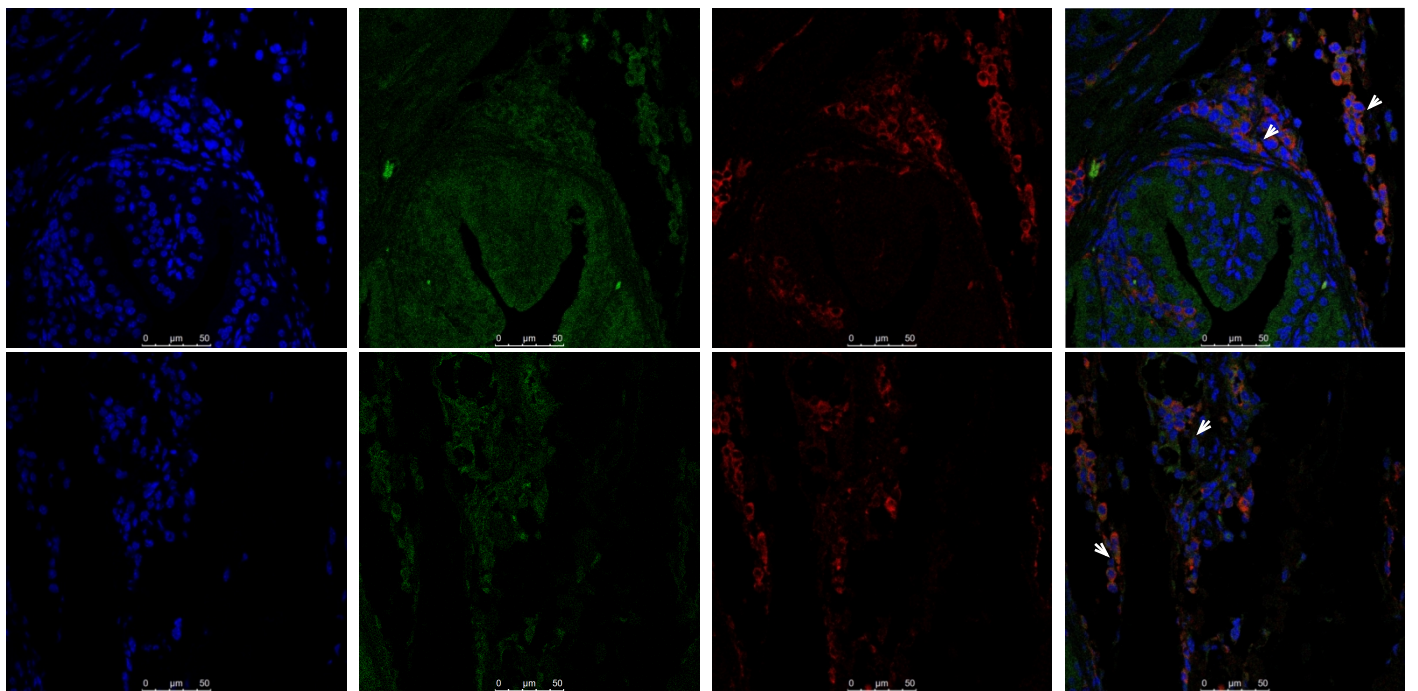

C

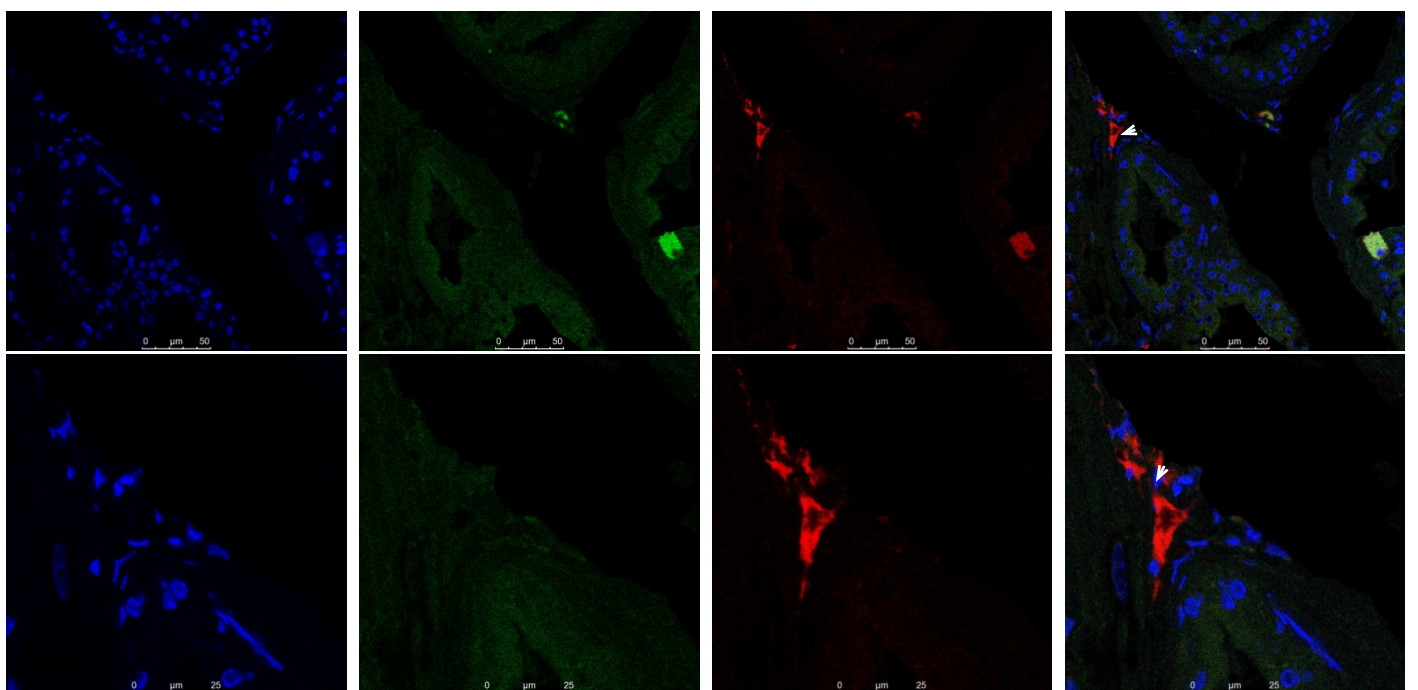

**Supplementary Figure S7.** Immunofluorescence staining showed the infiltration difference of Th1 cells in the prostate tissues derived from negative control (A), chronic nonbacteria prostatitis (CNP, B), and CNP mice treated with AMD3100 (CXCL12/CXCR4 inhibitor, C). Note: white arrows pointed out the infiltrated inflammatory cells.



**A**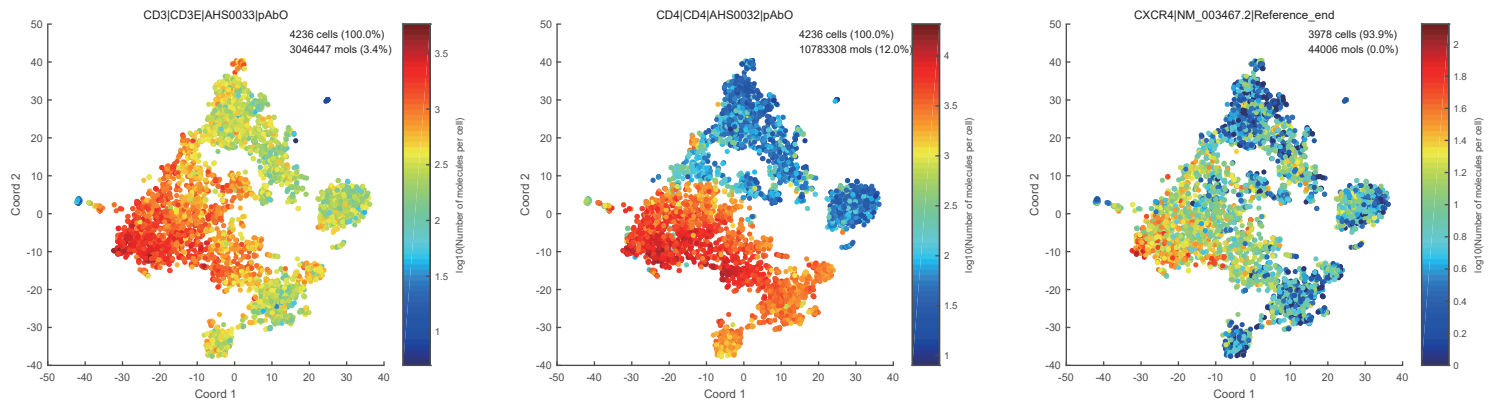**B**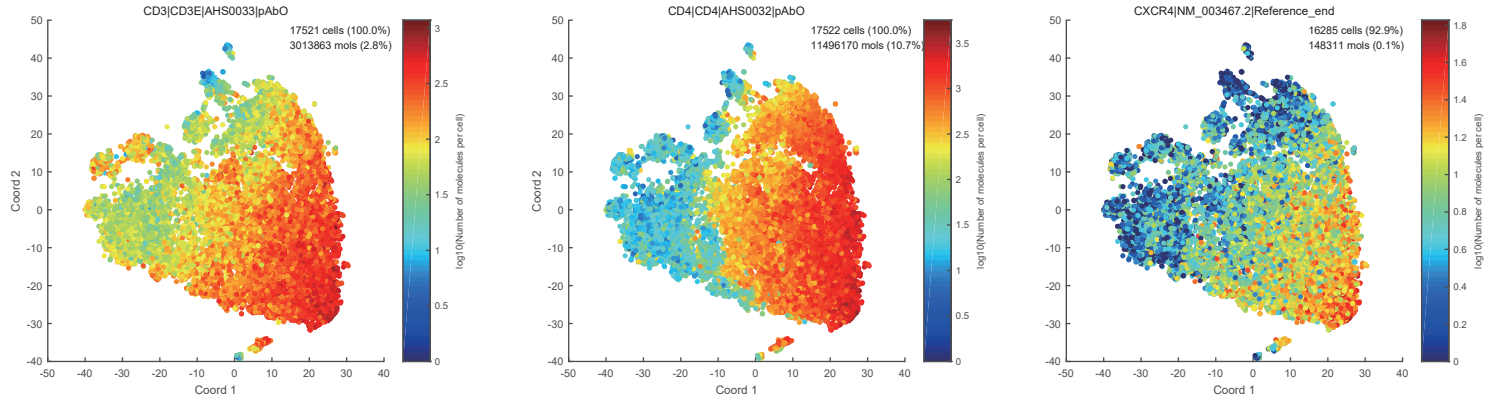

**Supplementary Figure S8.** Uniform manifold approximation and projection (UMAP) displayed the expression of CXCR4 in human CD4+T cells from both healthy controls (A) and prostatitis patients (B). Each point represented one cell. The color of each point represented the number of molecules per cell. In both groups, the proportion of CXCR4+CD4+T cells was over than 90%.

**Supplementary Table S1.** Detailed information of the antibodies used in current study

| <b>Protein Symbol</b>    | <b>Catalog number</b> | <b>Company</b>                              |
|--------------------------|-----------------------|---------------------------------------------|
| COX-2                    | bs-0732R-FITC         | Beijing Biosynthesis Biotechnology CO., Ltd |
| IL-1 $\beta$             | #122425               | Cell Signaling Technology, Inc              |
| CXCL12                   | 17402-1-AP            | Proteintech Group, Inc                      |
| TLR2                     | DF7002                | Affinity Biosciences, Ltd                   |
| CXCR4                    | AF5279                | Affinity Biosciences, Ltd                   |
| CLU                      | DF6421                | Affinity Biosciences, Ltd                   |
| CYP26B1                  | DF12194               | Affinity Biosciences, Ltd                   |
| HSP70                    | AF5466                | Affinity Biosciences, Ltd                   |
| CD44                     | DF6392                | Affinity Biosciences, Ltd                   |
| MMP12                    | AP6196a               | Affinity Biosciences, Ltd                   |
| GAPDH                    | sc-47724              | Santa Cruz Biotechnology, Inc.              |
| Phospho-NF kappa B p-p65 | sc-101751             | Santa Cruz Biotechnology, Inc.              |
| Phospho-Stat3 (Try705)   | #9145                 | Cell Signaling Technology, Inc              |
| Phospho-Akt (Ser473)     | #4060                 | Cell Signaling Technology, Inc              |

CO., Ltd: company limited; Inc.: Incorporated.

**Supplementary Table S2.** Gene primers for quantitative real time polymerase chain reaction

| <b>Gene Symbol</b> | <b>Forward primer</b> | <b>Reverse primer</b> |
|--------------------|-----------------------|-----------------------|
| <i>Clu</i>         | CCGGACTCCAGATTCCAAGG  | GACGGCGTTCTGAATCTCCT  |
| <i>Lcn2</i>        | GACTTCCGGAGCGATCAGTT  | CTGATCCAGTAGCGACAGCC  |
| <i>Pigr</i>        | TGTGCACAACGCTCATCTCT  | TCACTCGGCAACTCAGGAAC  |
| <i>Sprr1a</i>      | TGCCTTGTGCTACCAATGCT  | CTCCTCACCCCCTTCAGATG  |
| <i>Svs2</i>        | AAAAGGCCACTTCCAGAGCA  | CCATTACGACAAAGTGCGGC  |
| <i>Pate4</i>       | TCGCCTCAGTGCAAGGAAAA  | TCAGGGATCTCAGGCCATCA  |
| <i>Cdo1</i>        | GATCACACGGACTCCCCTG   | CAAAGGCGTGGCATGTATCG  |
| <i>Hspa1a</i>      | CACCATCGAGGAGGTGGATT  | AGCCCACGTGCAATACACAA  |
| <i>16S</i>         | CCCTTAAGAGGGATGCTGCC  | ATGAAGGGGTCGTTGATGGC  |

**Supplementary Table S3.** Long non-coding RNA primers for quantitative real-time polymerase chain reaction

| <b>Accession</b>   | <b>Forward primer</b> | <b>Reverse primer</b> |
|--------------------|-----------------------|-----------------------|
| <i>XR_877436.2</i> | GTTTGGGACTCAGTTTCCCT  | AGACATCCCCACAAGAGGCT  |
| <i>XR_878691.1</i> | TTAGGTTGGTTGCCCTGTGG  | GGTCCTTGCACATCCATCA   |
| <i>XR_879979.2</i> | AACACTTGCGCCAGAGATGA  | GAGAGAAGTGGCCGGTAAGG  |
| <i>NR_102366.1</i> | TGAGCTGCAAGATGTCTCCC  | ATGACGACCTGGGTCTGGTA  |
| <i>NR_131146.1</i> | GAGAAGTCATGCCGTGTGGA  | GGTGTGCTGCATCGAGAGAT  |
| <i>XR_385473.2</i> | AGTGAGGCTTTCCACGACAG  | GCCCTGGCCCTTACTATGTC  |
| <i>XR_389926.3</i> | CACTCGGACACCTCATGCTT  | CACATCGGCAGCATAAACCG  |
| <i>XR_882090.2</i> | CTTGGCACCCAAGGAGCATA  | AGCAGGTGTCTGAAGCATGG  |

**Supplementary Table S4. Detailed clinical information of three BPH patients with CP/CPPS-like symptoms.**

| <b>ID</b> | <b>Age (years)</b> | <b>NIH-CPSI</b> | <b>NIH-Pain Index</b> | <b>PSA ng/ml</b> | <b>FPSA/TPSA</b> | <b>Evidence of cancer</b>                              | <b>History of cancer</b> |
|-----------|--------------------|-----------------|-----------------------|------------------|------------------|--------------------------------------------------------|--------------------------|
| Case 1    | 74                 | 28              | 10                    | 9.07             | 0.17             | None (Confirmed by needle biopsy of prostate and TURP) | None                     |
| Case 2    | 85                 | 32              | 11                    | 1.380            | 0.193            | None                                                   | None                     |
| Case 3    | 67                 | 37              | 15                    | 8.05             | 0.137            | None (Confirmed by needle biopsy of prostate and TURP) | None                     |

BPH, Benign Prostate Hyperplasia; CP/CPPS-like symptoms, chronic prostatitis/chronic pelvic pain syndrome-like symptoms; NIH-CPSI, National Institutes of Health Chronic Prostatitis Symptom Index; PSA, prostate specific antigen; TPSA, total prostate specific antigen; FPSA, free prostate specific antigen; TURP, transurethral resection of the prostate.

**Supplementary Table S5. Differentially expressed genes between prostate tissues derived from chronic non-bacteria prostatitis and negative controls.**

| <b>GeneSymbol</b> | <b>P-value (P_vs_C)</b> | <b>log2FC (P_vs_C)</b> | <b>Case_mean (P_vs_C)</b> | <b>Control_mean (P_vs_C)</b> |
|-------------------|-------------------------|------------------------|---------------------------|------------------------------|
| 1700001C19Rik     | 0.001735195             | -1.892557708           | 2.054796201               | 3.947353909                  |
| 1700001C19Rik     | 4.78E-05                | -1.257744632           | 2.482924254               | 3.740668887                  |
| 1700015E13Rik     | 0.001330147             | -1.791330174           | 3.245686796               | 5.037016969                  |
| 1700037C18Rik     | 0.016471653             | -1.599328601           | 2.420586019               | 4.01991462                   |
| 1810011H11Rik     | 0.000183924             | 1.396572794            | 5.043712791               | 3.647139997                  |
| 1810011H11Rik     | 0.00038929              | 1.758376786            | 5.161976955               | 3.403600169                  |
| 2010315B03Rik     | 0.000234202             | -1.069981238           | 5.159010948               | 6.228992186                  |
| 2300002M23Rik     | 0.027052076             | -1.195663057           | 3.312523389               | 4.508186446                  |
| 2300002M23Rik     | 0.001764168             | -1.507399085           | 3.497666723               | 5.005065808                  |
| 3010026O09Rik     | 0.000694867             | -1.108672787           | 4.875247315               | 5.983920102                  |
| 3830406C13Rik     | 0.013154261             | -1.231161602           | 1.96289632                | 3.194057923                  |
| 4930503B20Rik     | 0.002578421             | 1.240276049            | 3.612493611               | 2.372217562                  |
| 4930503B20Rik     | 0.007904714             | 1.032085634            | 3.414909318               | 2.382823684                  |
| 4930522H14Rik     | 4.84E-05                | 1.306091953            | 9.317959661               | 8.011867708                  |
| 4930522H14Rik     | 0.001065358             | 1.153197663            | 9.119683232               | 7.966485569                  |
| 4931428F04Rik     | 0.000258734             | 1.075898191            | 3.747351118               | 2.671452927                  |
| 4931428F04Rik     | 0.01284495              | 1.186457963            | 3.765786675               | 2.579328713                  |
| 4931429L15Rik     | 0.008060998             | -1.83068502            | 2.768711701               | 4.599396721                  |
| 4931429L15Rik     | 0.016352135             | -1.131583761           | 3.761008714               | 4.892592475                  |
| 4933412E24Rik     | 0.01743381              | -1.020736812           | 2.962012833               | 3.982749645                  |
| 4933427G17Rik     | 0.030763721             | -1.101160662           | 2.99425946                | 4.095420121                  |
| 4933430I17Rik     | 2.62E-05                | -1.047769352           | 3.389709316               | 4.437478668                  |
| 5430427O19Rik     | 0.000319481             | -1.861933398           | 1.505923595               | 3.367856992                  |
| 5730559C18Rik     | 0.008606186             | 1.784037274            | 4.084638917               | 2.300601643                  |
| 5730559C18Rik     | 0.017811979             | 1.22708933             | 3.91377804                | 2.68668871                   |
| 5730559C18Rik     | 0.013991679             | 1.462461363            | 3.93440255                | 2.471941187                  |
| 5730559C18Rik     | 0.000524693             | 1.785234612            | 4.122213343               | 2.33697873                   |
| 5730559C18Rik     | 0.000195745             | 1.635392985            | 3.926421709               | 2.291028724                  |
| 6430550D23Rik     | 0.024790481             | -1.33684073            | 2.971970728               | 4.308811458                  |
| 7530416G11Rik     | 0.000339648             | 1.378743835            | 6.992014048               | 5.613270213                  |
| 8030423J24Rik     | 7.56E-08                | 1.190848754            | 9.954281368               | 8.763432615                  |
| 9830147E19Rik     | 0.018982192             | 1.058966631            | 4.945506638               | 3.886540008                  |
| 9930111J21Rik2    | 0.000257149             | 1.251388913            | 5.801839967               | 4.550451054                  |
| 9930111J21Rik2    | 0.000756703             | 1.428243354            | 5.935002683               | 4.506759329                  |
| A2m               | 1.56E-05                | 4.141684638            | 5.21343934                | 1.071754702                  |
| A3galt2           | 0.000611298             | -1.105716774           | 4.724813848               | 5.830530623                  |
| A3galt2           | 0.00031434              | -1.143793732           | 4.671958763               | 5.815752494                  |
| A4gnt             | 3.59E-06                | -1.266996701           | 7.140581174               | 8.407577875                  |
| A4gnt             | 3.88E-05                | -1.376408436           | 6.967727631               | 8.344136067                  |
| A530064D06Rik     | 5.08E-05                | -1.417936257           | 5.551838887               | 6.969775144                  |
| A530064D06Rik     | 0.00010313              | -1.4681193             | 5.485947361               | 6.954066661                  |
| A530064D06Rik     | 0.000233762             | -1.288120864           | 5.69745956                | 6.985580424                  |
| A530064D06Rik     | 8.26E-05                | -1.251511037           | 5.873009682               | 7.124520719                  |
| A730017C20Rik     | 0.006558713             | -1.11456984            | 3.970638643               | 5.085208483                  |

|                      |             |              |             |             |
|----------------------|-------------|--------------|-------------|-------------|
| <i>A730017C20Rik</i> | 0.006566538 | -1.347811987 | 3.787149383 | 5.13496137  |
| <i>A830021F12Rik</i> | 0.035589404 | -1.491118871 | 2.550971644 | 4.042090515 |
| <i>AA986860</i>      | 0.000362344 | 3.365200294  | 5.84767233  | 2.482472036 |
| <i>AA986860</i>      | 2.70E-05    | 3.435419811  | 6.126377322 | 2.69095751  |
| <i>AB124611</i>      | 0.001421799 | 1.04985049   | 5.388463361 | 4.338612871 |
| <i>AB124611</i>      | 0.001667338 | 1.109562833  | 4.451238694 | 3.341675861 |
| <i>AB124611</i>      | 0.000887441 | 1.320689472  | 4.706223186 | 3.385533714 |
| <i>AB124611</i>      | 0.000965358 | 1.449294142  | 5.221814384 | 3.772520243 |
| <i>AI467606</i>      | 0.001916818 | 1.113342627  | 5.466765127 | 4.3534225   |
| <i>AW551984</i>      | 3.60E-05    | 1.109732045  | 7.613019055 | 6.50328701  |
| <i>Aamdc</i>         | 0.002081126 | -1.038334608 | 3.598730094 | 4.637064702 |
| <i>Abca4</i>         | 0.000433721 | 1.040851523  | 8.933017177 | 7.892165654 |
| <i>Abca9</i>         | 0.000758136 | 1.225022547  | 5.47574206  | 4.250719514 |
| <i>Abca9</i>         | 0.000592117 | 1.321307563  | 5.453311487 | 4.132003924 |
| <i>Abca9</i>         | 2.13E-05    | 1.220591571  | 5.445192313 | 4.224600742 |
| <i>Abi3</i>          | 0.000276455 | 1.203788468  | 4.242128016 | 3.038339548 |
| <i>Abl1</i>          | 4.75E-05    | 1.092105558  | 8.030881592 | 6.938776034 |
| <i>Abtb2</i>         | 0.010371675 | 1.014922456  | 4.010542463 | 2.995620007 |
| <i>Acer2</i>         | 0.048052291 | 1.094403851  | 7.679461129 | 6.585057278 |
| <i>Acer2</i>         | 0.028730924 | 1.158376473  | 7.717661065 | 6.559284592 |
| <i>Acer2</i>         | 0.041831434 | 1.1001014    | 7.727525322 | 6.627423922 |
| <i>Ache</i>          | 0.003096696 | 2.147700844  | 3.731314618 | 1.583613774 |
| <i>Acod1</i>         | 0.014729494 | 1.49436324   | 3.937160966 | 2.442797726 |
| <i>Acrv1</i>         | 0.000420998 | -1.031418206 | 5.013761773 | 6.045179979 |
| <i>Actc1</i>         | 4.38E-06    | -1.181518507 | 6.203487035 | 7.385005542 |
| <i>Actl10</i>        | 1.93E-05    | -1.137461025 | 6.917697383 | 8.055158408 |
| <i>Adam19</i>        | 0.000576227 | 1.026222587  | 6.389648474 | 5.363425888 |
| <i>Adam19</i>        | 0.000275414 | 1.005698366  | 6.220192021 | 5.214493655 |
| <i>Adam19</i>        | 2.90E-05    | 1.267260577  | 6.476661002 | 5.209400425 |
| <i>Adam19</i>        | 0.000683432 | 1.065735986  | 6.307187925 | 5.241451939 |
| <i>Adam2</i>         | 1.27E-05    | 1.228995686  | 9.296203853 | 8.067208166 |
| <i>Adam23</i>        | 0.019301952 | 1.285570934  | 4.100634735 | 2.815063801 |
| <i>Adam23</i>        | 0.02270157  | 1.150436797  | 4.064420291 | 2.913983494 |
| <i>Adam23</i>        | 0.009496504 | 1.238973703  | 4.158593284 | 2.919619581 |
| <i>Adam23</i>        | 0.004235906 | 1.185965659  | 4.4199093   | 3.233943642 |
| <i>Adam8</i>         | 1.31E-05    | 2.561333592  | 7.194659978 | 4.633326386 |
| <i>Adam8</i>         | 6.65E-05    | 3.167226057  | 7.372922889 | 4.205696832 |
| <i>Adam8</i>         | 1.42E-05    | 2.820692718  | 7.243691588 | 4.42299887  |
| <i>Adam8</i>         | 2.17E-05    | 2.925027601  | 7.238513299 | 4.313485698 |
| <i>Adam8</i>         | 2.11E-05    | 2.774932328  | 7.298172447 | 4.523240119 |
| <i>Adamts20</i>      | 0.006146029 | 1.286203667  | 3.627556148 | 2.341352481 |
| <i>Adamts20</i>      | 0.000132101 | 1.614590181  | 3.756874774 | 2.142284593 |
| <i>Adamts20</i>      | 0.011306823 | 1.133756232  | 3.913533757 | 2.779777524 |
| <i>Adamts20</i>      | 0.004440749 | 1.499234148  | 3.383104407 | 1.883870259 |
| <i>Adamts9</i>       | 0.000206497 | 1.067388266  | 5.852364226 | 4.78497596  |
| <i>Adarb2</i>        | 3.75E-06    | -1.127650936 | 5.866672449 | 6.994323385 |

|                |             |              |             |             |
|----------------|-------------|--------------|-------------|-------------|
| <i>Adarb2</i>  | 3.97E-05    | -1.067643291 | 5.794454418 | 6.862097709 |
| <i>Adcy4</i>   | 0.000494569 | 1.034953411  | 8.070335624 | 7.035382213 |
| <i>Adgb</i>    | 0.034002091 | 1.457876771  | 4.141642367 | 2.683765595 |
| <i>Adgre1</i>  | 2.92E-05    | 1.513286134  | 7.596624412 | 6.083338279 |
| <i>Adgre1</i>  | 4.31E-05    | 1.65640231   | 7.733932829 | 6.077530519 |
| <i>Adgre1</i>  | 5.07E-05    | 1.717391677  | 7.844274422 | 6.126882745 |
| <i>Adgrl3</i>  | 0.008274098 | -1.204110514 | 3.07269511  | 4.276805623 |
| <i>Adrb1</i>   | 0.012785428 | 1.166431964  | 3.882062584 | 2.71563062  |
| <i>Adssl1</i>  | 0.003566243 | 1.311989433  | 4.588887119 | 3.276897687 |
| <i>Aebp1</i>   | 6.55E-05    | 1.232838107  | 8.090825406 | 6.857987298 |
| <i>Aebp1</i>   | 0.000160711 | 1.436126132  | 7.868609383 | 6.43248325  |
| <i>Afp</i>     | 1.92E-06    | 1.119648099  | 6.110277469 | 4.99062937  |
| <i>Ager</i>    | 0.00210158  | -1.041504244 | 4.666591032 | 5.708095276 |
| <i>Ago4</i>    | 0.000286186 | -1.08481639  | 7.662185206 | 8.747001596 |
| <i>Ahsa2</i>   | 0.005543117 | 1.149905413  | 7.723605222 | 6.57369981  |
| <i>Aif1</i>    | 0.000297438 | 1.428279911  | 5.350179447 | 3.921899536 |
| <i>Aif1</i>    | 9.04E-05    | 1.609565377  | 5.530196515 | 3.920631138 |
| <i>Aif1</i>    | 1.31E-05    | 1.932831632  | 5.678924835 | 3.746093203 |
| <i>Aif1</i>    | 0.000262992 | 1.522764376  | 5.396389038 | 3.873624662 |
| <i>Aif1</i>    | 4.14E-05    | 1.746689337  | 5.364166348 | 3.617477011 |
| <i>Aif1</i>    | 0.000324043 | 1.310349296  | 5.394522916 | 4.08417362  |
| <i>Aifm3</i>   | 0.045575964 | -1.218226706 | 2.957463557 | 4.175690263 |
| <i>Akap2</i>   | 0.001762393 | -2.556744833 | 1.324436239 | 3.881181072 |
| <i>Aldh3a1</i> | 3.67E-05    | 1.527623715  | 3.546885177 | 2.019261462 |
| <i>Aldh3a1</i> | 0.022507657 | 1.53991837   | 3.483333622 | 1.943415252 |
| <i>Alox12e</i> | 0.003641605 | -1.204635999 | 3.263115529 | 4.467751528 |
| <i>Alox12e</i> | 0.0003411   | -1.48703175  | 3.115175595 | 4.602207345 |
| <i>Alox5ap</i> | 0.00104772  | 1.143479624  | 8.239281034 | 7.09580141  |
| <i>Alox5ap</i> | 0.00415449  | 1.074723341  | 7.96679418  | 6.892070838 |
| <i>Aloxe3</i>  | 0.000824086 | 2.571912014  | 5.780887803 | 3.208975789 |
| <i>Als2cl</i>  | 4.89E-05    | 1.809466726  | 5.921637691 | 4.112170965 |
| <i>Als2cl</i>  | 0.00010664  | 1.591756848  | 5.871762076 | 4.280005228 |
| <i>Als2cl</i>  | 0.000198096 | 1.588412708  | 5.924294246 | 4.335881538 |
| <i>Als2cl</i>  | 1.16E-05    | 1.534281271  | 5.808922736 | 4.274641466 |
| <i>Als2cl</i>  | 5.82E-05    | 1.694933812  | 5.797160344 | 4.102226532 |
| <i>Als2cl</i>  | 7.52E-06    | 2.168321583  | 5.988249008 | 3.819927425 |
| <i>Als2cl</i>  | 0.000100875 | 1.587430222  | 5.797486424 | 4.210056202 |
| <i>Als2cl</i>  | 0.000961279 | 1.467355305  | 5.830819025 | 4.36346372  |
| <i>Als2cl</i>  | 0.001079434 | 1.583915777  | 5.761316629 | 4.177400852 |
| <i>Als2cl</i>  | 0.000387431 | 1.404362856  | 5.932466887 | 4.52810403  |
| <i>Als2cl</i>  | 7.07E-06    | 1.798583084  | 5.996934232 | 4.198351148 |
| <i>Amelx</i>   | 0.000318221 | -1.844564537 | 3.782610813 | 5.627175349 |
| <i>Amelx</i>   | 0.002461976 | -1.629043309 | 3.914593143 | 5.543636452 |
| <i>Amelx</i>   | 7.27E-05    | 1.317985113  | 5.807688458 | 4.489703345 |
| <i>Amer2</i>   | 0.001625921 | 1.022370217  | 8.627147333 | 7.604777116 |
| <i>Amica1</i>  | 0.019647214 | 1.50303324   | 4.020460754 | 2.517427514 |



|                 |             |              |             |             |
|-----------------|-------------|--------------|-------------|-------------|
| <i>Amica1</i>   | 0.004353273 | 1.294739221  | 4.368761844 | 3.074022623 |
| <i>Amica1</i>   | 0.003666269 | 1.661986183  | 4.458279113 | 2.79629293  |
| <i>Amica1</i>   | 0.004829673 | 2.064320232  | 4.000898851 | 1.936578618 |
| <i>Anapc15</i>  | 3.72E-05    | -1.2580979   | 8.726196384 | 9.984294284 |
| <i>Ang2</i>     | 0.006116777 | -1.012489528 | 3.715886007 | 4.728375534 |
| <i>Angpt4</i>   | 0.000130539 | 1.014214483  | 7.703483339 | 6.689268856 |
| <i>Ank</i>      | 0.003572831 | 1.045268202  | 6.683346427 | 5.638078225 |
| <i>Ankdd1a</i>  | 0.00018474  | -1.137241001 | 4.957068829 | 6.09430983  |
| <i>Ankdd1a</i>  | 8.72E-07    | -1.081666288 | 3.899185835 | 4.980852123 |
| <i>Ankfn1</i>   | 0.00729564  | 1.099752995  | 5.040967896 | 3.941214901 |
| <i>Ankrd33b</i> | 1.55E-05    | 1.180238437  | 4.675277653 | 3.495039216 |
| <i>Ankrd33b</i> | 0.003940738 | 1.324626438  | 4.625045276 | 3.300418838 |
| <i>Ankrd35</i>  | 0.006630132 | -1.081957743 | 3.385175268 | 4.467133011 |
| <i>Ankrd6</i>   | 0.000512525 | 1.070499087  | 3.423237794 | 2.352738708 |
| <i>Ano9</i>     | 0.014951621 | 2.052018355  | 3.648768986 | 1.59675063  |
| <i>Ano9</i>     | 0.000200171 | 2.093133015  | 3.679226615 | 1.5860936   |
| <i>Ano9</i>     | 0.000322174 | 2.420308945  | 3.812532226 | 1.392223281 |
| <i>Anpep</i>    | 3.54E-07    | 1.811927085  | 7.553674704 | 5.74174762  |
| <i>Anpep</i>    | 9.39E-07    | 1.969282946  | 7.530483466 | 5.56120052  |
| <i>Anxa1</i>    | 4.35E-09    | 1.50949421   | 10.91736645 | 9.407872242 |
| <i>Anxa2</i>    | 1.29E-05    | 1.488659115  | 10.6393429  | 9.150683781 |
| <i>Anxa2</i>    | 0.000489317 | 1.341452188  | 11.04447906 | 9.703026868 |
| <i>Anxa3</i>    | 7.93E-06    | 1.852144184  | 10.4536282  | 8.601484017 |
| <i>Anxa6</i>    | 2.59E-05    | -1.100314299 | 5.16326797  | 6.263582268 |
| <i>Anxa8</i>    | 0.000285005 | 1.012212817  | 7.523065672 | 6.510852856 |
| <i>Aoah</i>     | 0.009185571 | 1.2694441    | 4.316016541 | 3.046572442 |
| <i>Aoah</i>     | 0.001483132 | 1.606744368  | 4.109068629 | 2.50232426  |
| <i>Aoah</i>     | 0.001118074 | 1.528411746  | 4.486251734 | 2.957839988 |
| <i>Aoah</i>     | 0.006163679 | 1.424029873  | 5.943129168 | 4.519099296 |
| <i>Aoah</i>     | 0.000371494 | 1.323458148  | 3.919421255 | 2.595963107 |
| <i>Aox4</i>     | 0.017428083 | -1.250029294 | 2.355957396 | 3.605986691 |
| <i>Ap1s2</i>    | 0.003003755 | 1.377150536  | 4.221324915 | 2.844174379 |
| <i>Apbb1ip</i>  | 0.003121276 | 1.549471682  | 4.970937114 | 3.421465432 |
| <i>Apbb1ip</i>  | 0.000337301 | 1.807816437  | 5.137492007 | 3.329675571 |
| <i>Apobec1</i>  | 7.81E-09    | 1.562185606  | 7.497328737 | 5.935143131 |
| <i>Apobec1</i>  | 1.01E-07    | 1.866313912  | 7.735429521 | 5.869115609 |
| <i>Apobr</i>    | 0.000255088 | 1.460846197  | 3.805546054 | 2.344699857 |
| <i>Apoe</i>     | 0.000284601 | 1.163587629  | 12.18484204 | 11.02125441 |
| <i>Apoe</i>     | 0.000650141 | 1.054991733  | 12.16683308 | 11.11184135 |
| <i>Apoe</i>     | 0.000153867 | 1.279078978  | 12.20838763 | 10.92930865 |
| <i>Apoe</i>     | 0.00010947  | 1.283918037  | 12.313748   | 11.02982996 |
| <i>Apol11a</i>  | 0.038153052 | -1.004520576 | 3.292885583 | 4.29740616  |
| <i>Apol8</i>    | 0.000156723 | -1.008349224 | 4.530087136 | 5.53843636  |
| <i>Apol8</i>    | 8.18E-05    | -1.700288876 | 3.720922073 | 5.421210949 |
| <i>Apol8</i>    | 0.000116971 | -1.663715278 | 3.91695372  | 5.580668998 |
| <i>Apol8</i>    | 0.001201379 | -1.2530973   | 4.195519393 | 5.448616693 |

|                 |             |              |             |             |
|-----------------|-------------|--------------|-------------|-------------|
| <i>Apol8</i>    | 7.02E-06    | -1.296764405 | 4.114109836 | 5.41087424  |
| <i>Apol8</i>    | 4.26E-05    | -1.474227995 | 3.801891786 | 5.276119781 |
| <i>Apol8</i>    | 0.000314858 | -1.373121481 | 4.021962961 | 5.395084442 |
| <i>Apol8</i>    | 0.000494811 | -1.364497818 | 3.994336817 | 5.358834635 |
| <i>Arg1</i>     | 0.00438968  | 2.595134157  | 5.430406714 | 2.835272556 |
| <i>Arhgap15</i> | 0.002298997 | 1.916038538  | 4.047693675 | 2.131655137 |
| <i>Arhgap15</i> | 0.003880806 | 1.552130392  | 4.010502047 | 2.458371655 |
| <i>Arhgap15</i> | 0.000432417 | 1.49036295   | 3.72445405  | 2.2340911   |
| <i>Arhgap15</i> | 0.001894389 | 2.354270356  | 4.148858968 | 1.794588612 |
| <i>Arhgap15</i> | 0.040670794 | 1.011636048  | 3.609239692 | 2.597603644 |
| <i>Arhgap15</i> | 1.74E-06    | 1.880006261  | 3.597328508 | 1.717322247 |
| <i>Arhgap15</i> | 0.004669465 | 2.063322073  | 3.913013943 | 1.84969187  |
| <i>Arhgap19</i> | 0.020556387 | 1.038541572  | 4.279549138 | 3.241007566 |
| <i>Arhgap24</i> | 5.80E-06    | 1.075606003  | 8.450604658 | 7.374998654 |
| <i>Arhgap24</i> | 6.91E-06    | 1.216839244  | 8.673463372 | 7.456624128 |
| <i>Arhgap24</i> | 0.002707146 | 1.521745927  | 8.20642407  | 6.684678143 |
| <i>Arhgap28</i> | 0.007053106 | 1.108458217  | 3.843945505 | 2.735487287 |
| <i>Arhgap30</i> | 4.72E-06    | 1.449147035  | 5.015629064 | 3.566482029 |
| <i>Arhgap4</i>  | 0.000103733 | 1.448993861  | 6.115011403 | 4.666017542 |
| <i>Arhgap4</i>  | 0.000784585 | 1.43162157   | 6.058063964 | 4.626442395 |
| <i>Arhgap4</i>  | 7.33E-06    | 1.666830292  | 6.00237236  | 4.335542068 |
| <i>Arhgap4</i>  | 6.08E-05    | 1.374365526  | 4.98656296  | 3.612197434 |
| <i>Arhgap4</i>  | 0.000813813 | 1.352952203  | 4.792249031 | 3.439296829 |
| <i>Arhgap4</i>  | 8.26E-05    | 1.501707733  | 6.082975922 | 4.581268189 |
| <i>Arhgap4</i>  | 8.60E-05    | 1.39676529   | 4.958880779 | 3.562115489 |
| <i>Arhgap4</i>  | 6.97E-05    | 1.592983505  | 6.035550097 | 4.442566592 |
| <i>Arhgap4</i>  | 6.84E-06    | 1.592729217  | 6.243569851 | 4.650840635 |
| <i>Arhgap4</i>  | 0.000200848 | 1.523539613  | 6.029919783 | 4.506380171 |
| <i>Arhgap4</i>  | 7.95E-05    | 1.477503741  | 6.079630401 | 4.60212666  |
| <i>Arhgap4</i>  | 0.00022125  | 1.333569493  | 6.058993994 | 4.725424501 |
| <i>Arhgap9</i>  | 0.001863196 | 1.229962218  | 5.004383608 | 3.77442139  |
| <i>Arhgap9</i>  | 0.000126892 | 1.224358473  | 4.773727654 | 3.54936918  |
| <i>Arhgap9</i>  | 0.002599932 | 1.139467858  | 4.744416421 | 3.604948562 |
| <i>Arhgap9</i>  | 0.00040302  | 1.724713933  | 4.967380952 | 3.242667019 |
| <i>Arhgap9</i>  | 0.008301506 | 1.424470668  | 4.809114376 | 3.384643708 |
| <i>Arhgdib</i>  | 3.71E-06    | 1.761924948  | 7.475468881 | 5.713543933 |
| <i>Arhgdib</i>  | 2.64E-05    | 1.723908885  | 7.227736811 | 5.503827926 |
| <i>Arhgdib</i>  | 4.18E-08    | 1.724479048  | 7.421116868 | 5.696637819 |
| <i>Arhgdib</i>  | 7.67E-06    | 1.691970474  | 7.289945997 | 5.597975523 |
| <i>Arhgdib</i>  | 5.65E-07    | 1.752793198  | 7.570968464 | 5.818175266 |
| <i>Arhgdib</i>  | 4.85E-06    | 1.953156166  | 7.431529783 | 5.478373617 |
| <i>Arhgdib</i>  | 2.20E-06    | 1.857785118  | 7.358889902 | 5.501104784 |
| <i>Arhgef19</i> | 0.005560212 | 1.19387298   | 3.830621207 | 2.636748227 |
| <i>Arhgef19</i> | 0.001653811 | 1.033822479  | 3.901470677 | 2.867648197 |
| <i>Arhgef2</i>  | 4.77E-05    | 1.108695627  | 6.438597418 | 5.329901791 |
| <i>Arhgef2</i>  | 3.22E-05    | 1.40791403   | 6.48231243  | 5.0743984   |

|                      |             |              |             |             |
|----------------------|-------------|--------------|-------------|-------------|
| <i>Arhgef2</i>       | 0.000136955 | 1.129192253  | 6.545811364 | 5.416619111 |
| <i>Arhgef2</i>       | 0.000734803 | 1.156959261  | 6.481846969 | 5.324887707 |
| <i>Arhgef2</i>       | 0.001888222 | 1.223753759  | 6.395174013 | 5.171420254 |
| <i>Arhgef2</i>       | 0.000700205 | 1.185586191  | 6.36270155  | 5.177115359 |
| <i>Arhgef2</i>       | 0.000468079 | 1.162736558  | 6.288971244 | 5.126234686 |
| <i>Arhgef2</i>       | 0.000143484 | 1.207261277  | 6.497774811 | 5.290513533 |
| <i>Arhgef6</i>       | 0.000339178 | 1.035058945  | 6.161003129 | 5.125944184 |
| <i>Arid3c</i>        | 2.25E-05    | -1.830817831 | 3.218027064 | 5.048844895 |
| <i>Arl11</i>         | 2.33E-05    | 1.83158988   | 5.105168298 | 3.273578418 |
| <i>Arl4a</i>         | 0.00916883  | -1.043790349 | 4.559686878 | 5.603477227 |
| <i>Arr3</i>          | 2.89E-05    | 1.310191943  | 3.273959728 | 1.963767784 |
| <i>Arrdc4</i>        | 2.03E-08    | 1.059246857  | 8.934568062 | 7.875321205 |
| <i>Art1</i>          | 4.77E-05    | -1.242812465 | 4.567985755 | 5.81079822  |
| <i>Arxes1</i>        | 0.003252741 | -1.01186651  | 4.651778214 | 5.663644724 |
| <i>Asf1b</i>         | 0.007482029 | 1.082395842  | 4.259525695 | 3.177129853 |
| <i>Astn1</i>         | 0.001710686 | -1.154219833 | 3.491597171 | 4.645817004 |
| <i>Atg10</i>         | 0.008907587 | -1.308587238 | 2.451700837 | 3.760288075 |
| <i>Atp10a</i>        | 0.000701309 | 1.347874287  | 5.572938657 | 4.22506437  |
| <i>Atp10a</i>        | 0.007232429 | 1.138589193  | 5.698669229 | 4.560080036 |
| <i>Atp10a</i>        | 7.45E-05    | 1.095752316  | 5.496200542 | 4.400448226 |
| <i>Atp10a</i>        | 0.003553651 | 1.064379356  | 5.585391644 | 4.521012287 |
| <i>Atp10b</i>        | 4.73E-05    | 1.039812538  | 6.955850509 | 5.916037971 |
| <i>Atp1a3</i>        | 0.000111311 | -1.011486705 | 5.23452824  | 6.246014946 |
| <i>Atp1a3</i>        | 0.000180512 | -1.03544543  | 5.346877173 | 6.382322604 |
| <i>Atp1b4</i>        | 0.000413526 | -2.359022279 | 4.370604212 | 6.729626491 |
| <i>Atp1b4</i>        | 0.000149897 | -2.445832298 | 4.508074663 | 6.953906961 |
| <i>Atp2b2</i>        | 4.28E-06    | 1.226616669  | 6.789385023 | 5.562768354 |
| <i>Aurka</i>         | 7.88E-07    | 1.271533716  | 10.84023011 | 9.568696396 |
| <i>Aurka</i>         | 0.000175372 | 1.253009885  | 10.52380082 | 9.270790932 |
| <i>Aurkb</i>         | 1.71E-05    | 1.127459129  | 5.262384673 | 4.134925544 |
| <i>Aurkb</i>         | 5.94E-05    | 1.441670224  | 4.208410513 | 2.766740289 |
| <i>Avpr2</i>         | 0.000133793 | 1.112668187  | 6.642843357 | 5.53017517  |
| <i>Avpr2</i>         | 0.012402398 | 1.175596846  | 6.804397952 | 5.628801105 |
| <i>B230311B06Rik</i> | 0.000130696 | 1.2733206    | 6.663353754 | 5.390033154 |
| <i>B230311B06Rik</i> | 0.001854549 | 1.390445153  | 7.276625232 | 5.88618008  |
| <i>B3galt4</i>       | 0.012805837 | -1.110358715 | 3.355823292 | 4.466182007 |
| <i>B3galt4</i>       | 0.010516448 | -1.152080229 | 3.259309764 | 4.411389992 |
| <i>B3galt4</i>       | 0.004322899 | -1.058864343 | 3.665159938 | 4.724024281 |
| <i>B430306N03Rik</i> | 0.000364452 | 2.207283397  | 3.948211776 | 1.740928379 |
| <i>B430306N03Rik</i> | 0.000880909 | 2.106617744  | 3.75922874  | 1.652610996 |
| <i>B430306N03Rik</i> | 0.02338428  | 1.548782915  | 3.681550297 | 2.132767382 |
| <i>B430306N03Rik</i> | 0.006217505 | 1.957465943  | 3.817155882 | 1.859689938 |
| <i>B4galt6</i>       | 0.00037635  | 1.273937489  | 6.476736855 | 5.202799366 |
| <i>BB114814</i>      | 4.85E-05    | 1.309423105  | 4.800452625 | 3.49102952  |
| <i>BC030499</i>      | 0.00154392  | -1.2584955   | 3.2478996   | 4.5063951   |
| <i>BC030499</i>      | 0.006083134 | -1.45672362  | 2.966570367 | 4.423293987 |

|                 |             |              |             |             |
|-----------------|-------------|--------------|-------------|-------------|
| <i>BC030499</i> | 0.004470795 | -1.303859471 | 3.29037885  | 4.594238321 |
| <i>BC030499</i> | 0.000811354 | -1.175113902 | 3.472843278 | 4.64795718  |
| <i>BC048546</i> | 0.020200195 | 1.194254787  | 4.314652799 | 3.120398011 |
| <i>BC049762</i> | 0.01905724  | -1.533204296 | 2.26366262  | 3.796866916 |
| <i>Baiap2l1</i> | 0.004343351 | 1.781632592  | 5.692484578 | 3.910851987 |
| <i>Banp</i>     | 0.000852915 | 1.056734235  | 7.818934924 | 6.762200689 |
| <i>Banp</i>     | 0.018525905 | -1.392280067 | 2.307117151 | 3.699397217 |
| <i>Baz1a</i>    | 2.40E-05    | 1.02589369   | 6.274451765 | 5.248558075 |
| <i>Bbox1</i>    | 4.58E-06    | 2.395479252  | 3.647991535 | 1.252512283 |
| <i>Bbox1</i>    | 0.00058321  | 1.976740759  | 3.951861904 | 1.975121145 |
| <i>Bbox1</i>    | 0.012816951 | 1.692811602  | 3.836348092 | 2.14353649  |
| <i>Bbs10</i>    | 0.000928777 | 1.221267433  | 6.835672003 | 5.614404571 |
| <i>Bbx</i>      | 2.10E-06    | -1.011381646 | 3.9965885   | 5.007970147 |
| <i>Bche</i>     | 0.046707601 | 1.0230817    | 3.742825975 | 2.719744275 |
| <i>Bcl2a1c</i>  | 7.74E-06    | 2.132106355  | 3.794054394 | 1.661948039 |
| <i>Bcl2l11</i>  | 0.003571328 | -1.137286732 | 2.94821079  | 4.085497522 |
| <i>Bend5</i>    | 0.000126393 | -1.125932733 | 5.928072615 | 7.054005349 |
| <i>Bend5</i>    | 5.06E-05    | -1.146748192 | 6.076358429 | 7.223106621 |
| <i>Bgn</i>      | 0.000219083 | 1.221814117  | 11.57209863 | 10.35028452 |
| <i>Bgn</i>      | 2.62E-05    | 1.204677303  | 11.7018236  | 10.4971463  |
| <i>Bin2</i>     | 3.64E-06    | 1.869108984  | 4.672081954 | 2.80297297  |
| <i>Bin2</i>     | 0.000364097 | 2.065097358  | 3.52384879  | 1.458751432 |
| <i>Bin2</i>     | 2.02E-05    | 1.787378815  | 4.887384823 | 3.100006008 |
| <i>Blzf1</i>    | 0.009268625 | 1.583435875  | 3.713935851 | 2.130499977 |
| <i>Bmp1</i>     | 3.75E-05    | 1.051250702  | 8.334380482 | 7.28312978  |
| <i>Bmper</i>    | 0.000138897 | 2.306443992  | 5.011862613 | 2.705418621 |
| <i>Bpi</i>      | 0.010868473 | -1.360009541 | 2.449326195 | 3.809335736 |
| <i>Brca1</i>    | 0.000782932 | 1.215823867  | 4.97551156  | 3.759687693 |
| <i>Brpf3</i>    | 0.039431926 | -1.022770451 | 3.652699979 | 4.67547043  |
| <i>Btg1-ps1</i> | 0.000150468 | -2.284366959 | 2.97431298  | 5.258679938 |
| <i>Bub1b</i>    | 0.005374871 | 1.33077719   | 3.894416543 | 2.563639352 |
| <i>Bub1b</i>    | 0.000968773 | 2.112601563  | 4.098599951 | 1.985998387 |
| <i>C1qa</i>     | 5.05E-08    | 1.631807839  | 9.941808048 | 8.310000209 |
| <i>C1qc</i>     | 5.77E-06    | 1.460558369  | 8.843075224 | 7.382516855 |
| <i>C1qtnf1</i>  | 0.001207333 | 1.142983003  | 4.817544456 | 3.674561453 |
| <i>C1qtnf1</i>  | 0.000649578 | 1.467008751  | 4.681514984 | 3.214506232 |
| <i>C1qtnf1</i>  | 0.001379591 | 1.037001193  | 4.70026165  | 3.663260457 |
| <i>C1qtnf1</i>  | 0.004732932 | 1.516503055  | 4.733532075 | 3.21702902  |
| <i>C3</i>       | 1.61E-06    | 1.613845239  | 9.050385902 | 7.436540663 |
| <i>C3</i>       | 1.44E-07    | 1.869784003  | 11.1604283  | 9.290644298 |
| <i>C3ar1</i>    | 3.67E-06    | 1.324273662  | 6.784050086 | 5.459776424 |
| <i>C4b</i>      | 3.18E-06    | 1.109022927  | 8.123060569 | 7.014037642 |
| <i>C4b</i>      | 1.49E-06    | 1.128434573  | 8.110046052 | 6.981611479 |
| <i>C4b</i>      | 1.75E-05    | 1.160683387  | 8.239831509 | 7.079148123 |
| <i>C4b</i>      | 5.22E-06    | 1.060562438  | 8.099178597 | 7.038616159 |
| <i>C4b</i>      | 1.09E-07    | 1.055960136  | 8.204763658 | 7.148803522 |

|                |             |              |             |              |
|----------------|-------------|--------------|-------------|--------------|
| <i>C4b</i>     | 6.36E-07    | 1.162421283  | 8.238043616 | 7.075622332  |
| <i>C5ar1</i>   | 0.004169366 | 2.310131484  | 5.110363091 | 2.800231607  |
| <i>C5ar1</i>   | 0.000437592 | 2.063665341  | 5.181393497 | 3.117728155  |
| <i>C6</i>      | 0.005899564 | 1.668142037  | 4.232235741 | 2.564093704  |
| <i>C6</i>      | 0.018474166 | 1.378964545  | 3.976009356 | 2.597044811  |
| <i>C6</i>      | 0.001697904 | 2.211565049  | 4.019131759 | 1.80756671   |
| <i>C6</i>      | 0.003334136 | 1.651752273  | 3.834045913 | 2.18229364   |
| <i>C7</i>      | 4.07E-05    | 1.125351192  | 8.631981243 | 7.506630051  |
| <i>C8a</i>     | 0.002542886 | 1.302214027  | 5.466780883 | 4.164566856  |
| <i>Cadps</i>   | 0.01162702  | 1.267922716  | 3.893647411 | 2.625724694  |
| <i>Cadps</i>   | 0.007993029 | 1.228767853  | 4.276268595 | 3.047500742  |
| <i>Calca</i>   | 3.43E-06    | 1.076408289  | 9.330227519 | 8.25381923   |
| <i>Calca</i>   | 9.61E-05    | 1.036913804  | 9.385384204 | 8.348470399  |
| <i>Calcb</i>   | 2.67E-06    | 3.404659049  | 4.56118231  | 1.156523261  |
| <i>Calcb</i>   | 3.36E-05    | 3.113372879  | 4.269023248 | 1.155650369  |
| <i>Camta1</i>  | 0.001678417 | 1.11615712   | 11.86188987 | 10.74573275  |
| <i>Camta1</i>  | 0.001837282 | 1.145016352  | 11.85606334 | 10.711104699 |
| <i>Capn11</i>  | 0.046077359 | -1.311342094 | 2.093449157 | 3.404791252  |
| <i>Capn13</i>  | 0.008080622 | 1.758863578  | 3.541125507 | 1.782261929  |
| <i>Capn13</i>  | 0.003494437 | 1.111747312  | 4.496863859 | 3.385116547  |
| <i>Car13</i>   | 0.00031707  | 1.603243342  | 6.4643123   | 4.861068958  |
| <i>Car4</i>    | 0.003316254 | 1.12763332   | 4.256336275 | 3.128702955  |
| <i>Car8</i>    | 2.63E-06    | 1.393129353  | 6.177336241 | 4.784206888  |
| <i>Card11</i>  | 2.29E-08    | 2.374934463  | 3.84049583  | 1.465561367  |
| <i>Carnmt1</i> | 0.000425557 | -1.055371731 | 5.486451718 | 6.541823448  |
| <i>Casp1</i>   | 2.20E-06    | 1.630751114  | 9.275714219 | 7.644963104  |
| <i>Casp4</i>   | 0.002912891 | 1.348079309  | 4.432935687 | 3.084856377  |
| <i>Casp4</i>   | 0.008395314 | 1.182573257  | 4.488515883 | 3.305942625  |
| <i>Casp4</i>   | 0.003268676 | 1.97454206   | 4.301413545 | 2.326871486  |
| <i>Casp4</i>   | 0.003926309 | 2.228236249  | 4.286288639 | 2.058052389  |
| <i>Cbr2</i>    | 0.002470584 | 1.26817045   | 10.13947863 | 8.87130818   |
| <i>Cbr2</i>    | 1.79E-05    | 1.541917501  | 9.437131547 | 7.895214046  |
| <i>Ccdc114</i> | 7.94E-05    | 1.090294033  | 7.386388679 | 6.296094646  |
| <i>Ccdc134</i> | 0.005158309 | 1.373796185  | 5.304083671 | 3.930287487  |
| <i>Ccdc30</i>  | 0.046179071 | -1.43193208  | 2.388938142 | 3.820870222  |
| <i>Ccdc80</i>  | 5.53E-05    | 1.107489377  | 8.72559867  | 7.618109293  |
| <i>Ccdc80</i>  | 0.000147569 | 1.083238565  | 8.628634426 | 7.545395861  |
| <i>Ccdc80</i>  | 7.65E-05    | 1.199398832  | 8.748317956 | 7.548919124  |
| <i>Ccdc85a</i> | 0.004551097 | 1.445114274  | 3.700209312 | 2.255095038  |
| <i>Cchcr1</i>  | 0.001109113 | -1.741524934 | 2.110820046 | 3.85234498   |
| <i>Ccl12</i>   | 1.36E-06    | 1.55714603   | 5.906156551 | 4.349010521  |
| <i>Ccl2</i>    | 0.002098788 | 1.162722686  | 5.86426474  | 4.701542054  |
| <i>Ccl20</i>   | 9.16E-10    | 3.315470704  | 4.421840704 | 1.10637      |
| <i>Ccl20</i>   | 9.66E-07    | 3.534348509  | 4.625294292 | 1.090945783  |
| <i>Ccl3</i>    | 4.07E-06    | 3.669647965  | 5.097504619 | 1.427856654  |
| <i>Ccl4</i>    | 6.66E-05    | 1.002802129  | 5.391407139 | 4.388605011  |

|                |             |              |             |             |
|----------------|-------------|--------------|-------------|-------------|
| <i>Ccl6</i>    | 3.13E-07    | 1.82698949   | 9.565736409 | 7.73874692  |
| <i>Ccl7</i>    | 7.27E-06    | 1.376359308  | 6.199807703 | 4.823448395 |
| <i>Ccl8</i>    | 0.000102401 | 2.143038609  | 9.400960014 | 7.257921406 |
| <i>Ccna2</i>   | 0.000155017 | 1.77353783   | 6.115114816 | 4.341576986 |
| <i>Ccna2</i>   | 0.000385084 | 1.661825505  | 5.969497412 | 4.307671908 |
| <i>Ccnb1</i>   | 0.000213998 | 1.803481315  | 4.80191242  | 2.998431106 |
| <i>Ccne2</i>   | 0.01206552  | 1.323850939  | 4.126612676 | 2.802761737 |
| <i>Ccne2</i>   | 0.00037542  | 1.342435626  | 4.427185983 | 3.084750357 |
| <i>Ccne2</i>   | 0.001065991 | 1.214524331  | 4.29958512  | 3.085060788 |
| <i>Ccnf</i>    | 0.00136289  | 1.422716885  | 4.52281569  | 3.100098805 |
| <i>Ccr2</i>    | 0.003319892 | 1.26954201   | 5.583937082 | 4.314395072 |
| <i>Ccr2</i>    | 0.000123131 | 1.461205842  | 5.590477366 | 4.129271524 |
| <i>Ccr2</i>    | 0.002622817 | 1.070551976  | 5.505120281 | 4.434568305 |
| <i>Ccr5</i>    | 1.58E-06    | 1.510971707  | 5.248909931 | 3.737938224 |
| <i>Cct6b</i>   | 0.014986984 | -1.110899755 | 3.171844841 | 4.282744596 |
| <i>Cd14</i>    | 8.38E-07    | 1.447065539  | 7.726063014 | 6.278997475 |
| <i>Cd163</i>   | 0.002315166 | 1.274864494  | 4.053213376 | 2.778348881 |
| <i>Cd163</i>   | 0.006527259 | 1.592154982  | 4.406408935 | 2.814253952 |
| <i>Cd177</i>   | 0.007283475 | -1.522633579 | 4.496877166 | 6.019510745 |
| <i>Cd177</i>   | 0.000542165 | -1.299836829 | 4.938239831 | 6.23807666  |
| <i>Cd177</i>   | 0.000612025 | -1.281272575 | 5.005587321 | 6.286859896 |
| <i>Cd180</i>   | 0.005830928 | 1.594652766  | 3.507056322 | 1.912403555 |
| <i>Cd180</i>   | 0.001263333 | 1.457979507  | 3.659966233 | 2.201986725 |
| <i>Cd200r1</i> | 8.64E-06    | 2.53059244   | 3.761281067 | 1.230688627 |
| <i>Cd209a</i>  | 4.40E-05    | 1.809710726  | 5.432230597 | 3.622519871 |
| <i>Cd22</i>    | 0.005005349 | 1.463485544  | 4.61450956  | 3.151024016 |
| <i>Cd22</i>    | 0.001745189 | 1.042892774  | 4.931459618 | 3.888566843 |
| <i>Cd22</i>    | 0.001200648 | 1.086571723  | 4.853713549 | 3.767141826 |
| <i>Cd226</i>   | 0.018029971 | 1.312173555  | 4.41605494  | 3.103881385 |
| <i>Cd226</i>   | 0.000466942 | 1.122041789  | 3.887373573 | 2.765331784 |
| <i>Cd226</i>   | 0.006816653 | 1.280609446  | 4.157139541 | 2.876530095 |
| <i>Cd27</i>    | 0.000461996 | -1.36958618  | 3.494757016 | 4.864343197 |
| <i>Cd27</i>    | 0.000102871 | -1.222912511 | 3.797903282 | 5.020815792 |
| <i>Cd27</i>    | 0.033702557 | -1.055170301 | 3.437289151 | 4.492459452 |
| <i>Cd27</i>    | 0.003275579 | -1.349403191 | 3.880097333 | 5.229500524 |
| <i>Cd300a</i>  | 0.001693155 | 2.521835433  | 4.391333992 | 1.869498558 |
| <i>Cd300a</i>  | 9.02E-05    | 2.260616966  | 4.394872818 | 2.134255852 |
| <i>Cd300a</i>  | 0.01066089  | 1.581101299  | 4.198828607 | 2.617727308 |
| <i>Cd300lb</i> | 0.000299475 | 2.127121137  | 3.628816636 | 1.501695499 |
| <i>Cd300lf</i> | 6.21E-07    | -1.663493666 | 6.76533052  | 8.428824185 |
| <i>Cd300lf</i> | 1.91E-06    | -1.757698135 | 5.72190689  | 7.479605026 |
| <i>Cd33</i>    | 2.02E-06    | 1.161906757  | 7.401438747 | 6.239531991 |
| <i>Cd33</i>    | 5.11E-06    | 1.156352696  | 7.413652292 | 6.257299596 |
| <i>Cd37</i>    | 8.68E-05    | 1.905492311  | 6.098102044 | 4.192609733 |
| <i>Cd37</i>    | 2.90E-05    | 1.49019207   | 5.853345503 | 4.363153433 |
| <i>Cd37</i>    | 4.59E-06    | 1.69741063   | 5.879786965 | 4.182376335 |

|                 |             |              |             |             |
|-----------------|-------------|--------------|-------------|-------------|
| <i>Cd38</i>     | 0.002913524 | 1.244162292  | 4.698145634 | 3.453983341 |
| <i>Cd3g</i>     | 0.000165333 | 1.764364881  | 4.795264676 | 3.030899795 |
| <i>Cd44</i>     | 2.04E-08    | 2.602550016  | 9.413822581 | 6.811272565 |
| <i>Cd44</i>     | 4.85E-08    | 2.485375741  | 9.310293885 | 6.824918144 |
| <i>Cd44</i>     | 5.55E-07    | 2.987457505  | 9.538537662 | 6.551080156 |
| <i>Cd44</i>     | 9.62E-09    | 3.000769242  | 9.706247046 | 6.705477803 |
| <i>Cd44</i>     | 3.34E-08    | 2.552510676  | 9.471747805 | 6.919237128 |
| <i>Cd44</i>     | 1.57E-07    | 2.737556761  | 9.470138461 | 6.7325817   |
| <i>Cd44</i>     | 9.38E-08    | 2.599521118  | 9.471110741 | 6.871589623 |
| <i>Cd44</i>     | 8.75E-09    | 2.779004133  | 9.440756428 | 6.661752295 |
| <i>Cd44</i>     | 1.17E-08    | 2.858794213  | 9.534782913 | 6.675988699 |
| <i>Cd44</i>     | 7.32E-09    | 2.643649085  | 9.532797913 | 6.889148828 |
| <i>Cd44</i>     | 2.35E-08    | 2.835187873  | 9.686052801 | 6.850864928 |
| <i>Cd47</i>     | 1.78E-05    | 1.005351889  | 7.596347206 | 6.590995317 |
| <i>Cd47</i>     | 0.000248081 | 1.03395994   | 7.58711288  | 6.553152939 |
| <i>Cd47</i>     | 1.25E-05    | 1.179401445  | 7.777883849 | 6.598482404 |
| <i>Cd47</i>     | 0.000135163 | 1.106376134  | 7.699275881 | 6.592899747 |
| <i>Cd47</i>     | 0.000384664 | 1.204772969  | 7.794253572 | 6.589480603 |
| <i>Cd47</i>     | 7.05E-05    | 1.142563453  | 7.786601604 | 6.644038152 |
| <i>Cd47</i>     | 6.03E-07    | 1.069693277  | 7.574026082 | 6.504332805 |
| <i>Cd48</i>     | 1.83E-06    | 1.864528652  | 7.152708581 | 5.288179929 |
| <i>Cd53</i>     | 6.84E-07    | 1.785079388  | 7.100446207 | 5.315366819 |
| <i>Cd68</i>     | 1.23E-05    | 1.444950673  | 7.907684508 | 6.462733835 |
| <i>Cd68</i>     | 9.06E-05    | 1.097567715  | 7.881298425 | 6.78373071  |
| <i>Cd72</i>     | 5.07E-05    | 1.858501472  | 6.655152963 | 4.796651491 |
| <i>Cd72</i>     | 0.000214525 | 2.038371583  | 6.461746302 | 4.423374719 |
| <i>Cd72</i>     | 0.012526287 | -1.023388443 | 2.996482561 | 4.019871003 |
| <i>Cd72</i>     | 3.85E-05    | 1.794249615  | 6.461797177 | 4.667547562 |
| <i>Cd74</i>     | 3.56E-08    | 2.317816621  | 11.21629983 | 8.898483209 |
| <i>Cd74</i>     | 1.85E-08    | 2.378870804  | 11.27514472 | 8.896273921 |
| <i>Cd79b</i>    | 0.004379557 | 1.995657117  | 4.017014604 | 2.021357487 |
| <i>Cd79b</i>    | 1.05E-05    | 2.599928714  | 4.087279823 | 1.48735111  |
| <i>Cd80</i>     | 0.029386147 | 1.924534834  | 4.331229047 | 2.406694213 |
| <i>Cd80</i>     | 0.028470375 | 1.514363783  | 3.967034326 | 2.452670543 |
| <i>Cd83</i>     | 0.000993053 | 1.03119224   | 3.970908538 | 2.939716297 |
| <i>Cd83</i>     | 0.021854999 | 1.361983477  | 4.013423664 | 2.651440187 |
| <i>Cd84</i>     | 0.000425873 | 1.242217303  | 5.315933336 | 4.073716033 |
| <i>Cd84</i>     | 0.00108915  | 1.136114714  | 5.071146793 | 3.935032079 |
| <i>Cd86</i>     | 0.01449442  | 1.140499008  | 4.576574134 | 3.436075126 |
| <i>Cd86</i>     | 0.002045661 | 1.585757248  | 4.559424092 | 2.973666843 |
| <i>Cd86</i>     | 0.002786089 | 1.267314683  | 4.614252601 | 3.346937919 |
| <i>Cd86</i>     | 0.001538096 | 1.472916449  | 4.63764257  | 3.164726121 |
| <i>Cd8a</i>     | 0.000143164 | -1.109930557 | 5.011154167 | 6.121084724 |
| <i>Cd93</i>     | 2.05E-06    | 1.243407947  | 8.314776102 | 7.071368154 |
| <i>Cdc20</i>    | 0.048467208 | 1.01768016   | 4.326246665 | 3.308566505 |
| <i>Cdc42ep4</i> | 6.27E-06    | 1.367556661  | 9.339850261 | 7.9722936   |

|                 |             |              |             |             |
|-----------------|-------------|--------------|-------------|-------------|
| <i>Cdca2</i>    | 0.000309497 | 1.295180828  | 3.934687308 | 2.639506479 |
| <i>Cdca2</i>    | 0.008160805 | 1.956012997  | 4.046464925 | 2.090451928 |
| <i>Cdh18</i>    | 4.60E-06    | 1.349579556  | 8.525358791 | 7.175779234 |
| <i>Cdh18</i>    | 2.39E-06    | 1.374610362  | 8.869489    | 7.494878639 |
| <i>Cdh18</i>    | 0.025055682 | 1.845639442  | 7.849866332 | 6.00422689  |
| <i>Cdh18</i>    | 1.01E-05    | 1.496902385  | 8.789543571 | 7.292641186 |
| <i>Cdh18</i>    | 0.001279646 | 1.492361184  | 8.149213783 | 6.656852599 |
| <i>Cdo1</i>     | 0.001120972 | 4.664678909  | 10.98860238 | 6.323923474 |
| <i>Cdo1</i>     | 0.001501393 | 4.508263869  | 10.76272622 | 6.254462353 |
| <i>Ceacam10</i> | 0.020587271 | 1.783050978  | 6.139714118 | 4.356663139 |
| <i>Ceacam10</i> | 0.024794944 | 1.684231698  | 5.981250348 | 4.297018651 |
| <i>Ceacam13</i> | 0.000185223 | 3.804344623  | 5.266251866 | 1.461907243 |
| <i>Ceacam13</i> | 5.65E-06    | 3.710981881  | 4.849991033 | 1.139009151 |
| <i>Ceacam16</i> | 0.00106889  | -1.175508447 | 3.209559148 | 4.385067596 |
| <i>Ceacam19</i> | 0.002588657 | 1.882222191  | 3.969988677 | 2.087766486 |
| <i>Ceacam19</i> | 0.027334118 | 1.129773746  | 3.867785951 | 2.738012205 |
| <i>Ceacam5</i>  | 0.00034928  | -1.060472559 | 3.701651958 | 4.762124517 |
| <i>Ceacam5</i>  | 0.000543603 | -1.280426889 | 3.549448235 | 4.829875123 |
| <i>Cebpa</i>    | 0.000165688 | 1.658914819  | 7.364825463 | 5.705910645 |
| <i>Cebpa</i>    | 0.000263293 | 1.637310479  | 7.294235151 | 5.656924672 |
| <i>Cebpa</i>    | 2.34E-05    | 1.722829521  | 7.299055887 | 5.576226366 |
| <i>Cebpa</i>    | 0.000237637 | 1.628168916  | 7.273029187 | 5.64486027  |
| <i>Cebpa</i>    | 0.00010082  | 1.77319411   | 7.295325547 | 5.522131437 |
| <i>Celf4</i>    | 0.005316077 | -1.116190717 | 4.301226432 | 5.417417149 |
| <i>Cenpa</i>    | 0.000211076 | 1.325545762  | 7.50860466  | 6.183058898 |
| <i>Cenpe</i>    | 0.004244227 | 1.664253014  | 3.915810362 | 2.251557348 |
| <i>Cenpe</i>    | 0.014726236 | 1.792359065  | 4.000916176 | 2.208557111 |
| <i>Cenpf</i>    | 0.000518926 | 1.900060795  | 5.156239666 | 3.25617887  |
| <i>Cenpf</i>    | 0.000669098 | 1.611032029  | 5.361916679 | 3.75088465  |
| <i>Cenpf</i>    | 0.000630227 | 1.158665593  | 5.185403177 | 4.026737584 |
| <i>Cenpi</i>    | 1.72E-05    | 1.613886109  | 9.334036336 | 7.720150227 |
| <i>Cenpm</i>    | 0.009005197 | 1.190166216  | 3.565032156 | 2.374865941 |
| <i>Cenpu</i>    | 8.72E-05    | -1.560528342 | 3.80113928  | 5.361667621 |
| <i>Cenpu</i>    | 0.006011066 | -1.649215943 | 3.736741378 | 5.385957321 |
| <i>Cep112</i>   | 0.000148749 | -1.035652893 | 4.707440089 | 5.743092982 |
| <i>Cep41</i>    | 0.001078212 | -1.213428839 | 4.09626101  | 5.309689848 |
| <i>Cep55</i>    | 0.009068929 | 1.794078786  | 3.815505814 | 2.021427028 |
| <i>Cep55</i>    | 0.000302393 | 1.996180887  | 3.86372016  | 1.867539273 |
| <i>Cep55</i>    | 0.001175995 | 2.076353615  | 3.734256865 | 1.65790325  |
| <i>Cep55</i>    | 0.001186312 | 1.536448783  | 3.765045783 | 2.228597    |
| <i>Cep55</i>    | 0.000260529 | 2.334031721  | 3.701412146 | 1.367380424 |
| <i>Cep55</i>    | 0.005078016 | 1.955050472  | 3.527490363 | 1.572439891 |
| <i>Cep55</i>    | 0.009549539 | 1.769551724  | 3.854563639 | 2.085011914 |
| <i>Cep70</i>    | 0.000430647 | -1.153626095 | 3.157004192 | 4.310630287 |
| <i>Ces1b</i>    | 0.000199894 | 1.404339422  | 3.509269989 | 2.104930568 |
| <i>Ces3b</i>    | 0.006175136 | -1.054439071 | 3.820846252 | 4.875285323 |



|                |             |              |             |             |
|----------------|-------------|--------------|-------------|-------------|
| <i>Ces3b</i>   | 0.003231955 | -1.173156185 | 3.65708279  | 4.830238975 |
| <i>Ces3b</i>   | 0.00397303  | -1.339117362 | 3.213408229 | 4.552525592 |
| <i>Ces3b</i>   | 0.001002596 | -1.102267367 | 3.846634672 | 4.948902039 |
| <i>Ces3b</i>   | 0.001750358 | -1.158458292 | 3.713578432 | 4.872036724 |
| <i>Cfb</i>     | 9.60E-06    | 1.724989697  | 6.371723887 | 4.64673419  |
| <i>Cfb</i>     | 4.93E-05    | 1.751184453  | 6.29984012  | 4.548655667 |
| <i>Cfb</i>     | 1.16E-05    | 1.767721172  | 6.421333438 | 4.653612266 |
| <i>Cfb</i>     | 0.000158657 | 1.675305951  | 6.350819216 | 4.675513265 |
| <i>Cfb</i>     | 1.92E-06    | 1.893227684  | 6.578661474 | 4.68543379  |
| <i>Cfb</i>     | 1.60E-07    | 1.838518832  | 6.517237506 | 4.678718674 |
| <i>Cfb</i>     | 2.31E-06    | 1.827887808  | 6.381531535 | 4.553643727 |
| <i>Cfb</i>     | 4.95E-06    | 1.984885289  | 6.39281036  | 4.40792507  |
| <i>Cfb</i>     | 1.13E-06    | 2.059156897  | 6.482500572 | 4.423343675 |
| <i>Cfb</i>     | 0.000212436 | 1.783386885  | 6.434866116 | 4.651479231 |
| <i>Cfp</i>     | 1.44E-05    | 1.018389057  | 7.625436825 | 6.607047768 |
| <i>Ch25h</i>   | 0.020266014 | 1.60572183   | 3.979529919 | 2.373808089 |
| <i>Chac1</i>   | 6.17E-05    | -1.002545768 | 10.60641983 | 11.6089656  |
| <i>Chdh</i>    | 3.56E-07    | 1.221139727  | 6.346939792 | 5.125800065 |
| <i>Chdh</i>    | 0.000538824 | 1.151371309  | 6.31817875  | 5.166807441 |
| <i>Chdh</i>    | 6.90E-05    | 1.0619833    | 6.332686886 | 5.270703586 |
| <i>Chil1</i>   | 0.001495698 | 2.37121226   | 4.407012619 | 2.035800359 |
| <i>Chil1</i>   | 0.006153789 | 2.205347723  | 3.91770278  | 1.712355058 |
| <i>Chil1</i>   | 0.001477708 | 1.246128987  | 4.175854824 | 2.929725837 |
| <i>Chil5</i>   | 0.005873089 | -1.029879637 | 2.823149223 | 3.853028861 |
| <i>Chn1</i>    | 1.20E-07    | -1.071813698 | 6.47399415  | 7.545807848 |
| <i>Chrdl2</i>  | 0.000295327 | -1.249421316 | 4.652306991 | 5.901728306 |
| <i>Chrdl2</i>  | 0.001770189 | -1.225892952 | 4.822206616 | 6.048099568 |
| <i>Chrdl2</i>  | 0.012135406 | -1.219890075 | 5.003502504 | 6.223392579 |
| <i>Chrm5</i>   | 1.43E-06    | -2.061395117 | 3.433206805 | 5.494601923 |
| <i>Chrna9</i>  | 0.002441754 | -1.498506235 | 2.135715224 | 3.634221459 |
| <i>Ciita</i>   | 2.55E-06    | 1.945649125  | 6.500637457 | 4.554988332 |
| <i>Ciita</i>   | 6.85E-06    | 1.887841198  | 6.490946832 | 4.603105635 |
| <i>Ciita</i>   | 1.06E-06    | 1.821400183  | 6.598871458 | 4.777471275 |
| <i>Ciita</i>   | 0.000102226 | 1.655386257  | 6.452492792 | 4.797106534 |
| <i>Ciita</i>   | 3.25E-06    | 1.700802533  | 6.420192409 | 4.719389876 |
| <i>Ciita</i>   | 5.36E-06    | 1.695186102  | 6.388660115 | 4.693474013 |
| <i>Ciita</i>   | 2.10E-06    | 1.631506427  | 6.397483808 | 4.765977381 |
| <i>Cirbp</i>   | 0.000358364 | -1.035692828 | 9.636981705 | 10.67267453 |
| <i>Cirbp</i>   | 0.001256323 | -1.206704414 | 9.574856526 | 10.78156094 |
| <i>Cit</i>     | 0.004856603 | 1.321874236  | 3.43525627  | 2.113382033 |
| <i>Cit</i>     | 0.001992724 | 1.818768896  | 3.314563724 | 1.495794828 |
| <i>Ckap2</i>   | 0.000147858 | 1.115428917  | 5.826130585 | 4.710701668 |
| <i>Clca1</i>   | 0.000327213 | 1.519715434  | 3.888216324 | 2.36850089  |
| <i>Clca3a1</i> | 2.03E-05    | 3.631553637  | 6.969370064 | 3.337816427 |
| <i>Clca3a2</i> | 7.01E-05    | 3.119582554  | 7.588651011 | 4.469068457 |
| <i>Clcf1</i>   | 4.16E-05    | 1.429935662  | 3.609262335 | 2.179326673 |

|                 |             |              |             |             |
|-----------------|-------------|--------------|-------------|-------------|
| <i>Cldn15</i>   | 0.006236987 | 1.32279309   | 3.084889069 | 1.76209598  |
| <i>Clec12a</i>  | 0.000245946 | 1.571044604  | 5.156321928 | 3.585277324 |
| <i>Clec2g</i>   | 0.000194436 | -1.400095526 | 5.97999802  | 7.380093546 |
| <i>Clec2g</i>   | 0.000103734 | -1.510635146 | 6.050688908 | 7.561324054 |
| <i>Clec2g</i>   | 0.00010634  | -1.276939598 | 6.135542499 | 7.412482097 |
| <i>Clec2g</i>   | 0.001049179 | -1.277101996 | 6.155609431 | 7.432711427 |
| <i>Clec4a1</i>  | 0.000146252 | 1.384738466  | 5.934228483 | 4.549490017 |
| <i>Clec4a2</i>  | 0.000647184 | 1.38782971   | 5.964090987 | 4.576261278 |
| <i>Clec4a3</i>  | 0.000173111 | 1.894294407  | 6.075346529 | 4.181052122 |
| <i>Clec4a3</i>  | 8.25E-06    | 1.630066631  | 6.106429369 | 4.476362738 |
| <i>Clec4n</i>   | 0.000436547 | 4.079619633  | 5.870024642 | 1.790405009 |
| <i>Clec4n</i>   | 0.000181659 | 3.249379854  | 5.789559351 | 2.540179497 |
| <i>Clec4n</i>   | 3.71E-05    | 2.747164148  | 5.861060395 | 3.113896247 |
| <i>Clec5a</i>   | 0.029448132 | -1.114276918 | 3.131141502 | 4.24541842  |
| <i>Clec7a</i>   | 0.001726394 | 1.295146526  | 5.945924306 | 4.65077778  |
| <i>Clip4</i>    | 0.00048183  | 2.256200115  | 4.11034959  | 1.854149474 |
| <i>Clip4</i>    | 0.006752236 | 1.555250758  | 4.162311665 | 2.607060907 |
| <i>Clip4</i>    | 0.004460168 | 1.218264119  | 3.655541958 | 2.437277839 |
| <i>Clip4</i>    | 0.007031759 | 1.760435098  | 3.885050271 | 2.124615173 |
| <i>Clip4</i>    | 0.014619656 | 1.10733066   | 3.681776692 | 2.574446032 |
| <i>Clip4</i>    | 0.002234243 | 1.818555637  | 3.792098463 | 1.973542826 |
| <i>Clip4</i>    | 0.001180579 | 2.302190945  | 3.682315889 | 1.380124944 |
| <i>Clip4</i>    | 0.000683127 | 2.369732006  | 4.05377799  | 1.684045984 |
| <i>Clip4</i>    | 0.000220288 | 1.571453622  | 3.780699834 | 2.209246213 |
| <i>Clip4</i>    | 0.002035337 | 2.574257162  | 4.157745549 | 1.583488386 |
| <i>Clip4</i>    | 0.005213224 | 2.041490934  | 4.30874568  | 2.267254746 |
| <i>Clip4</i>    | 7.57E-05    | 1.637280284  | 4.290440667 | 2.653160383 |
| <i>Clmn</i>     | 0.000495232 | 2.109076966  | 3.797741654 | 1.688664688 |
| <i>Clmn</i>     | 0.000841054 | 2.086887597  | 3.285529104 | 1.198641507 |
| <i>Cln3</i>     | 0.026870683 | -1.526809537 | 1.963906017 | 3.490715554 |
| <i>Clnk</i>     | 0.015273152 | -1.529256524 | 1.944082333 | 3.473338857 |
| <i>Clu</i>      | 4.04E-05    | 3.892916805  | 6.85350222  | 2.960585414 |
| <i>Clu</i>      | 2.13E-08    | 6.840066432  | 14.28873086 | 7.448664425 |
| <i>Clu</i>      | 1.18E-08    | 6.848565821  | 14.13741701 | 7.288851192 |
| <i>Cmpk2</i>    | 0.000185831 | 1.259352923  | 6.5885309   | 5.329177977 |
| <i>Cmtm2b</i>   | 0.005405432 | -1.068828073 | 4.536861727 | 5.6056898   |
| <i>Cmtm3</i>    | 3.23E-05    | 1.006040134  | 7.200588227 | 6.194548093 |
| <i>Cmtm3</i>    | 0.000115111 | 1.023059235  | 7.132177352 | 6.109118117 |
| <i>Cmtm3</i>    | 3.36E-06    | 1.011024199  | 7.09032323  | 6.079299031 |
| <i>Cmtm5</i>    | 0.016888094 | -1.453413402 | 2.174999915 | 3.628413318 |
| <i>Cntnap5c</i> | 0.00473376  | 1.729036663  | 3.630910572 | 1.90187391  |
| <i>Cobl</i>     | 0.004922719 | 1.398068813  | 4.40852855  | 3.010459737 |
| <i>Col11a1</i>  | 0.006390066 | 1.565963073  | 3.420517802 | 1.85455473  |
| <i>Col13a1</i>  | 0.000994321 | -1.421313996 | 2.960212915 | 4.381526911 |
| <i>Col15a1</i>  | 3.89E-07    | 1.008575713  | 9.134503527 | 8.125927814 |
| <i>Col17a1</i>  | 0.000783664 | 1.034778059  | 6.434393761 | 5.399615702 |

|               |             |              |             |             |
|---------------|-------------|--------------|-------------|-------------|
| <i>Col1a1</i> | 0.002550307 | 1.046476358  | 6.926415886 | 5.879939528 |
| <i>Col1a2</i> | 0.000153163 | 1.3213268    | 9.292876238 | 7.971549438 |
| <i>Col3a1</i> | 3.89E-05    | 1.163711788  | 12.27046643 | 11.10675464 |
| <i>Col5a2</i> | 6.39E-05    | 1.103644198  | 9.033810025 | 7.930165827 |
| <i>Col6a3</i> | 0.000213404 | 1.069738336  | 6.453766338 | 5.384028002 |
| <i>Col6a5</i> | 2.97E-05    | 1.062159447  | 7.133488747 | 6.0713293   |
| <i>Copa</i>   | 1.69E-06    | -1.400540954 | 8.089038736 | 9.48957969  |
| <i>Coro1a</i> | 1.52E-06    | 1.488977044  | 7.636924365 | 6.147947321 |
| <i>Coro1a</i> | 1.15E-06    | 1.699631182  | 7.673124447 | 5.973493265 |
| <i>Coro1a</i> | 9.65E-06    | 1.678789751  | 7.839833373 | 6.161043621 |
| <i>Coro1a</i> | 8.67E-06    | 1.832349835  | 7.933243692 | 6.100893856 |
| <i>Coro2b</i> | 7.67E-05    | 1.18646062   | 10.67897599 | 9.492515367 |
| <i>Coro2b</i> | 5.20E-05    | 1.16442203   | 10.61171418 | 9.447292147 |
| <i>Coro2b</i> | 0.000600399 | 1.375822087  | 10.47966757 | 9.103845481 |
| <i>Coro2b</i> | 6.78E-06    | 1.259895447  | 10.52821085 | 9.268315404 |
| <i>Coro2b</i> | 8.29E-06    | 1.283114285  | 10.53906882 | 9.255954538 |
| <i>Cotl1</i>  | 0.000843929 | 1.719157473  | 8.140569628 | 6.421412155 |
| <i>Cp</i>     | 4.97E-06    | 1.199396298  | 8.935565442 | 7.736169144 |
| <i>Cp</i>     | 6.36E-06    | 1.259893025  | 9.182082814 | 7.92218979  |
| <i>Cp</i>     | 8.10E-06    | 1.225160452  | 9.073126381 | 7.847965928 |
| <i>Cp</i>     | 3.09E-05    | 1.295272756  | 8.962365397 | 7.667092641 |
| <i>Cp</i>     | 0.000121512 | 1.019728056  | 8.862891293 | 7.843163236 |
| <i>Cp</i>     | 3.11E-06    | 1.412069725  | 9.204081584 | 7.792011859 |
| <i>Cpe</i>    | 1.95E-05    | 1.688893029  | 10.5455986  | 8.856705575 |
| <i>Cpeb3</i>  | 0.001804449 | -1.079650559 | 5.522156582 | 6.60180714  |
| <i>Cpeb3</i>  | 0.000586345 | -1.028343344 | 5.501666145 | 6.530009489 |
| <i>Cpeb3</i>  | 3.84E-05    | -1.115363897 | 5.396652677 | 6.512016574 |
| <i>Cpn2</i>   | 1.46E-05    | -1.123253132 | 6.449361602 | 7.572614734 |
| <i>Cpne4</i>  | 3.38E-05    | 2.161987091  | 3.464831039 | 1.302843948 |
| <i>Crif1</i>  | 0.000999648 | 3.440161558  | 5.067133159 | 1.626971601 |
| <i>Crif1</i>  | 0.000419542 | 3.491931828  | 5.029053874 | 1.537122046 |
| <i>Crif1</i>  | 0.002466977 | 3.221789209  | 4.788553659 | 1.56676445  |
| <i>Crif1</i>  | 0.002687608 | 3.21413503   | 4.968996802 | 1.754861771 |
| <i>Csf1</i>   | 4.93E-05    | 1.067677488  | 7.606124403 | 6.538446915 |
| <i>Csf1r</i>  | 3.86E-07    | 1.509917755  | 8.024074033 | 6.514156278 |
| <i>Csf1r</i>  | 1.39E-05    | 1.218817724  | 7.85955296  | 6.640735236 |
| <i>Csf1r</i>  | 4.41E-05    | 1.151015559  | 7.771605426 | 6.620589867 |
| <i>Csf1r</i>  | 3.51E-07    | 1.329452133  | 7.901000067 | 6.571547934 |
| <i>Csf1r</i>  | 1.09E-05    | 1.374751345  | 8.026399544 | 6.651648199 |
| <i>Csf1r</i>  | 8.29E-07    | 1.279335084  | 7.943186189 | 6.663851105 |
| <i>Csf2rb</i> | 8.52E-07    | 1.398808916  | 7.365110378 | 5.966301462 |
| <i>Csf3r</i>  | 0.00130292  | 1.96488758   | 4.654964525 | 2.690076945 |
| <i>Csf3r</i>  | 0.000208876 | 3.171145939  | 4.7000148   | 1.528868861 |
| <i>Csf3r</i>  | 0.001920901 | 2.448048029  | 4.653126898 | 2.205078869 |
| <i>Csf3r</i>  | 0.000275642 | 2.428019263  | 4.473183782 | 2.045164519 |
| <i>Csf3r</i>  | 0.001406336 | 2.670389297  | 4.96487279  | 2.294483494 |

|               |             |              |             |             |
|---------------|-------------|--------------|-------------|-------------|
| <i>Csf3r</i>  | 0.000266989 | 3.106173369  | 4.775977999 | 1.66980463  |
| <i>Csf3r</i>  | 7.18E-05    | 2.650678306  | 4.929679955 | 2.279001649 |
| <i>Csf3r</i>  | 0.002401014 | 2.630562463  | 4.67274107  | 2.042178607 |
| <i>Csf3r</i>  | 0.000240974 | 2.8737077    | 4.450950913 | 1.577243213 |
| <i>Csf3r</i>  | 3.43E-06    | 3.580915211  | 4.955612074 | 1.374696863 |
| <i>Csf3r</i>  | 0.000349615 | 3.28685472   | 4.875644609 | 1.588789889 |
| <i>Csf3r</i>  | 8.80E-05    | 3.027292899  | 4.600528803 | 1.573235904 |
| <i>Csf3r</i>  | 2.39E-05    | 1.628972891  | 4.846973967 | 3.218001077 |
| <i>Csf3r</i>  | 2.55E-05    | 2.866930088  | 4.879893369 | 2.012963281 |
| <i>Csf3r</i>  | 0.010026829 | 1.978487481  | 4.672718865 | 2.694231383 |
| <i>Csf3r</i>  | 0.000551992 | 3.085446508  | 4.760304752 | 1.674858244 |
| <i>Csf3r</i>  | 0.000415117 | 2.202519562  | 4.598240677 | 2.395721115 |
| <i>Csf3r</i>  | 9.02E-06    | 2.095570541  | 4.766708412 | 2.671137871 |
| <i>Csf3r</i>  | 0.000246913 | 2.337063004  | 4.572879033 | 2.23581603  |
| <i>Csn3</i>   | 0.000182232 | 1.120066885  | 12.187742   | 11.06767512 |
| <i>Csnk1e</i> | 0.022285716 | 1.004169168  | 3.505513472 | 2.501344305 |
| <i>Cst8</i>   | 0.0288678   | -1.783810327 | 1.780579908 | 3.564390235 |
| <i>Ctgf</i>   | 0.007039538 | 1.272459952  | 9.754599988 | 8.482140036 |
| <i>Cthrc1</i> | 0.002806662 | 2.33127449   | 4.546090395 | 2.214815905 |
| <i>Cthrc1</i> | 0.0012448   | 2.961709431  | 4.811670742 | 1.849961311 |
| <i>Cthrc1</i> | 0.005262325 | 2.91414336   | 4.708546648 | 1.794403288 |
| <i>Ctla2b</i> | 0.004300869 | 1.0455676    | 9.204477417 | 8.158909816 |
| <i>Ctla2b</i> | 0.000941623 | 1.108576386  | 9.126638172 | 8.018061785 |
| <i>Ctse</i>   | 3.90E-05    | 2.260648026  | 6.235633531 | 3.974985505 |
| <i>Ctsh</i>   | 4.34E-06    | 1.397419169  | 8.579313357 | 7.181894188 |
| <i>Ctsh</i>   | 5.35E-05    | 1.272553268  | 8.394202542 | 7.121649274 |
| <i>Ctss</i>   | 3.77E-07    | 2.046024333  | 7.738048204 | 5.69202387  |
| <i>Ctss</i>   | 3.37E-06    | 2.255017171  | 7.822063737 | 5.567046566 |
| <i>Ctss</i>   | 1.10E-06    | 1.894847669  | 10.53435582 | 8.639508154 |
| <i>Cul9</i>   | 0.005712059 | -1.231527122 | 3.597134882 | 4.828662005 |
| <i>Cwc27</i>  | 0.035753909 | -1.310205826 | 1.901860048 | 3.212065874 |
| <i>Cwh43</i>  | 0.007039917 | 2.539127478  | 4.235854046 | 1.696726569 |
| <i>Cwh43</i>  | 0.001644628 | 2.86310463   | 4.154041325 | 1.290936694 |
| <i>Cx3cr1</i> | 0.000523421 | 1.373700776  | 6.65924278  | 5.285542005 |
| <i>Cxadr</i>  | 1.64E-06    | 1.788859536  | 6.528638005 | 4.739778469 |
| <i>Cxadr</i>  | 4.50E-06    | 1.294358502  | 7.889429852 | 6.59507135  |
| <i>Cxcl1</i>  | 0.001001059 | 2.416791034  | 3.572093412 | 1.155302378 |
| <i>Cxcl13</i> | 0.00074012  | 1.488615281  | 7.530215078 | 6.041599797 |
| <i>Cxcl15</i> | 1.31E-06    | -1.120079075 | 8.905844899 | 10.02592397 |
| <i>Cxcl16</i> | 1.06E-07    | 2.341067566  | 10.41102947 | 8.069961909 |
| <i>Cxcl16</i> | 6.34E-08    | 2.042941038  | 11.40829871 | 9.365357675 |
| <i>Cxcl16</i> | 5.90E-07    | 1.803978062  | 11.16821055 | 9.364232489 |
| <i>Cxcl2</i>  | 0.00012654  | 2.930171853  | 4.273692416 | 1.343520563 |
| <i>Cxcl5</i>  | 5.86E-06    | 1.135256671  | 4.834755921 | 3.699499249 |
| <i>Cxcl5</i>  | 2.10E-06    | 1.720612674  | 4.842958898 | 3.122346223 |
| <i>Cxcr4</i>  | 0.001353324 | 2.4896902    | 4.371060666 | 1.881370466 |

|                      |             |              |             |             |
|----------------------|-------------|--------------|-------------|-------------|
| <i>Cxcr4</i>         | 0.000721855 | 2.453784135  | 4.111664271 | 1.657880136 |
| <i>Cxcr4</i>         | 1.60E-06    | 1.795841691  | 5.454498701 | 3.65865701  |
| <i>Cyb5a</i>         | 8.61E-06    | -3.046427778 | 4.684813889 | 7.731241667 |
| <i>Cym</i>           | 0.018112666 | -1.068224466 | 2.832919719 | 3.901144184 |
| <i>Cyp27a1</i>       | 3.36E-05    | 1.062082549  | 6.923718984 | 5.861636435 |
| <i>Cyp2b10</i>       | 2.61E-05    | 4.176035396  | 6.352502181 | 2.176466785 |
| <i>Cyp2b13</i>       | 0.001987953 | 1.865916598  | 3.577275389 | 1.711358791 |
| <i>Cyp2b13</i>       | 0.000115045 | 2.502415883  | 3.548343324 | 1.045927441 |
| <i>Cyp2b13</i>       | 0.000126494 | 2.358318664  | 3.360391743 | 1.002073079 |
| <i>Cyp2b13</i>       | 6.78E-05    | 2.768914105  | 3.804821824 | 1.035907719 |
| <i>Cyp2b13</i>       | 7.82E-05    | 2.444215279  | 3.684116548 | 1.23990127  |
| <i>Cyp2b19</i>       | 2.71E-06    | 3.134569513  | 8.809000483 | 5.67443097  |
| <i>Cyp2b9</i>        | 0.010357212 | 1.269310608  | 3.742996487 | 2.473685879 |
| <i>Cyp2c37</i>       | 0.000151746 | -1.322263286 | 3.386975943 | 4.709239229 |
| <i>Cyp2j12</i>       | 0.007983216 | -1.721516188 | 2.044141208 | 3.765657396 |
| <i>Cyp2j13</i>       | 0.047732502 | 1.879102557  | 4.244138697 | 2.36503614  |
| <i>Cyp4a12a</i>      | 0.000756645 | 5.729634285  | 7.243294546 | 1.513660261 |
| <i>Cyr61</i>         | 5.55E-06    | 1.558756203  | 6.970776708 | 5.412020505 |
| <i>Cysltr1</i>       | 0.000200662 | 1.055770494  | 5.765616214 | 4.70984572  |
| <i>Cyth4</i>         | 2.26E-05    | 1.414201634  | 7.223487688 | 5.809286053 |
| <i>Cyth4</i>         | 1.55E-06    | 1.220097366  | 7.055368244 | 5.835270877 |
| <i>Cytip</i>         | 2.16E-05    | 1.060638558  | 6.470016518 | 5.40937796  |
| <i>D330045A20Rik</i> | 0.023410671 | -1.196703665 | 3.185091932 | 4.381795596 |
| <i>D330045A20Rik</i> | 0.026002321 | -1.185653911 | 3.300358103 | 4.486012014 |
| <i>D730048I06Rik</i> | 0.000151539 | 3.191597295  | 8.211207945 | 5.01961065  |
| <i>Dbil5</i>         | 3.02E-05    | -2.819821053 | 1.663753219 | 4.483574272 |
| <i>Dbnnd2</i>        | 0.007686892 | -1.026269451 | 2.541093611 | 3.567363062 |
| <i>Dbnl</i>          | 1.23E-05    | 1.093035805  | 10.69775004 | 9.604714231 |
| <i>Dbp</i>           | 0.000715208 | -1.375143377 | 4.601115624 | 5.976259001 |
| <i>Dcaf12l1</i>      | 6.82E-05    | -1.068871612 | 5.164934212 | 6.233805825 |
| <i>Dcaf12l1</i>      | 0.000315151 | -1.00295798  | 5.153727982 | 6.156685962 |
| <i>Dcp2</i>          | 0.001496968 | 1.24829667   | 11.29509151 | 10.04679484 |
| <i>Dcstamp</i>       | 0.005258598 | 1.254870617  | 4.556620026 | 3.301749409 |
| <i>Dcun1d4</i>       | 0.047675479 | -1.288497211 | 2.301924592 | 3.590421803 |
| <i>Ddit3</i>         | 0.016462057 | 1.03992782   | 10.39559443 | 9.355666608 |
| <i>Ddit3</i>         | 0.012024206 | 1.274873542  | 10.63857098 | 9.363697442 |
| <i>Ddit3</i>         | 0.012591885 | 1.019887472  | 10.34561908 | 9.325731604 |
| <i>Ddit3</i>         | 0.017676549 | 1.081777829  | 10.38783885 | 9.306061018 |
| <i>Ddn</i>           | 0.000110166 | -1.379766015 | 5.141540091 | 6.521306105 |
| <i>Ddx58</i>         | 1.81E-06    | 1.348984379  | 7.552226118 | 6.203241739 |
| <i>Ddx60</i>         | 5.58E-05    | 2.611058225  | 4.324813059 | 1.713754835 |
| <i>Ddx60</i>         | 0.000705042 | 2.283874687  | 5.223101579 | 2.939226892 |
| <i>Ddx60</i>         | 8.67E-05    | 2.700375974  | 4.876011443 | 2.175635469 |
| <i>Ddx60</i>         | 0.000140437 | 2.080627298  | 4.825996928 | 2.74536963  |
| <i>Ddx60</i>         | 6.76E-05    | 2.026458317  | 5.071383563 | 3.044925246 |
| <i>Ddx60</i>         | 2.01E-05    | 2.971313252  | 4.636848006 | 1.665534755 |

|                |             |              |             |             |
|----------------|-------------|--------------|-------------|-------------|
| <i>Ddx60</i>   | 0.001083106 | 1.529074326  | 5.198766466 | 3.66969214  |
| <i>Ddx60</i>   | 0.008187954 | 1.024076099  | 3.61827703  | 2.594200931 |
| <i>Defa28</i>  | 0.002582262 | -1.076691711 | 6.180822525 | 7.257514236 |
| <i>Defb1</i>   | 3.14E-05    | 2.104829382  | 11.60457518 | 9.499745801 |
| <i>Defb42</i>  | 0.009297695 | 4.149264583  | 7.014131844 | 2.864867261 |
| <i>Defb50</i>  | 5.48E-05    | 2.779612736  | 12.81941863 | 10.0398059  |
| <i>Dennd2a</i> | 0.002161353 | 1.061000972  | 4.517462595 | 3.456461623 |
| <i>Dennd2d</i> | 0.001324788 | 1.344656489  | 6.249511198 | 4.904854708 |
| <i>Dennd2d</i> | 2.04E-05    | 1.789858997  | 6.481524728 | 4.691665731 |
| <i>Depdc7</i>  | 0.001098041 | 1.29019638   | 5.42681113  | 4.136614749 |
| <i>Dhrs3</i>   | 0.000968994 | 1.00581095   | 6.08077627  | 5.07496532  |
| <i>Dhrs7c</i>  | 4.68E-05    | 1.376014445  | 3.591814265 | 2.215799819 |
| <i>Dhx58</i>   | 0.000435759 | 1.855320824  | 6.089549222 | 4.234228397 |
| <i>Dixdc1</i>  | 1.39E-05    | -1.293440096 | 6.59017038  | 7.883610476 |
| <i>Dixdc1</i>  | 5.57E-05    | -1.293807152 | 6.578371985 | 7.872179137 |
| <i>Dixdc1</i>  | 3.55E-06    | -1.346562832 | 6.490937916 | 7.837500748 |
| <i>Dixdc1</i>  | 6.07E-05    | -1.286978741 | 6.606973706 | 7.893952447 |
| <i>Dixdc1</i>  | 5.09E-06    | -1.383277478 | 6.386065495 | 7.769342973 |
| <i>Dixdc1</i>  | 4.61E-05    | -1.428146613 | 6.390639611 | 7.818786224 |
| <i>Dixdc1</i>  | 2.70E-05    | -1.438187262 | 6.406023138 | 7.8442104   |
| <i>Dlg3</i>    | 0.00042685  | -1.527001638 | 4.305812798 | 5.832814436 |
| <i>Dlg3</i>    | 0.001550114 | -1.234372364 | 4.446113455 | 5.680485819 |
| <i>Dlg3</i>    | 6.38E-05    | -1.542900494 | 4.183532176 | 5.72643267  |
| <i>Dlgap3</i>  | 0.039196507 | -1.10772908  | 4.618654294 | 5.726383375 |
| <i>Dlk1</i>    | 0.000651631 | -1.076697857 | 5.500222701 | 6.576920558 |
| <i>Dmbt1</i>   | 0.000328708 | 2.503625145  | 3.656027096 | 1.152401951 |
| <i>Dnaaf3</i>  | 2.82E-05    | -1.542035979 | 5.275389711 | 6.81742569  |
| <i>Dnaaf3</i>  | 4.58E-05    | -1.629534976 | 5.068829058 | 6.698364034 |
| <i>Dnajb1</i>  | 0.015510332 | 1.365225431  | 5.838046438 | 4.472821006 |
| <i>Dnajb1</i>  | 0.000576454 | 1.419415064  | 5.990651362 | 4.571236297 |
| <i>Dnajc5b</i> | 0.010173778 | -1.75993779  | 1.877681905 | 3.637619695 |
| <i>Dnajc5b</i> | 0.005624327 | 1.391125997  | 3.884798413 | 2.493672416 |
| <i>Dnajc5g</i> | 0.042814481 | -1.311836675 | 2.365509023 | 3.677345698 |
| <i>Dock10</i>  | 0.000109436 | 1.741970191  | 5.837802697 | 4.095832505 |
| <i>Dock10</i>  | 7.14E-05    | 1.488796877  | 5.908366313 | 4.419569436 |
| <i>Dock10</i>  | 0.000124425 | 1.088775891  | 5.749019073 | 4.660243182 |
| <i>Dock10</i>  | 0.000399318 | 1.219040006  | 5.903195206 | 4.6841552   |
| <i>Dock10</i>  | 1.81E-05    | 1.273737496  | 5.766345765 | 4.492608269 |
| <i>Dock10</i>  | 0.001037833 | 1.331224863  | 5.776229131 | 4.445004268 |
| <i>Dock10</i>  | 8.46E-05    | 1.385455754  | 6.035538228 | 4.650082474 |
| <i>Dock10</i>  | 0.000202583 | 1.48038311   | 5.818530889 | 4.338147779 |
| <i>Dock10</i>  | 0.000283775 | 1.135944258  | 5.700514404 | 4.564570146 |
| <i>Dock10</i>  | 0.000104963 | 1.279966244  | 5.737028313 | 4.457062068 |
| <i>Dock10</i>  | 0.000140869 | 1.393674276  | 5.798240606 | 4.40456633  |
| <i>Dock10</i>  | 0.000176058 | 1.300918426  | 5.795057212 | 4.494138786 |
| <i>Dock10</i>  | 5.07E-05    | 1.3277358    | 5.814920051 | 4.487184251 |

|                |             |              |             |             |
|----------------|-------------|--------------|-------------|-------------|
| <i>Dock10</i>  | 1.52E-05    | 1.23541275   | 5.827878711 | 4.592465961 |
| <i>Dock10</i>  | 1.04E-05    | 1.520921597  | 5.858148272 | 4.337226675 |
| <i>Dock10</i>  | 2.44E-05    | 1.415312375  | 5.855436819 | 4.440124445 |
| <i>Dock10</i>  | 7.48E-05    | 1.518377575  | 6.134821973 | 4.616444398 |
| <i>Dock10</i>  | 2.74E-05    | 1.398919736  | 6.023533154 | 4.624613418 |
| <i>Dock2</i>   | 0.000120826 | 2.313102076  | 5.864804906 | 3.55170283  |
| <i>Dock2</i>   | 5.29E-05    | 1.947073738  | 5.756806826 | 3.809733088 |
| <i>Dock2</i>   | 5.92E-05    | 2.129340085  | 5.958626057 | 3.829285973 |
| <i>Dock4</i>   | 1.34E-05    | 1.12459862   | 9.609703896 | 8.485105276 |
| <i>Dock4</i>   | 9.97E-05    | 1.476938584  | 9.243807762 | 7.766869178 |
| <i>Dock4</i>   | 2.73E-05    | 1.214472481  | 9.790003412 | 8.57553093  |
| <i>Dpep2</i>   | 0.01531864  | 1.005627037  | 4.625528812 | 3.619901775 |
| <i>Dpep2</i>   | 0.00806565  | 1.083709161  | 4.344584267 | 3.260875106 |
| <i>Dtna</i>    | 2.65E-07    | -1.495513644 | 1.813396568 | 3.308910212 |
| <i>Dtna</i>    | 0.009561697 | -1.059187383 | 3.886984023 | 4.946171405 |
| <i>Dtx4</i>    | 0.002670655 | 2.036044551  | 3.722370138 | 1.686325587 |
| <i>Dyx1c1</i>  | 0.004018861 | -1.827265594 | 1.794061825 | 3.621327419 |
| <i>E2f8</i>    | 0.001205451 | 2.191338652  | 3.554198886 | 1.362860233 |
| <i>E2f8</i>    | 0.00067496  | 2.214005568  | 3.596643458 | 1.382637889 |
| <i>Eaf2</i>    | 0.000118263 | -1.405591326 | 4.106352536 | 5.511943862 |
| <i>Ear2</i>    | 0.000399763 | 2.106739358  | 5.316327525 | 3.209588168 |
| <i>Ect2</i>    | 0.000210032 | 1.242580086  | 4.564055752 | 3.321475666 |
| <i>Ect2</i>    | 0.012551396 | 1.153316957  | 4.439413738 | 3.286096782 |
| <i>Ect2</i>    | 0.004896986 | 1.175352976  | 4.639739349 | 3.464386372 |
| <i>Ect2</i>    | 1.10E-05    | 1.855840179  | 4.845404912 | 2.989564732 |
| <i>Ect2</i>    | 0.000102088 | 2.357687827  | 4.699090068 | 2.341402241 |
| <i>Edn1</i>    | 1.57E-06    | 1.665674136  | 5.298211883 | 3.632537747 |
| <i>Efcab6</i>  | 0.009115602 | 1.245184866  | 6.4331018   | 5.187916933 |
| <i>Efcab6</i>  | 0.014299088 | 1.166143924  | 6.412710782 | 5.246566858 |
| <i>Egr2</i>    | 0.002142208 | 1.477999277  | 6.084885399 | 4.606886122 |
| <i>Eif5a</i>   | 6.27E-05    | -1.221639463 | 6.546998198 | 7.76863766  |
| <i>Eif5a</i>   | 1.15E-05    | -1.225393677 | 6.64712608  | 7.872519757 |
| <i>Elf4</i>    | 4.60E-05    | 1.517104818  | 6.730142518 | 5.2130377   |
| <i>Elf4</i>    | 1.73E-05    | 1.549451381  | 6.640407273 | 5.090955892 |
| <i>Elf4</i>    | 0.000176403 | 1.245545082  | 6.517694741 | 5.272149659 |
| <i>Elfn2</i>   | 0.004357998 | -1.109942751 | 3.645984566 | 4.755927317 |
| <i>Emilin1</i> | 0.00093735  | 1.133566244  | 5.432227181 | 4.298660937 |
| <i>Eml2</i>    | 0.001490487 | -1.066615159 | 5.429181731 | 6.495796891 |
| <i>Eml2</i>    | 0.000402865 | -1.012564784 | 5.450168196 | 6.462732981 |
| <i>Eml2</i>    | 0.001038773 | -1.049681333 | 5.523877016 | 6.573558349 |
| <i>Eml2</i>    | 0.000101558 | -1.053821434 | 5.354202172 | 6.408023607 |
| <i>Emp2</i>    | 1.34E-06    | 1.322091145  | 7.586947835 | 6.26485669  |
| <i>Enc1</i>    | 1.27E-06    | 1.19318156   | 6.864054488 | 5.670872928 |
| <i>Enpp3</i>   | 0.025926589 | 1.043257566  | 4.991337124 | 3.948079558 |
| <i>Entpd8</i>  | 0.005138705 | -1.474751546 | 3.506482491 | 4.981234037 |
| <i>Entpd8</i>  | 0.000252657 | 1.438256877  | 5.359999164 | 3.921742287 |

|                |             |              |             |             |
|----------------|-------------|--------------|-------------|-------------|
| <i>Entpd8</i>  | 0.030341199 | -1.198126618 | 3.598429184 | 4.796555803 |
| <i>Entpd8</i>  | 0.036275198 | -1.287656196 | 3.599705687 | 4.887361882 |
| <i>Epb41I3</i> | 0.001267393 | -1.212272283 | 4.31170157  | 5.523973853 |
| <i>Epb41I3</i> | 2.08E-05    | -1.406180365 | 4.277907185 | 5.68408755  |
| <i>Epb41I3</i> | 1.28E-05    | -1.052730941 | 4.662546386 | 5.715277327 |
| <i>Epb41I3</i> | 0.000309568 | -1.042245393 | 4.468873965 | 5.511119358 |
| <i>Epb41I3</i> | 7.98E-05    | -1.058479104 | 4.445996473 | 5.504475577 |
| <i>Epb41I3</i> | 0.001684994 | -1.154216372 | 4.370781259 | 5.524997631 |
| <i>Epb41I3</i> | 0.000467198 | -1.251217862 | 4.249886265 | 5.501104127 |
| <i>Epb41I3</i> | 0.000497197 | -1.475243616 | 4.199455289 | 5.674698906 |
| <i>Epb41I3</i> | 0.003371133 | -1.294311356 | 4.25043831  | 5.544749666 |
| <i>Epb41I3</i> | 0.000257135 | -1.022590505 | 4.594563446 | 5.617153951 |
| <i>Epb41I3</i> | 0.000837676 | -1.064262342 | 4.508937804 | 5.573200146 |
| <i>Epb41I3</i> | 0.001143683 | -1.169200403 | 4.410981366 | 5.580181769 |
| <i>Epb41I3</i> | 0.000196463 | -1.063095628 | 4.576359987 | 5.639455615 |
| <i>Epb41I3</i> | 0.003473671 | -1.244335301 | 4.29924354  | 5.54357884  |
| <i>Epb41I3</i> | 0.00015308  | -1.023285078 | 4.672471813 | 5.695756891 |
| <i>Epb41I3</i> | 0.004328129 | -1.268981372 | 4.468400861 | 5.737382233 |
| <i>Epb41I3</i> | 0.004277679 | -1.145836192 | 4.621659472 | 5.767495664 |
| <i>Epb41I3</i> | 6.98E-05    | -1.119185659 | 4.477761851 | 5.596947509 |
| <i>Epb41I3</i> | 0.000533249 | -1.083252802 | 4.391421681 | 5.474674483 |
| <i>Epb41I3</i> | 6.63E-05    | -1.10291837  | 4.449974048 | 5.552892419 |
| <i>Epb41I3</i> | 4.44E-05    | -1.070056349 | 4.560274674 | 5.630331023 |
| <i>Epb41I3</i> | 0.000552076 | -1.117886103 | 4.408613216 | 5.526499319 |
| <i>Epb41I3</i> | 0.00142299  | -1.177573858 | 4.392509523 | 5.570083381 |
| <i>Epb41I3</i> | 0.002689922 | -1.142370456 | 4.530543761 | 5.672914216 |
| <i>Epb41I3</i> | 0.001858384 | -1.076955805 | 4.350305407 | 5.427261213 |
| <i>Epb41I5</i> | 0.004122478 | 1.198416993  | 6.729113782 | 5.530696789 |
| <i>Epb41I5</i> | 0.005932186 | 1.112183429  | 6.694357488 | 5.582174059 |
| <i>Ephb3</i>   | 0.012650735 | 1.274324321  | 4.896806395 | 3.622482074 |
| <i>Epsti1</i>  | 0.002134981 | 1.317384345  | 3.793154179 | 2.475769835 |
| <i>Erbb4</i>   | 0.01599629  | -1.272387113 | 3.821449534 | 5.093836647 |
| <i>Ercc1</i>   | 0.019076355 | 1.033108739  | 3.744494112 | 2.711385373 |
| <i>Ercc6l</i>  | 0.004292049 | 1.432761732  | 4.061562521 | 2.628800789 |
| <i>Erg</i>     | 0.014582584 | 1.228746271  | 3.557890623 | 2.329144352 |
| <i>Ermap</i>   | 0.001037134 | -1.163935775 | 4.701126717 | 5.865062493 |
| <i>Ermap</i>   | 0.000242361 | -1.178115851 | 4.730405467 | 5.908521317 |
| <i>Ermap</i>   | 0.010641664 | -1.114872325 | 4.55501644  | 5.669888765 |
| <i>Ern2</i>    | 0.004682083 | -1.021562734 | 3.536475249 | 4.558037984 |
| <i>Ern2</i>    | 0.007719201 | -1.134205981 | 2.767026035 | 3.901232015 |
| <i>Ern2</i>    | 0.017936957 | -1.555409221 | 2.282503747 | 3.837912969 |
| <i>Espl1</i>   | 0.007156603 | 1.009781867  | 4.309608218 | 3.299826351 |
| <i>Esr2</i>    | 0.003854616 | -1.147696292 | 3.403450887 | 4.551147179 |
| <i>Etv2</i>    | 0.004817239 | -1.086936233 | 4.405278901 | 5.492215134 |
| <i>Etv4</i>    | 0.001603348 | 1.010307974  | 6.908339832 | 5.898031858 |
| <i>Evc2</i>    | 2.74E-05    | -1.101815864 | 8.182271485 | 9.284087348 |



|                |             |              |             |             |
|----------------|-------------|--------------|-------------|-------------|
| <i>Evc2</i>    | 0.001088592 | -1.06053374  | 8.319687973 | 9.380221714 |
| <i>Exph5</i>   | 0.002185971 | -1.922458111 | 1.855281854 | 3.777739966 |
| <i>Eya2</i>    | 0.001678707 | 1.529417272  | 3.671444677 | 2.142027405 |
| <i>F8</i>      | 0.014125179 | -1.307955197 | 2.104271801 | 3.412226998 |
| <i>Fabp2</i>   | 0.001013927 | -1.962160975 | 1.455393154 | 3.417554129 |
| <i>Fabp9</i>   | 0.000103638 | -2.900451775 | 1.466378882 | 4.366830657 |
| <i>Fads6</i>   | 6.70E-05    | -1.744576303 | 1.729585639 | 3.474161943 |
| <i>Fam105a</i> | 0.00091751  | 1.101381407  | 5.749529771 | 4.648148365 |
| <i>Fam107a</i> | 0.040662043 | 1.122500222  | 4.191031961 | 3.068531739 |
| <i>Fam107b</i> | 0.000141452 | 1.142827386  | 5.286195613 | 4.143368227 |
| <i>Fam107b</i> | 0.000559575 | 1.058298088  | 5.366958223 | 4.308660134 |
| <i>Fam107b</i> | 6.34E-05    | 1.021287481  | 5.216109353 | 4.194821872 |
| <i>Fam167a</i> | 0.003885209 | 1.037151008  | 6.12815864  | 5.091007631 |
| <i>Fam167a</i> | 0.024132558 | 1.113887839  | 6.121035639 | 5.0071478   |
| <i>Fam184b</i> | 0.036621231 | -1.043842807 | 2.682570108 | 3.726412914 |
| <i>Fam219b</i> | 0.002627402 | 1.463407304  | 10.25195573 | 8.788548426 |
| <i>Fam222a</i> | 4.39E-05    | -1.053797254 | 6.855189082 | 7.908986336 |
| <i>Fam222a</i> | 2.59E-05    | -1.025885587 | 6.89157377  | 7.917459357 |
| <i>Fam229b</i> | 0.001270899 | -1.018559488 | 4.440673477 | 5.459232965 |
| <i>Fam229b</i> | 0.000157183 | -1.277509171 | 4.372410736 | 5.649919906 |
| <i>Fam46a</i>  | 0.000352614 | 1.107041535  | 7.117788685 | 6.01074715  |
| <i>Fam46a</i>  | 5.30E-05    | 1.070364418  | 7.123909075 | 6.053544657 |
| <i>Fam47e</i>  | 0.02466403  | -1.437147774 | 2.356283301 | 3.793431075 |
| <i>Fam65b</i>  | 0.032358027 | 1.050500373  | 3.709516901 | 2.659016528 |
| <i>Fam65b</i>  | 0.020249741 | 1.506938117  | 4.488076179 | 2.981138062 |
| <i>Fam65b</i>  | 0.011401549 | 1.248699538  | 4.286508277 | 3.037808738 |
| <i>Fam65b</i>  | 0.000496966 | 1.547394721  | 4.391690433 | 2.844295712 |
| <i>Fam65b</i>  | 0.036675989 | 1.0945798    | 3.347767555 | 2.253187756 |
| <i>Fam65b</i>  | 0.008420704 | 1.117527375  | 4.51682702  | 3.399299645 |
| <i>Fam65b</i>  | 0.002605653 | 1.063371861  | 4.38809169  | 3.324719829 |
| <i>Fam69c</i>  | 0.001856075 | -1.938482737 | 1.560059349 | 3.498542086 |
| <i>Fam69c</i>  | 0.007039868 | -1.899367481 | 1.739551836 | 3.638919316 |
| <i>Fanca</i>   | 0.012492214 | 1.964767199  | 3.780656467 | 1.815889268 |
| <i>Fanca</i>   | 0.015309428 | 1.649714941  | 4.18156246  | 2.531847519 |
| <i>Fanca</i>   | 0.04595139  | 1.220931867  | 4.069208658 | 2.848276791 |
| <i>Fanca</i>   | 0.004643004 | 1.415240202  | 4.166073424 | 2.750833222 |
| <i>Fanca</i>   | 0.010699537 | 1.834224882  | 4.077923703 | 2.243698821 |
| <i>Fbln1</i>   | 1.61E-05    | 1.14843309   | 7.835439993 | 6.687006903 |
| <i>Fbp1</i>    | 4.40E-05    | 1.717998579  | 7.277460424 | 5.559461845 |
| <i>Fbp1</i>    | 8.10E-05    | 1.530121071  | 7.08363391  | 5.553512839 |
| <i>Fbxl13</i>  | 0.005646517 | 1.061442065  | 5.082182203 | 4.020740139 |
| <i>Fbxl13</i>  | 0.000564138 | 1.057911137  | 4.955792667 | 3.897881531 |
| <i>Fbxl4</i>   | 0.000755194 | -1.18178235  | 4.785389857 | 5.967172207 |
| <i>Fbxl4</i>   | 1.08E-05    | -1.355943763 | 4.624392612 | 5.980336375 |
| <i>Fbxo16</i>  | 0.001656659 | -1.113263499 | 3.419151704 | 4.532415203 |
| <i>Fbxo40</i>  | 9.91E-05    | -1.64729613  | 3.012731832 | 4.660027963 |

|               |             |              |             |             |
|---------------|-------------|--------------|-------------|-------------|
| <i>Fcamr</i>  | 8.31E-05    | 2.002319349  | 4.906050695 | 2.903731346 |
| <i>Fcamr</i>  | 0.000260012 | 2.403862297  | 4.857834545 | 2.453972248 |
| <i>Fcamr</i>  | 0.001083935 | 2.529468629  | 4.631380796 | 2.101912167 |
| <i>Fcamr</i>  | 0.00040688  | 2.210987559  | 3.531343798 | 1.320356239 |
| <i>Fcamr</i>  | 0.000316621 | 2.301200096  | 4.689251902 | 2.388051806 |
| <i>Fcer1g</i> | 0.010868687 | 1.083318965  | 3.598340817 | 2.515021851 |
| <i>Fcgr1</i>  | 0.038405728 | 1.243501113  | 3.971856862 | 2.728355749 |
| <i>Fcgr2b</i> | 1.43E-06    | 1.726193929  | 7.102346408 | 5.376152479 |
| <i>Fcgr2b</i> | 1.12E-05    | 1.577907433  | 7.10860283  | 5.530695397 |
| <i>Fcgr4</i>  | 7.69E-07    | 2.48816454   | 3.896457667 | 1.408293127 |
| <i>Fcrla</i>  | 0.042848288 | 1.101678276  | 3.921891349 | 2.820213073 |
| <i>Fcr1s</i>  | 0.00044878  | 1.698501793  | 4.911200141 | 3.212698348 |
| <i>Fcr1s</i>  | 0.002414158 | 1.983062002  | 5.172842151 | 3.18978015  |
| <i>Fermt1</i> | 0.014802518 | 1.122963774  | 4.26126157  | 3.138297796 |
| <i>Fermt1</i> | 0.010271649 | 1.13115317   | 4.597073014 | 3.465919844 |
| <i>Fermt1</i> | 0.006612072 | 1.299311398  | 4.447985255 | 3.148673857 |
| <i>Fermt1</i> | 0.003112192 | 1.476751777  | 4.557597095 | 3.080845317 |
| <i>Fermt3</i> | 0.000437898 | 1.792997509  | 4.254629938 | 2.461632429 |
| <i>Ffar2</i>  | 4.15E-06    | 1.048579905  | 11.11011201 | 10.06153211 |
| <i>Ffar2</i>  | 4.67E-05    | 1.644385308  | 10.57606802 | 8.931682717 |
| <i>Fga</i>    | 0.022221105 | -1.089512769 | 2.758292169 | 3.847804939 |
| <i>Fga</i>    | 0.002743073 | -1.065741373 | 3.079465168 | 4.14520654  |
| <i>Fgd2</i>   | 1.55E-07    | 1.55256875   | 7.109780716 | 5.557211966 |
| <i>Fgd2</i>   | 0.044338585 | 1.150005578  | 7.065433194 | 5.915427616 |
| <i>Fgd3</i>   | 1.13E-05    | 1.608250458  | 4.835337932 | 3.227087474 |
| <i>Fgd3</i>   | 0.002224345 | 1.671763019  | 4.912021523 | 3.240258503 |
| <i>Fgd3</i>   | 0.003261105 | 1.169216192  | 4.616876447 | 3.447660256 |
| <i>Fgf17</i>  | 2.07E-05    | 1.202696597  | 8.758518758 | 7.555822161 |
| <i>Fgfbp1</i> | 0.00405182  | 2.759175651  | 5.821411911 | 3.06223626  |
| <i>Fgfbp1</i> | 0.00157229  | 3.451293544  | 5.888130872 | 2.436837328 |
| <i>Fgfbp1</i> | 0.001437602 | 3.48042572   | 6.075549755 | 2.595124035 |
| <i>Fgfbp1</i> | 0.00186301  | 2.867581127  | 5.881947478 | 3.014366351 |
| <i>Fgfr3</i>  | 0.001343127 | 1.07614293   | 4.950900864 | 3.874757934 |
| <i>Fgfr3</i>  | 0.005885708 | 1.137416946  | 4.564455035 | 3.427038089 |
| <i>Fgfr3</i>  | 0.004782914 | 1.049181057  | 4.650472367 | 3.60129131  |
| <i>Fgfr3</i>  | 0.000146982 | 1.186932168  | 4.853959314 | 3.667027147 |
| <i>Fgfr3</i>  | 0.012006933 | 1.200951593  | 4.779183296 | 3.578231703 |
| <i>Fgfr3</i>  | 0.000722151 | 1.251780856  | 4.908640505 | 3.656859649 |
| <i>Fgfr3</i>  | 0.001220588 | 1.002306322  | 4.602542004 | 3.600235682 |
| <i>Fgfr3</i>  | 4.06E-05    | 1.003470398  | 4.572698062 | 3.569227664 |
| <i>Fgfr3</i>  | 0.009038076 | 1.054742833  | 4.628121458 | 3.573378625 |
| <i>Fgfr3</i>  | 8.61E-05    | 1.195512288  | 4.75501961  | 3.559507322 |
| <i>Fgfr3</i>  | 0.012495323 | 1.017014052  | 4.475854666 | 3.458840614 |
| <i>Fgfr3</i>  | 0.000334342 | 1.3667376    | 4.942211324 | 3.575473724 |
| <i>Fgfr3</i>  | 0.001078597 | 1.15506877   | 4.751874971 | 3.596806201 |
| <i>Fggy</i>   | 1.57E-05    | -1.624808157 | 2.02543045  | 3.650238607 |

|              |             |              |             |             |
|--------------|-------------|--------------|-------------|-------------|
| <i>Fgr</i>   | 7.16E-08    | 2.107059769  | 3.594031449 | 1.48697168  |
| <i>Fhl2</i>  | 0.000158548 | 1.147022488  | 7.920345858 | 6.77332337  |
| <i>Fhl2</i>  | 0.000167003 | 1.193545299  | 7.834096395 | 6.640551096 |
| <i>Fhl2</i>  | 4.77E-05    | 1.353619375  | 7.940306749 | 6.586687374 |
| <i>Fmnl1</i> | 0.005503011 | 1.399806947  | 5.081032163 | 3.681225215 |
| <i>Fmnl1</i> | 1.31E-05    | 1.437005243  | 5.057930464 | 3.620925221 |
| <i>Fmnl1</i> | 1.85E-05    | 1.375598446  | 4.905255954 | 3.529657508 |
| <i>Fmnl1</i> | 0.002447078 | 1.090559051  | 5.225129736 | 4.134570684 |
| <i>Fmnl1</i> | 0.004968871 | 1.612259009  | 5.023220123 | 3.410961114 |
| <i>Fmnl1</i> | 0.003748875 | 1.218073776  | 5.030354505 | 3.812280729 |
| <i>Fmnl1</i> | 0.000450463 | 1.340004719  | 5.005795649 | 3.665790929 |
| <i>Fmnl1</i> | 0.001246888 | 1.34664281   | 4.952746618 | 3.606103808 |
| <i>Fmnl1</i> | 2.04E-05    | 1.871052129  | 5.189055014 | 3.318002886 |
| <i>Fmnl1</i> | 2.12E-05    | 1.594025046  | 5.274387721 | 3.680362675 |
| <i>Fn1</i>   | 0.001471957 | 1.408873403  | 10.55835143 | 9.149478031 |
| <i>Fn1</i>   | 0.000764317 | 1.426531939  | 10.49704362 | 9.070511683 |
| <i>Fn1</i>   | 0.002066452 | 1.344064477  | 10.44770077 | 9.103636296 |
| <i>Fn1</i>   | 0.000535075 | 1.432536484  | 10.61445643 | 9.181919949 |
| <i>Fn1</i>   | 0.000796613 | 1.445541715  | 10.5327142  | 9.087172488 |
| <i>Fn1</i>   | 0.001053311 | 1.464904805  | 10.61536447 | 9.150459663 |
| <i>Fn1</i>   | 0.001738714 | 1.340049463  | 10.53839741 | 9.198347942 |
| <i>Fn1</i>   | 0.00261874  | 1.283660104  | 10.45339945 | 9.169739344 |
| <i>Fn1</i>   | 0.001915813 | 1.395702303  | 10.53096338 | 9.13526108  |
| <i>Fn1</i>   | 0.000936868 | 1.387391336  | 10.5198923  | 9.132500959 |
| <i>Fn1</i>   | 0.00181764  | 1.272721426  | 10.41232577 | 9.139604341 |
| <i>Fn1</i>   | 0.001603677 | 1.416019524  | 10.56347493 | 9.147455408 |
| <i>Fn1</i>   | 0.002101499 | 1.374182298  | 10.49438036 | 9.120198063 |
| <i>Fos</i>   | 4.98E-05    | 1.572065887  | 7.082841095 | 5.510775208 |
| <i>Fosl2</i> | 1.95E-05    | 1.417222476  | 7.492393991 | 6.075171516 |
| <i>Foxp2</i> | 0.000171697 | -1.24466165  | 5.875969452 | 7.120631102 |
| <i>Foxp2</i> | 5.42E-05    | -1.16149942  | 5.894748671 | 7.05624809  |
| <i>Foxp2</i> | 6.82E-05    | -1.279333105 | 5.70657775  | 6.985910854 |
| <i>Fpr1</i>  | 0.024424181 | 1.012073685  | 5.015685802 | 4.003612116 |
| <i>Fpr2</i>  | 0.001084958 | 2.300696258  | 4.600200281 | 2.299504023 |
| <i>Frem1</i> | 0.000918032 | 1.227984407  | 3.897860148 | 2.669875741 |
| <i>Frem1</i> | 0.020275286 | 1.159641362  | 3.71570364  | 2.556062278 |
| <i>Frem1</i> | 0.000817939 | 1.169664614  | 3.920868163 | 2.751203549 |
| <i>Frzb</i>  | 0.013537054 | 1.109223128  | 4.947689358 | 3.83846623  |
| <i>Fscn1</i> | 0.000678442 | 1.035246299  | 6.545711232 | 5.510464933 |
| <i>Fxyd3</i> | 3.74E-05    | 2.165532805  | 10.04063128 | 7.875098475 |
| <i>Fxyd4</i> | 0.001244471 | 2.518588489  | 7.942179769 | 5.42359128  |
| <i>Fxyd4</i> | 0.00288728  | 2.310721807  | 7.913046688 | 5.602324881 |
| <i>Fxyd4</i> | 0.000821536 | 2.742221165  | 7.956359754 | 5.214138589 |
| <i>Fxyd4</i> | 0.000847633 | 2.649426214  | 7.996532988 | 5.347106774 |
| <i>Fxyd4</i> | 0.000984499 | 2.575017155  | 7.936303829 | 5.361286674 |
| <i>Fxyd4</i> | 0.001288363 | 2.541302828  | 7.978329734 | 5.437026906 |

|                |             |              |             |             |
|----------------|-------------|--------------|-------------|-------------|
| <i>Fyb</i>     | 2.91E-05    | 1.901929473  | 6.470222161 | 4.568292688 |
| <i>Fyb</i>     | 0.004072606 | 1.16554424   | 4.840785579 | 3.675241339 |
| <i>Fyb</i>     | 0.00206699  | 1.088273791  | 4.919684329 | 3.831410537 |
| <i>Fyb</i>     | 5.75E-06    | 1.63495212   | 6.201644089 | 4.566691969 |
| <i>Fyb</i>     | 0.008418909 | 1.173586304  | 4.89127466  | 3.717688356 |
| <i>G6b</i>     | 0.001691133 | -1.181324385 | 3.411434038 | 4.592758422 |
| <i>G6b</i>     | 0.002586541 | -1.16229677  | 3.877338396 | 5.039635166 |
| <i>G6b</i>     | 0.023867678 | -1.975535853 | 2.880337634 | 4.855873487 |
| <i>G6b</i>     | 0.005734049 | -1.115070466 | 3.595432829 | 4.710503295 |
| <i>G6b</i>     | 0.00577348  | -1.342508578 | 3.641226653 | 4.983735231 |
| <i>G6b</i>     | 0.001586929 | -1.152498683 | 3.67531346  | 4.827812143 |
| <i>Gabrp</i>   | 0.000789619 | 4.619252215  | 6.919346649 | 2.300094435 |
| <i>Gabrp</i>   | 0.000155645 | 3.83575372   | 6.582862071 | 2.747108352 |
| <i>Gal3st4</i> | 0.00570718  | 1.02871248   | 3.674440062 | 2.645727582 |
| <i>Galnt12</i> | 0.041923676 | 1.028314113  | 3.684387642 | 2.656073529 |
| <i>Gapdh</i>   | 0.000565075 | -1.178261747 | 4.44289307  | 5.621154817 |
| <i>Garnl3</i>  | 0.002053495 | 1.307120412  | 3.846804649 | 2.539684237 |
| <i>Gbp3</i>    | 0.001293763 | 1.399305343  | 5.38545337  | 3.986148027 |
| <i>Gbp3</i>    | 0.000160291 | 1.558242256  | 5.405938045 | 3.847695788 |
| <i>Gbp3</i>    | 0.000821137 | 1.106351933  | 5.322669492 | 4.216317559 |
| <i>Gbp3</i>    | 0.002246197 | 1.202701024  | 5.153481316 | 3.950780292 |
| <i>Gbp3</i>    | 6.32E-05    | 1.408228195  | 5.549955827 | 4.141727633 |
| <i>Gbp3</i>    | 1.04E-05    | 1.267274403  | 5.42258999  | 4.155315587 |
| <i>Gbp3</i>    | 0.002031137 | 1.159224905  | 5.3643115   | 4.205086596 |
| <i>Gbp4</i>    | 0.000695295 | 1.111207018  | 6.321723534 | 5.210516516 |
| <i>Gbp4</i>    | 3.74E-06    | 1.177194972  | 6.234929612 | 5.05773464  |
| <i>Gbp4</i>    | 8.46E-05    | 1.113377692  | 6.065174906 | 4.951797214 |
| <i>Gcgr</i>    | 7.17E-07    | 1.282266522  | 8.196595876 | 6.914329354 |
| <i>Gcnt3</i>   | 0.040888144 | -1.124613944 | 2.627598401 | 3.752212345 |
| <i>Gcnt4</i>   | 0.006716669 | 1.290663008  | 4.707551891 | 3.416888882 |
| <i>Gcnt4</i>   | 0.001766496 | 1.421015937  | 5.025286388 | 3.60427045  |
| <i>Gcnt4</i>   | 0.006841913 | 1.327289374  | 4.94922656  | 3.621937186 |
| <i>Gcnt4</i>   | 8.57E-06    | 1.667530497  | 4.836420188 | 3.168889692 |
| <i>Gcnt4</i>   | 0.005705232 | 1.296875287  | 4.790001366 | 3.493126079 |
| <i>Gcnt4</i>   | 0.005293769 | 1.281423801  | 4.92265684  | 3.641233039 |
| <i>Gcnt4</i>   | 0.001546317 | 1.38221269   | 4.712548635 | 3.330335945 |
| <i>Gdpd2</i>   | 0.00050434  | 1.005442352  | 5.890215374 | 4.884773022 |
| <i>Gdpd2</i>   | 2.04E-05    | 1.224905973  | 5.779146369 | 4.554240396 |
| <i>Gfpt2</i>   | 0.000112011 | 1.177409077  | 6.24959206  | 5.072182983 |
| <i>Ggact</i>   | 7.45E-05    | -1.023966029 | 5.280819276 | 6.304785305 |
| <i>Ggt5</i>    | 0.010328702 | 1.201613708  | 3.831502294 | 2.629888586 |
| <i>Ghrl</i>    | 0.000925227 | -1.153891843 | 8.6081675   | 9.762059343 |
| <i>Ghsr</i>    | 0.003657665 | 1.453164829  | 4.088327057 | 2.635162228 |
| <i>Gipc2</i>   | 0.000187659 | 1.855315509  | 6.362222652 | 4.506907143 |
| <i>Gipc2</i>   | 0.000146271 | 1.546037402  | 6.239752612 | 4.69371521  |
| <i>Gjb4</i>    | 0.000419047 | 1.975141703  | 4.516137624 | 2.54099592  |

|                |             |              |             |             |
|----------------|-------------|--------------|-------------|-------------|
| <i>Gjb4</i>    | 0.002153774 | 1.617642697  | 4.670144375 | 3.052501678 |
| <i>Gjb4</i>    | 0.000250952 | 1.660938477  | 4.690516812 | 3.029578335 |
| <i>Gjb6</i>    | 0.008409815 | -1.094701105 | 6.117304049 | 7.212005154 |
| <i>Glis1</i>   | 6.79E-06    | -1.189384203 | 5.94315356  | 7.132537763 |
| <i>Glis3</i>   | 0.013165669 | 1.522385792  | 7.275430092 | 5.7530443   |
| <i>Glis3</i>   | 0.014739575 | 1.575398467  | 7.128955528 | 5.553557061 |
| <i>Glis3</i>   | 0.018968733 | 1.545813597  | 7.268369917 | 5.72255632  |
| <i>Glis3</i>   | 0.014807054 | 1.562948531  | 7.407632239 | 5.844683707 |
| <i>Gls2</i>    | 0.000101627 | 1.016816943  | 5.763425848 | 4.746608906 |
| <i>Glycam1</i> | 0.001151188 | 1.022870177  | 5.295159581 | 4.272289404 |
| <i>Gm10037</i> | 0.022322897 | 1.052055586  | 3.784254504 | 2.732198917 |
| <i>Gm10037</i> | 0.042514673 | 1.372233093  | 3.819855125 | 2.447622032 |
| <i>Gm10037</i> | 0.003042695 | 1.664799744  | 4.050651285 | 2.385851541 |
| <i>Gm10130</i> | 0.004063863 | -1.264378641 | 2.636965763 | 3.901344404 |
| <i>Gm10130</i> | 0.00491287  | -1.912845539 | 2.427496633 | 4.340342173 |
| <i>Gm11568</i> | 0.010288802 | -1.172686147 | 4.049121443 | 5.22180759  |
| <i>Gm11568</i> | 0.000183784 | -1.016311228 | 4.284317928 | 5.300629157 |
| <i>Gm12881</i> | 0.000458914 | -1.052369449 | 9.872075162 | 10.92444461 |
| <i>Gm13178</i> | 0.016825811 | -1.653938947 | 2.215611848 | 3.869550796 |
| <i>Gm13247</i> | 0.000796323 | -1.137031357 | 5.166037796 | 6.303069153 |
| <i>Gm14517</i> | 0.001882699 | -1.08106903  | 7.407188287 | 8.488257316 |
| <i>Gm14517</i> | 0.000870176 | -1.119038118 | 7.387487793 | 8.50652591  |
| <i>Gm15266</i> | 0.000353917 | -1.251585944 | 7.359860009 | 8.611445952 |
| <i>Gm156</i>   | 1.45E-05    | -1.201216157 | 4.578388803 | 5.77960496  |
| <i>Gm16867</i> | 0.006320686 | -2.044954861 | 1.462220908 | 3.50717577  |
| <i>Gm17689</i> | 0.004947647 | 3.551615691  | 8.525095747 | 4.973480057 |
| <i>Gm1966</i>  | 0.005862987 | 1.845512199  | 3.490930999 | 1.6454188   |
| <i>Gm1966</i>  | 0.000426314 | 2.460473625  | 3.605465161 | 1.144991536 |
| <i>Gm21064</i> | 0.000307684 | 1.297793248  | 5.935124376 | 4.637331128 |
| <i>Gm21064</i> | 0.031712039 | -1.667423344 | 2.521908568 | 4.189331912 |
| <i>Gm21064</i> | 0.00136285  | -1.298593955 | 2.696853448 | 3.995447403 |
| <i>Gm21064</i> | 2.06E-05    | -1.038732033 | 4.750856742 | 5.789588774 |
| <i>Gm21064</i> | 0.014284434 | -2.152041255 | 1.945585281 | 4.097626536 |
| <i>Gm21064</i> | 0.010129027 | -1.58318222  | 2.124019034 | 3.707201255 |
| <i>Gm22496</i> | 0.001316173 | 1.064515306  | 6.455046164 | 5.390530858 |
| <i>Gm25380</i> | 9.21E-05    | -1.05030775  | 4.834750773 | 5.885058523 |
| <i>Gm29692</i> | 0.000146065 | -1.561373087 | 8.101076866 | 9.662449953 |
| <i>Gm29958</i> | 0.001637922 | -2.34336982  | 2.444457472 | 4.787827291 |
| <i>Gm29986</i> | 5.43E-06    | 1.78687134   | 10.74551208 | 8.958640739 |
| <i>Gm32886</i> | 9.72E-05    | -2.782871841 | 6.161691984 | 8.944563825 |
| <i>Gm35257</i> | 2.70E-08    | -1.126230216 | 7.755517261 | 8.881747478 |
| <i>Gm35315</i> | 0.013874239 | -1.005741752 | 3.201742925 | 4.207484677 |
| <i>Gm35549</i> | 1.42E-05    | -1.380171704 | 5.120430649 | 6.500602353 |
| <i>Gm36375</i> | 0.000699946 | 1.550362269  | 7.305830093 | 5.755467823 |
| <i>Gm40055</i> | 0.015585064 | 1.890527217  | 3.295613185 | 1.405085968 |
| <i>Gm40318</i> | 0.008081673 | 1.060961273  | 3.190614125 | 2.129652852 |

|               |             |              |             |             |
|---------------|-------------|--------------|-------------|-------------|
| <i>Gm4763</i> | 0.000930986 | 1.945464998  | 4.699741692 | 2.754276694 |
| <i>Gm4763</i> | 0.005268367 | 2.196086095  | 4.957917313 | 2.761831218 |
| <i>Gm4788</i> | 3.65E-05    | 1.015726283  | 8.352328866 | 7.336602583 |
| <i>Gm4881</i> | 0.001457315 | -1.139720722 | 2.916904747 | 4.05662547  |
| <i>Gm4951</i> | 0.001222342 | 1.1270439    | 4.088548527 | 2.961504627 |
| <i>Gm4951</i> | 0.01847826  | 1.324776014  | 4.137486067 | 2.812710053 |
| <i>Gm5174</i> | 0.037257386 | -1.195755171 | 2.149870821 | 3.345625992 |
| <i>Gm5431</i> | 0.000503302 | 1.433207266  | 4.515280006 | 3.08207274  |
| <i>Gm5431</i> | 8.29E-05    | 1.656087237  | 4.477603693 | 2.821516456 |
| <i>Gm5431</i> | 0.000134389 | 1.473580604  | 4.588717027 | 3.115136423 |
| <i>Gm5431</i> | 0.003694805 | 1.721476502  | 4.331075428 | 2.609598927 |
| <i>Gm5464</i> | 0.001092441 | -1.687542675 | 2.566674896 | 4.254217571 |
| <i>Gm6745</i> | 0.027467854 | 1.271469916  | 4.007886679 | 2.736416763 |
| <i>Gm6760</i> | 0.000148928 | -1.424319804 | 3.247863847 | 4.672183652 |
| <i>Gm6943</i> | 0.002736782 | -1.192204552 | 2.5033598   | 3.695564352 |
| <i>Gm6987</i> | 0.000737064 | -1.292860045 | 9.220316194 | 10.51317624 |
| <i>Gm7244</i> | 0.000271001 | -1.884406275 | 6.491093654 | 8.375499929 |
| <i>Gm826</i>  | 0.003357955 | 1.154341197  | 4.497189581 | 3.342848384 |
| <i>Gm9325</i> | 6.52E-05    | 1.010350384  | 7.792424373 | 6.782073989 |
| <i>Gm9513</i> | 2.92E-06    | -1.196533706 | 7.624105916 | 8.820639622 |
| <i>Gm9631</i> | 1.99E-05    | -1.12087412  | 4.791944517 | 5.912818636 |
| <i>Gnat2</i>  | 0.003343082 | -1.127689502 | 3.012983228 | 4.14067273  |
| <i>Gngt2</i>  | 2.69E-05    | 2.00528281   | 3.731351259 | 1.726068449 |
| <i>Gngt2</i>  | 0.005490334 | 1.152700814  | 5.813198828 | 4.660498015 |
| <i>Gngt2</i>  | 4.50E-05    | 1.115449055  | 5.663544262 | 4.548095207 |
| <i>Gpm6a</i>  | 0.00341918  | 1.871555745  | 4.692280606 | 2.820724861 |
| <i>Gpm6a</i>  | 0.003261623 | 1.702531703  | 4.761382413 | 3.05885071  |
| <i>Gpnmb</i>  | 0.008216162 | 2.007472902  | 8.268326773 | 6.26085387  |
| <i>Gpr160</i> | 2.19E-06    | -1.013141519 | 6.035594383 | 7.048735902 |
| <i>Gpr160</i> | 3.83E-05    | -1.042850814 | 6.046686782 | 7.089537597 |
| <i>Gpr35</i>  | 0.004483646 | 1.852601247  | 3.130291499 | 1.277690251 |
| <i>Gpr35</i>  | 6.22E-05    | 2.251901804  | 3.580923863 | 1.32902206  |
| <i>Gpr35</i>  | 0.020967714 | 1.942818244  | 3.728880255 | 1.78606201  |
| <i>Gpr35</i>  | 0.001021503 | 1.976781498  | 3.814001031 | 1.837219533 |
| <i>Gpr65</i>  | 9.82E-05    | 1.27084046   | 5.050085064 | 3.779244604 |
| <i>Gpr75</i>  | 3.58E-05    | -1.069800742 | 5.306281998 | 6.37608274  |
| <i>Gprc5b</i> | 0.031037581 | 1.122048367  | 5.861998904 | 4.739950537 |
| <i>Gprc5d</i> | 0.010462766 | -1.530384716 | 3.696174638 | 5.226559354 |
| <i>Gprc5d</i> | 2.61E-05    | -1.34735913  | 3.951637222 | 5.298996352 |
| <i>Gpsm3</i>  | 3.07E-05    | 1.089584857  | 7.27567028  | 6.186085423 |
| <i>Gpx3</i>   | 1.30E-06    | 1.094873905  | 11.03136718 | 9.936493277 |
| <i>Grhl1</i>  | 1.22E-05    | -1.039858714 | 8.688012334 | 9.727871048 |
| <i>Gria1</i>  | 0.001573872 | 1.87648161   | 3.303110882 | 1.426629272 |
| <i>Grik2</i>  | 0.019008634 | -1.85647743  | 1.990805769 | 3.847283199 |
| <i>Grip2</i>  | 0.008913468 | 1.581005196  | 3.558731406 | 1.977726211 |
| <i>Gsdmc3</i> | 0.001661253 | 1.540800245  | 6.670476781 | 5.129676536 |

|                |             |              |             |             |
|----------------|-------------|--------------|-------------|-------------|
| <i>Gsdmc3</i>  | 0.005645851 | 1.243313335  | 6.673817291 | 5.430503956 |
| <i>Gsdmc3</i>  | 0.003678866 | 1.44619512   | 6.643172781 | 5.196977661 |
| <i>Gsdmc3</i>  | 0.000996262 | 1.571202704  | 6.768111642 | 5.196908937 |
| <i>Gsdmc3</i>  | 0.00077234  | 1.627988836  | 6.699282797 | 5.07129396  |
| <i>Gsdmc3</i>  | 0.000373972 | 1.56052447   | 6.744580592 | 5.184056122 |
| <i>Gsdmc3</i>  | 0.003723242 | 1.388292856  | 6.643439848 | 5.255146992 |
| <i>Gsdmc3</i>  | 0.000853119 | 1.561587921  | 6.624237829 | 5.062649908 |
| <i>Gsdmc3</i>  | 0.005234859 | 1.526611364  | 6.533967737 | 5.007356373 |
| <i>Gsdmc3</i>  | 0.012917212 | 1.192965814  | 6.444309456 | 5.251343642 |
| <i>Gsdmc3</i>  | 0.003155922 | 1.47426859   | 6.578540718 | 5.104272129 |
| <i>Gsdmc3</i>  | 0.001256884 | 1.524589321  | 6.795346563 | 5.270757243 |
| <i>Gsdmc3</i>  | 0.000690637 | 1.686477271  | 6.726241296 | 5.039764025 |
| <i>Gsdmc3</i>  | 0.010560568 | 1.232272792  | 6.542980557 | 5.310707765 |
| <i>Gsdmc3</i>  | 0.001433038 | 1.551492063  | 6.756111641 | 5.204619578 |
| <i>Gsdmc3</i>  | 0.001658913 | 1.547119422  | 6.636658799 | 5.089539377 |
| <i>Gsdmc3</i>  | 0.002407537 | 1.567274789  | 6.724751684 | 5.157476895 |
| <i>Gsdmc3</i>  | 0.002200446 | 1.390606278  | 6.552762085 | 5.162155806 |
| <i>Gsdmc3</i>  | 0.002134054 | 1.368100061  | 6.740725848 | 5.372625787 |
| <i>Gsg1</i>    | 0.020031415 | -1.252657613 | 2.277772656 | 3.530430269 |
| <i>Gsg1</i>    | 0.01014719  | -1.604148812 | 1.809269377 | 3.413418189 |
| <i>Gtf2a2</i>  | 1.44E-05    | -1.605790578 | 6.134293044 | 7.740083623 |
| <i>Gtse1</i>   | 0.018110559 | 1.069310729  | 3.807491694 | 2.738180965 |
| <i>Gtse1</i>   | 0.000837025 | 2.025608198  | 3.989905179 | 1.964296981 |
| <i>Guca1b</i>  | 0.003825465 | -1.251193253 | 2.665754499 | 3.916947752 |
| <i>Gucy1b2</i> | 0.012300657 | -1.735747937 | 2.256431217 | 3.992179154 |
| <i>Gucy2e</i>  | 0.002939855 | 1.408995612  | 4.577273199 | 3.168277587 |
| <i>Gulo</i>    | 0.000668992 | 1.180620772  | 8.491061292 | 7.31044052  |
| <i>H2-Aa</i>   | 2.11E-06    | 2.196953051  | 9.523113441 | 7.32616039  |
| <i>H2-Aa</i>   | 1.03E-07    | 2.39285545   | 9.595885036 | 7.203029586 |
| <i>H2-Aa</i>   | 1.04E-07    | 2.435552119  | 9.670290809 | 7.234738691 |
| <i>H2-Aa</i>   | 2.84E-07    | 2.364336236  | 9.587072321 | 7.222736085 |
| <i>H2-Ab1</i>  | 6.79E-08    | 2.093047672  | 11.70169826 | 9.608650588 |
| <i>H2-Ab1</i>  | 3.02E-07    | 2.163142068  | 11.74799691 | 9.584854845 |
| <i>H2-Ab1</i>  | 1.17E-08    | 2.193395936  | 11.67189338 | 9.478497441 |
| <i>H2-Ab1</i>  | 5.59E-08    | 2.283734586  | 11.85499803 | 9.571263443 |
| <i>H2-DMa</i>  | 0.030966331 | -1.183000753 | 2.408322934 | 3.591323687 |
| <i>H2-DMb2</i> | 1.11E-06    | 1.103664284  | 4.928132819 | 3.824468534 |
| <i>H2-DMb2</i> | 0.013300775 | 1.703479323  | 4.854057434 | 3.150578111 |
| <i>H2-DMb2</i> | 0.000784141 | 1.153244148  | 4.765467128 | 3.61222298  |
| <i>H2-DMb2</i> | 0.000269569 | 1.752413531  | 5.005026923 | 3.252613391 |
| <i>H2-K1</i>   | 5.56E-06    | 1.842247514  | 12.24721603 | 10.40496852 |
| <i>H2-K1</i>   | 2.28E-05    | 1.665603207  | 12.06085501 | 10.39525181 |
| <i>H2-K1</i>   | 5.80E-06    | 1.717175829  | 12.07102121 | 10.35384538 |
| <i>H2-K1</i>   | 1.17E-05    | 1.771077909  | 12.1908164  | 10.41973849 |
| <i>H2-K1</i>   | 1.09E-06    | 1.993064055  | 12.37183986 | 10.3787758  |
| <i>H2-K1</i>   | 4.15E-06    | 1.966073369  | 12.45763512 | 10.49156175 |

|                  |             |              |             |             |
|------------------|-------------|--------------|-------------|-------------|
| <i>H2-K1</i>     | 2.55E-05    | 1.904791124  | 12.2769139  | 10.37212278 |
| <i>H2-K1</i>     | 6.10E-05    | 1.060318532  | 8.583078985 | 7.522760453 |
| <i>H2-M10.4</i>  | 0.004518847 | 1.308756822  | 4.427016824 | 3.118260001 |
| <i>H2-Ob</i>     | 0.000987539 | 1.4786886    | 4.354167606 | 2.875479006 |
| <i>H2-Ob</i>     | 0.004634244 | 1.005078258  | 4.137645245 | 3.132566987 |
| <i>H2-Q1</i>     | 4.17E-07    | -2.882380864 | 1.263723291 | 4.146104155 |
| <i>H2-Q1</i>     | 0.000454378 | -2.766044158 | 1.40404557  | 4.170089728 |
| <i>H2-Q1</i>     | 0.000769148 | -2.266978176 | 1.75598513  | 4.022963306 |
| <i>H2-Q1</i>     | 0.000149583 | -2.471256933 | 1.413759831 | 3.885016763 |
| <i>H2-Q1</i>     | 0.000578116 | -2.358540559 | 1.561985591 | 3.92052615  |
| <i>H2-Q1</i>     | 0.001146602 | -2.133159457 | 2.056063585 | 4.189223042 |
| <i>H2-Q1</i>     | 0.000241888 | -2.481947354 | 1.504119892 | 3.986067246 |
| <i>H2-Q1</i>     | 5.89E-06    | -2.870544212 | 1.182761339 | 4.053305551 |
| <i>H2-Q1</i>     | 1.00E-05    | -3.012884417 | 0.969041896 | 3.981926313 |
| <i>H2-Q1</i>     | 0.001459116 | -1.688390245 | 2.204206692 | 3.892596937 |
| <i>H2-Q1</i>     | 9.31E-05    | -2.702437025 | 1.447703199 | 4.150140224 |
| <i>H2-Q2</i>     | 4.53E-07    | 1.060904769  | 12.88137407 | 11.8204693  |
| <i>H2-T18</i>    | 1.08E-06    | -1.217789694 | 6.179287126 | 7.397076821 |
| <i>H2-T18</i>    | 3.63E-05    | -1.248369994 | 8.542078464 | 9.790448457 |
| <i>H2-T18</i>    | 9.13E-05    | -1.163043974 | 8.735796039 | 9.898840012 |
| <i>H2-T18</i>    | 1.24E-05    | -1.201463962 | 8.470110171 | 9.671574133 |
| <i>H60b</i>      | 0.007150602 | 2.328330384  | 3.638039208 | 1.309708824 |
| <i>Hacd4</i>     | 0.0014824   | 1.084075481  | 6.619072388 | 5.534996907 |
| <i>Hamp</i>      | 0.001318226 | 1.971778326  | 4.94948577  | 2.977707445 |
| <i>Hbb-y</i>     | 0.01270475  | -2.045602736 | 3.889076904 | 5.93467964  |
| <i>Hbb-y</i>     | 0.000741959 | -1.922839813 | 3.960290345 | 5.883130159 |
| <i>Hcar2</i>     | 0.001459942 | 1.985270839  | 3.146444883 | 1.161174044 |
| <i>Hck</i>       | 0.000672642 | 1.52910357   | 6.518014469 | 4.988910898 |
| <i>Hck</i>       | 0.000202808 | 1.637782341  | 6.57883558  | 4.941053239 |
| <i>Hcls1</i>     | 4.45E-05    | 1.67635279   | 6.859247842 | 5.182895051 |
| <i>Hcrr1</i>     | 1.01E-05    | 1.00796144   | 7.164182545 | 6.156221104 |
| <i>Hdac5</i>     | 3.74E-07    | 1.054758278  | 8.603263814 | 7.548505536 |
| <i>Heatr9</i>    | 0.000592152 | 1.973395565  | 6.072374781 | 4.098979216 |
| <i>Henmt1</i>    | 0.0007036   | 1.306833021  | 4.461047876 | 3.154214855 |
| <i>Hist1h2ad</i> | 1.59E-05    | 1.79501966   | 4.461160629 | 2.666140969 |
| <i>Hist1h2ba</i> | 0.003156614 | -1.445299789 | 2.235907976 | 3.681207765 |
| <i>Hist1h2bk</i> | 1.41E-06    | 2.126704469  | 6.551597938 | 4.424893469 |
| <i>Hk2</i>       | 0.015945219 | 1.55306899   | 3.844079413 | 2.291010423 |
| <i>Hk2</i>       | 0.000225731 | 2.12441242   | 3.790547657 | 1.666135237 |
| <i>Hlx</i>       | 0.000563521 | 1.058414599  | 5.688732863 | 4.630318263 |
| <i>Hmha1</i>     | 4.40E-05    | 1.42202859   | 6.239214248 | 4.817185658 |
| <i>Hmha1</i>     | 1.46E-05    | 1.567883698  | 6.020931571 | 4.453047874 |
| <i>Hmha1</i>     | 0.000471924 | 1.57872337   | 6.137823507 | 4.559100138 |
| <i>Hmha1</i>     | 4.33E-05    | 1.597553007  | 6.02111462  | 4.423561613 |
| <i>Hmha1</i>     | 0.000223692 | 1.859086117  | 6.118788866 | 4.259702749 |
| <i>Hmha1</i>     | 0.000443413 | 1.417179215  | 5.948238212 | 4.531058997 |



|                      |             |              |             |             |
|----------------------|-------------|--------------|-------------|-------------|
| <i>Hnrnpa2b1</i>     | 8.61E-05    | 1.790050198  | 6.528729957 | 4.738679759 |
| <i>Hnrnpa2b1</i>     | 6.97E-05    | 1.791645101  | 6.539392581 | 4.74774748  |
| <i>Hnrnpa2b1</i>     | 0.000470763 | 1.528859637  | 6.418967367 | 4.89010773  |
| <i>Hpgds</i>         | 0.001560794 | 1.522255545  | 4.80938063  | 3.287125086 |
| <i>Hpgds</i>         | 0.000844194 | 1.238042588  | 4.817779837 | 3.579737249 |
| <i>Hps1</i>          | 0.000349936 | 1.057921273  | 8.268917322 | 7.210996049 |
| <i>Hs3st2</i>        | 0.036367622 | -1.298168227 | 2.259836712 | 3.558004939 |
| <i>Hs3st6</i>        | 0.025389377 | -1.200441074 | 3.029564131 | 4.230005205 |
| <i>Hs3st6</i>        | 0.021615382 | -1.043325058 | 3.111821223 | 4.155146281 |
| <i>Hsp90aa1</i>      | 0.00189127  | 1.135703925  | 12.11141609 | 10.97571217 |
| <i>Hspa1a</i>        | 0.002073804 | 4.573696949  | 12.10192938 | 7.528232435 |
| <i>Hspa1a</i>        | 0.001846991 | 4.809457244  | 12.33066844 | 7.521211191 |
| <i>Hspa1a</i>        | 0.001775671 | 4.784236447  | 12.28954514 | 7.50530869  |
| <i>Hspa1a</i>        | 0.001643631 | 4.803207103  | 12.29438195 | 7.491174849 |
| <i>Hspa1b</i>        | 0.001720498 | 4.276176128  | 11.62711972 | 7.350943589 |
| <i>Hspa1b</i>        | 0.001099726 | 4.351269383  | 11.73155127 | 7.380281886 |
| <i>Hspa1b</i>        | 0.001769781 | 4.486241937  | 11.82846877 | 7.342226835 |
| <i>Hspa1b</i>        | 0.001475287 | 4.194346656  | 11.59869449 | 7.404347831 |
| <i>Hspa4l</i>        | 0.001072947 | 1.046953293  | 8.208125345 | 7.161172052 |
| <i>Hspa8</i>         | 0.000318649 | 1.612905883  | 13.93885323 | 12.32594735 |
| <i>Hspb9</i>         | 0.016151944 | -1.103818577 | 2.588909105 | 3.692727682 |
| <i>Hsph1</i>         | 0.009052941 | 1.648384416  | 10.66248201 | 9.014097595 |
| <i>Hsph1</i>         | 0.007618364 | 1.93640206   | 10.93058721 | 8.994185153 |
| <i>Hsph1</i>         | 0.008674175 | 1.677866543  | 10.70466197 | 9.026795426 |
| <i>Hsph1</i>         | 0.011222964 | 1.686450592  | 10.72630246 | 9.039851866 |
| <i>Htatip2</i>       | 0.002334467 | -1.030017569 | 6.741903921 | 7.77192149  |
| <i>Htr7</i>          | 0.003291957 | 1.02863019   | 5.56126651  | 4.53263632  |
| <i>I830077J02Rik</i> | 0.000421705 | 1.064580869  | 4.550898134 | 3.486317264 |
| <i>Ido1</i>          | 1.03E-06    | 5.096074695  | 6.707048204 | 1.610973508 |
| <i>Ido1</i>          | 1.18E-07    | 5.248262151  | 6.480981598 | 1.232719447 |
| <i>lfi203</i>        | 2.02E-05    | 1.033012289  | 5.039008657 | 4.005996369 |
| <i>lfi205</i>        | 0.000341081 | 1.047284395  | 8.7386856   | 7.691401205 |
| <i>lfi27l2a</i>      | 0.042022827 | 1.379925969  | 9.00693935  | 7.627013382 |
| <i>lfi47</i>         | 1.04E-05    | 1.611179587  | 5.872665531 | 4.261485944 |
| <i>lfi47</i>         | 0.000203358 | 1.769346107  | 6.051263994 | 4.281917887 |
| <i>lfi47</i>         | 6.05E-07    | 1.320852103  | 5.783891943 | 4.46303984  |
| <i>lfi47</i>         | 6.00E-06    | 1.504226792  | 5.925747425 | 4.421520633 |
| <i>lfi47</i>         | 0.000970462 | 1.267467645  | 5.783860472 | 4.516392827 |
| <i>lfi47</i>         | 6.14E-05    | 1.710052316  | 5.84486191  | 4.134809594 |
| <i>lfi47</i>         | 1.10E-05    | 1.499211399  | 5.897709369 | 4.39849797  |
| <i>lfi47</i>         | 0.00013215  | 1.716087453  | 5.938095012 | 4.222007558 |
| <i>lfi47</i>         | 0.000522682 | 1.520389792  | 5.769826265 | 4.249436473 |
| <i>lfi47</i>         | 0.000180794 | 1.494314006  | 5.952515095 | 4.45820109  |
| <i>lfi47</i>         | 1.97E-05    | 1.377272083  | 5.927028985 | 4.549756902 |
| <i>lfi47</i>         | 0.000435779 | 1.681628386  | 5.888644113 | 4.207015728 |
| <i>lfit1</i>         | 0.000333289 | 2.606133286  | 5.551603068 | 2.945469781 |

|                |             |             |             |             |
|----------------|-------------|-------------|-------------|-------------|
| <i>lfit1b1</i> | 1.45E-05    | 5.172112703 | 6.764374325 | 1.592261622 |
| <i>lfit1b1</i> | 5.87E-08    | 5.640065424 | 6.890793528 | 1.250728104 |
| <i>lfit1b1</i> | 1.50E-06    | 5.183888335 | 6.703222115 | 1.51933378  |
| <i>lfit3</i>   | 0.000225485 | 1.656731793 | 5.211587412 | 3.554855618 |
| <i>lfitm3</i>  | 0.00062353  | 1.216655198 | 11.77103002 | 10.55437482 |
| <i>lgfbp4</i>  | 9.19E-06    | 1.031064773 | 11.01516299 | 9.984098212 |
| <i>lgsf10</i>  | 9.98E-05    | 1.048833672 | 5.658192991 | 4.609359319 |
| <i>lgsf5</i>   | 5.60E-06    | 1.56421258  | 8.004933494 | 6.440720915 |
| <i>lgsf5</i>   | 2.73E-05    | 1.734424275 | 8.516735946 | 6.78231167  |
| <i>lgsf5</i>   | 7.40E-05    | 1.774055617 | 8.433403434 | 6.659347818 |
| <i>lgsf9b</i>  | 0.000373308 | 1.479246225 | 4.661188827 | 3.181942602 |
| <i>lgsf9b</i>  | 0.012436201 | 1.11718997  | 4.513878884 | 3.396688914 |
| <i>lgtp</i>    | 0.00036572  | 1.020406389 | 8.331081472 | 7.310675083 |
| <i>lgtp</i>    | 0.00033948  | 1.094127893 | 8.405438279 | 7.311310387 |
| <i>ligp1</i>   | 3.32E-05    | 1.320850153 | 6.073129766 | 4.752279613 |
| <i>ligp1</i>   | 0.000735522 | 1.277594976 | 5.903277843 | 4.625682867 |
| <i>ligp1</i>   | 0.00014991  | 1.772633596 | 5.832007373 | 4.059373777 |
| <i>ligp1</i>   | 8.47E-05    | 1.261466942 | 5.955241111 | 4.693774169 |
| <i>ligp1</i>   | 1.08E-05    | 1.602066363 | 6.233687515 | 4.631621152 |
| <i>ligp1</i>   | 0.00017427  | 1.313467221 | 5.853847546 | 4.540380325 |
| <i>lkzf1</i>   | 0.000317582 | 1.902116781 | 5.133275818 | 3.231159037 |
| <i>lkzf1</i>   | 4.70E-06    | 2.234603199 | 5.408449806 | 3.173846608 |
| <i>lkzf1</i>   | 0.000206585 | 1.333032064 | 4.939854029 | 3.606821965 |
| <i>lkzf1</i>   | 0.000172845 | 2.38402123  | 5.18981843  | 2.805797201 |
| <i>lkzf1</i>   | 0.001454024 | 1.763063283 | 5.053422885 | 3.290359602 |
| <i>lkzf1</i>   | 0.002906784 | 2.336420815 | 5.28603524  | 2.949614425 |
| <i>lkzf1</i>   | 0.000309281 | 2.648069461 | 5.327158109 | 2.679088648 |
| <i>lkzf1</i>   | 1.76E-05    | 2.030147005 | 5.442548054 | 3.412401049 |
| <i>lkzf1</i>   | 1.29E-05    | 1.640715539 | 5.157784464 | 3.517068925 |
| <i>lkzf1</i>   | 0.000135964 | 1.887563341 | 5.22007488  | 3.332511539 |
| <i>lkzf1</i>   | 9.39E-06    | 2.174175623 | 5.518066522 | 3.343890899 |
| <i>lkzf1</i>   | 0.001394875 | 2.381121763 | 5.047304148 | 2.666182385 |
| <i>lkzf1</i>   | 0.001889539 | 1.881119652 | 5.100037144 | 3.218917491 |
| <i>lkzf1</i>   | 0.002358893 | 1.86063642  | 5.146806862 | 3.286170442 |
| <i>lkzf1</i>   | 0.000585057 | 1.451595858 | 5.114343245 | 3.662747387 |
| <i>lkzf1</i>   | 0.001014104 | 1.936192348 | 5.117945719 | 3.181753371 |
| <i>lkzf1</i>   | 0.000450108 | 1.967615384 | 5.204892381 | 3.237276997 |
| <i>lkzf1</i>   | 0.000402029 | 2.225933066 | 5.122253574 | 2.896320508 |
| <i>lkzf1</i>   | 0.000618281 | 1.761486135 | 5.212216431 | 3.450730296 |
| <i>lkzf1</i>   | 5.14E-05    | 2.12022787  | 5.175670435 | 3.055442565 |
| <i>lkzf1</i>   | 0.006634028 | 2.413643844 | 5.130239964 | 2.71659612  |
| <i>lkzf1</i>   | 0.000927412 | 1.924034004 | 5.083525428 | 3.159491424 |
| <i>lkzf1</i>   | 0.0005637   | 1.747047729 | 5.296265404 | 3.549217676 |
| <i>lkzf1</i>   | 1.93E-05    | 2.213342683 | 5.273247328 | 3.059904645 |
| <i>lkzf1</i>   | 0.000378881 | 1.847281811 | 5.262197994 | 3.414916183 |
| <i>lkzf1</i>   | 5.18E-05    | 1.589167088 | 5.099232984 | 3.510065896 |

|               |             |              |             |             |
|---------------|-------------|--------------|-------------|-------------|
| <i>lkzf1</i>  | 0.001086343 | 2.081360262  | 5.189476351 | 3.10811609  |
| <i>lkzf1</i>  | 0.000314916 | 1.849185358  | 5.138216008 | 3.28903065  |
| <i>lkzf4</i>  | 5.20E-05    | 1.271104004  | 9.668880572 | 8.397776567 |
| <i>lkzf4</i>  | 2.93E-05    | 1.210281017  | 9.681899159 | 8.471618141 |
| <i>ll10ra</i> | 9.12E-05    | 2.162438973  | 5.309608326 | 3.147169353 |
| <i>ll10ra</i> | 0.00012729  | 1.502452157  | 5.16906812  | 3.666615963 |
| <i>ll1b</i>   | 2.49E-05    | 2.776768954  | 6.526597302 | 3.749828348 |
| <i>ll1f9</i>  | 0.024772929 | 1.275024283  | 4.142735788 | 2.867711505 |
| <i>ll1rl1</i> | 0.000166724 | 2.063625399  | 3.349939252 | 1.286313853 |
| <i>ll1rn</i>  | 1.42E-07    | 5.610599617  | 6.739742362 | 1.129142744 |
| <i>ll1rn</i>  | 1.30E-07    | 5.862891117  | 6.749621917 | 0.8867308   |
| <i>ll1rn</i>  | 6.47E-08    | 5.892074003  | 6.750799435 | 0.858725432 |
| <i>ll2rg</i>  | 3.48E-05    | 1.473461811  | 6.231536889 | 4.758075078 |
| <i>ll2rg</i>  | 6.12E-05    | 1.441671737  | 6.098469317 | 4.65679758  |
| <i>ll2rg</i>  | 6.88E-06    | 1.218233481  | 6.209483193 | 4.991249711 |
| <i>ll4ra</i>  | 0.000184611 | 1.099190213  | 6.03791499  | 4.938724777 |
| <i>ll7r</i>   | 0.001917474 | 2.161855216  | 4.31964746  | 2.157792244 |
| <i>ll7r</i>   | 0.003420186 | 2.219742662  | 4.010069201 | 1.790326539 |
| <i>lmpg1</i>  | 7.88E-05    | 1.265955002  | 10.39691366 | 9.130958658 |
| <i>lncenp</i> | 0.000240077 | 1.043086386  | 4.912057419 | 3.868971032 |
| <i>lnpp4b</i> | 0.002082877 | 1.643208003  | 3.418221239 | 1.775013236 |
| <i>lnpp4b</i> | 0.003654179 | 1.990050957  | 3.582626828 | 1.59257587  |
| <i>lnpp5d</i> | 3.70E-06    | 1.642647732  | 6.566079277 | 4.923431545 |
| <i>lnpp5d</i> | 6.63E-06    | 1.594731775  | 6.585491323 | 4.990759549 |
| <i>lnpp5d</i> | 4.47E-05    | 1.81170814   | 6.636819803 | 4.825111662 |
| <i>lnpp5d</i> | 3.31E-05    | 1.755310257  | 6.72618768  | 4.970877423 |
| <i>lnpp5d</i> | 8.62E-05    | 1.614766506  | 6.651724543 | 5.036958037 |
| <i>lnpp5d</i> | 4.41E-06    | 1.536700576  | 6.601313842 | 5.064613266 |
| <i>lnpp5d</i> | 4.80E-05    | 1.52807003   | 6.451040843 | 4.922970814 |
| <i>lnpp5d</i> | 1.21E-05    | 1.593052821  | 6.488555628 | 4.895502807 |
| <i>lnpp5d</i> | 1.35E-05    | 1.376917315  | 6.572561455 | 5.195644141 |
| <i>lqcb1</i>  | 2.71E-06    | 1.383340641  | 10.8952289  | 9.51188826  |
| <i>lqcb1</i>  | 2.70E-05    | 1.264836034  | 10.67037708 | 9.405541051 |
| <i>lqcb1</i>  | 4.20E-06    | 1.507332384  | 11.16593759 | 9.658605209 |
| <i>lqcb1</i>  | 5.81E-06    | 1.272009063  | 10.74124388 | 9.469234817 |
| <i>lqcf3</i>  | 0.002374142 | -1.192877108 | 2.803940813 | 3.996817921 |
| <i>lqgap3</i> | 0.017989798 | 1.40676342   | 3.899287492 | 2.492524072 |
| <i>lqgap3</i> | 0.00654143  | 1.826743649  | 3.802288072 | 1.975544423 |
| <i>lrf4</i>   | 0.002493611 | 1.567772148  | 3.928377765 | 2.360605617 |
| <i>lrf5</i>   | 1.65E-05    | 1.609927741  | 5.550862325 | 3.940934584 |
| <i>lrf5</i>   | 0.000508569 | 1.293082796  | 5.441860817 | 4.148778021 |
| <i>lrf5</i>   | 0.000652143 | 2.152414293  | 5.793365433 | 3.64095114  |
| <i>lrf5</i>   | 1.25E-05    | 1.544505062  | 5.622198392 | 4.07769333  |
| <i>lrf5</i>   | 0.000115712 | 1.762693962  | 5.761333169 | 3.998639207 |
| <i>lrf5</i>   | 1.36E-06    | 1.597049886  | 5.348874499 | 3.751824613 |
| <i>lrf5</i>   | 7.45E-05    | 1.734690274  | 5.640934144 | 3.906243869 |

|               |             |              |             |             |
|---------------|-------------|--------------|-------------|-------------|
| <i>lrf5</i>   | 0.000146191 | 1.54767535   | 5.566050902 | 4.018375552 |
| <i>lrf7</i>   | 1.58E-06    | 1.324219955  | 7.539552787 | 6.215332832 |
| <i>lrf7</i>   | 1.51E-06    | 1.347204666  | 7.639704606 | 6.292499941 |
| <i>lrf7</i>   | 2.90E-06    | 1.476755611  | 7.593967936 | 6.117212325 |
| <i>lrf7</i>   | 4.00E-07    | 1.403255319  | 7.609152857 | 6.205897538 |
| <i>lrf9</i>   | 1.10E-06    | 1.16217223   | 9.718841104 | 8.556668874 |
| <i>lrf9</i>   | 1.17E-06    | 1.152789878  | 9.869098889 | 8.716309011 |
| <i>lrgc1</i>  | 0.003263762 | -1.232915878 | 5.464533426 | 6.697449304 |
| <i>lrgc1</i>  | 7.54E-05    | -1.149417382 | 5.528801961 | 6.678219342 |
| <i>lrgc1</i>  | 0.00037372  | -1.041643074 | 5.606225417 | 6.647868491 |
| <i>lrgm1</i>  | 1.33E-05    | 1.176415428  | 7.428910872 | 6.252495444 |
| <i>lrgm1</i>  | 1.36E-05    | 1.244862029  | 7.659744148 | 6.414882119 |
| <i>lrgm1</i>  | 6.87E-06    | 1.173401119  | 7.418191026 | 6.244789907 |
| <i>lrgm1</i>  | 1.95E-05    | 1.317058429  | 7.714491141 | 6.397432712 |
| <i>lrgm1</i>  | 2.56E-05    | 1.194523431  | 7.533717797 | 6.339194366 |
| <i>lrgm1</i>  | 1.03E-05    | 1.377810664  | 7.675899971 | 6.298089307 |
| <i>lrgm2</i>  | 0.000103795 | 1.243494076  | 5.577192195 | 4.333698119 |
| <i>lrgm2</i>  | 8.03E-06    | 1.156158077  | 5.316540459 | 4.160382382 |
| <i>ltga2</i>  | 8.22E-06    | 1.013154949  | 9.139286426 | 8.126131477 |
| <i>ltga4</i>  | 0.000930372 | 1.146678651  | 5.411579286 | 4.264900635 |
| <i>ltgae</i>  | 0.001246611 | -1.064304045 | 5.037413475 | 6.10171752  |
| <i>ltgal</i>  | 0.001150938 | 2.389535747  | 4.405756417 | 2.01622067  |
| <i>ltgal</i>  | 0.000288043 | 1.713045312  | 4.552754186 | 2.839708874 |
| <i>ltgal</i>  | 0.003433142 | 1.969757136  | 4.622511484 | 2.652754348 |
| <i>ltgal</i>  | 0.00123747  | 2.20458469   | 3.992463147 | 1.787878457 |
| <i>ltgam</i>  | 3.37E-05    | 1.620667837  | 7.533653951 | 5.912986114 |
| <i>ltgam</i>  | 6.25E-05    | 1.38761138   | 7.362997919 | 5.975386539 |
| <i>ltgax</i>  | 5.47E-05    | 1.563300254  | 5.477638342 | 3.914338087 |
| <i>ltgax</i>  | 7.42E-05    | 1.848339864  | 5.694936312 | 3.846596448 |
| <i>ltgb2</i>  | 0.00106236  | 1.588387912  | 6.796965657 | 5.208577744 |
| <i>ltgb2</i>  | 0.000349741 | 1.662228525  | 6.810864479 | 5.148635954 |
| <i>ltgb2</i>  | 0.000138785 | 1.47679594   | 6.815303733 | 5.338507793 |
| <i>ltgb2</i>  | 0.0003686   | 1.552760307  | 6.875465947 | 5.322705639 |
| <i>ltgb2l</i> | 0.000418249 | 1.043399841  | 5.059744156 | 4.016344315 |
| <i>ltgb2l</i> | 0.006589271 | 1.099156212  | 5.189715315 | 4.090559103 |
| <i>ltgb4</i>  | 3.11E-05    | 1.035538861  | 7.353346747 | 6.317807886 |
| <i>ltgb4</i>  | 2.39E-07    | 1.224952698  | 7.51890636  | 6.293953662 |
| <i>ltgb4</i>  | 3.87E-05    | 1.230001251  | 7.286017787 | 6.056016536 |
| <i>ltgb6</i>  | 4.46E-05    | 2.979113995  | 6.117756531 | 3.138642535 |
| <i>ltgb6</i>  | 0.000110135 | 2.049985798  | 6.183234926 | 4.133249128 |
| <i>ltgb6</i>  | 2.90E-05    | 3.223758528  | 6.185397022 | 2.961638493 |
| <i>ltgb6</i>  | 0.000239076 | 3.160561049  | 5.909890703 | 2.749329653 |
| <i>ltgb6</i>  | 0.000448851 | 3.747378345  | 5.96885844  | 2.221480095 |
| <i>ltgb6</i>  | 9.70E-05    | 3.235250191  | 6.003053746 | 2.767803555 |
| <i>ltgb7</i>  | 0.000318291 | 1.351928095  | 5.259218215 | 3.90729012  |
| <i>ltgb7</i>  | 0.002228009 | 1.009627048  | 5.025829403 | 4.016202355 |

|                |             |              |             |             |
|----------------|-------------|--------------|-------------|-------------|
| <i>Itpr1l1</i> | 0.00208782  | 1.008836992  | 5.736335827 | 4.727498835 |
| <i>Itpr1l1</i> | 0.000203505 | 1.132877264  | 5.640675905 | 4.507798641 |
| <i>Itpr1l1</i> | 0.000402339 | 1.010601919  | 5.719527307 | 4.708925389 |
| <i>Ivl</i>     | 0.000345978 | 2.584308512  | 3.487223219 | 0.902914707 |
| <i>Jak3</i>    | 1.18E-05    | 1.449229775  | 4.749897729 | 3.300667954 |
| <i>Jakmip2</i> | 0.035909121 | -1.339831047 | 2.390353209 | 3.730184256 |
| <i>Kalrn</i>   | 0.00400261  | 1.289279707  | 4.805613295 | 3.516333589 |
| <i>Kalrn</i>   | 0.0106086   | 1.0434986    | 4.402036051 | 3.35853745  |
| <i>Kalrn</i>   | 0.011969908 | 1.26828224   | 4.411963187 | 3.143680947 |
| <i>Kalrn</i>   | 0.000487469 | 1.018342822  | 4.422003627 | 3.403660804 |
| <i>Kcna2</i>   | 0.036655572 | 1.36165009   | 4.516329543 | 3.154679453 |
| <i>Kcna2</i>   | 0.031510315 | 1.482829937  | 4.365094156 | 2.88226422  |
| <i>Kcna3</i>   | 0.021268701 | 1.66926034   | 4.292354076 | 2.623093736 |
| <i>Kcna5</i>   | 0.000987165 | -1.446789915 | 2.107822034 | 3.554611949 |
| <i>Kcnc1</i>   | 0.003195491 | 2.200252111  | 4.13673127  | 1.936479159 |
| <i>Kcnc1</i>   | 0.014373307 | 1.3495626    | 4.483133641 | 3.133571042 |
| <i>Kcnc1</i>   | 0.001224321 | 1.43930628   | 4.638878208 | 3.199571927 |
| <i>Kcnd1</i>   | 0.017492638 | 1.228817721  | 3.642091613 | 2.413273893 |
| <i>Kcnh7</i>   | 0.003567497 | 1.968511939  | 8.187955162 | 6.219443223 |
| <i>Kcnh7</i>   | 0.001796013 | 1.495197516  | 8.099143234 | 6.603945718 |
| <i>Kcnh7</i>   | 2.67E-05    | 1.901755618  | 8.415142767 | 6.51338715  |
| <i>Kcnip1</i>  | 0.045164711 | -1.254804319 | 2.255752426 | 3.510556745 |
| <i>Kcnj15</i>  | 0.000465082 | 2.130826462  | 3.410957162 | 1.280130699 |
| <i>Kcnj15</i>  | 0.00143026  | 1.934694426  | 3.611160002 | 1.676465575 |
| <i>Kcnk5</i>   | 0.005350742 | 1.728075073  | 4.323255811 | 2.595180738 |
| <i>Kcnn1</i>   | 0.010060502 | -1.358244451 | 2.232824048 | 3.591068499 |
| <i>Kcnn1</i>   | 0.00074338  | -2.115806923 | 1.474071765 | 3.589878688 |
| <i>Kcnn1</i>   | 0.014684092 | -1.487244453 | 2.232474911 | 3.719719364 |
| <i>Kcnn4</i>   | 0.001222715 | 2.155196662  | 5.789408075 | 3.634211412 |
| <i>Kcnn4</i>   | 0.002605917 | 1.893097623  | 5.300469093 | 3.40737147  |
| <i>Kcnq1</i>   | 0.002540843 | 1.798754797  | 6.318078044 | 4.519323247 |
| <i>Kcnq1</i>   | 0.028603973 | 1.22869365   | 6.713677989 | 5.484984339 |
| <i>Kcnq1</i>   | 0.012102935 | 1.630324402  | 6.096699964 | 4.466375563 |
| <i>Kcnq1</i>   | 0.001976515 | 1.888837645  | 6.405869762 | 4.517032116 |
| <i>Kcnq1</i>   | 0.012269363 | 1.380325391  | 6.793613949 | 5.413288558 |
| <i>Kcnq1</i>   | 0.014598215 | 1.371404775  | 6.750780361 | 5.379375586 |
| <i>Kcnq1</i>   | 0.002874126 | 2.155901216  | 6.330012507 | 4.174111291 |
| <i>Kcnq1</i>   | 0.033198119 | 1.293692528  | 6.721550785 | 5.427858257 |
| <i>Kcnq2</i>   | 0.009621864 | -1.650111852 | 1.780834135 | 3.430945987 |
| <i>Kcns3</i>   | 0.043535657 | 1.708855875  | 4.545078068 | 2.836222192 |
| <i>Kcns3</i>   | 0.018070243 | 1.530669788  | 4.584791666 | 3.054121877 |
| <i>Kcns3</i>   | 0.001359337 | 1.585168192  | 4.857719045 | 3.272550853 |
| <i>Kcns3</i>   | 0.001498748 | 1.87387549   | 4.462933766 | 2.589058276 |
| <i>Kcns3</i>   | 0.00767305  | 1.3100247    | 4.753469314 | 3.443444614 |
| <i>Kctd14</i>  | 0.013607771 | 1.265265637  | 4.363685675 | 3.098420038 |
| <i>Kctd14</i>  | 0.004038872 | 1.151975597  | 4.27834519  | 3.126369592 |

|                     |             |              |             |             |
|---------------------|-------------|--------------|-------------|-------------|
| <i>Kif11</i>        | 0.025318076 | 1.027438067  | 3.994845621 | 2.967407554 |
| <i>Kif14</i>        | 0.04544603  | 1.760578736  | 3.081991695 | 1.321412959 |
| <i>Kif18b</i>       | 0.00042068  | 1.216293513  | 4.988297436 | 3.772003923 |
| <i>Kif18b</i>       | 0.005946471 | 1.364986997  | 4.980915105 | 3.615928108 |
| <i>Kif21a</i>       | 0.042838597 | 1.239851677  | 3.544280873 | 2.304429196 |
| <i>Kif22</i>        | 0.000167036 | 1.555381241  | 4.084929888 | 2.529548646 |
| <i>Kif22</i>        | 0.009393462 | 1.556763765  | 4.117446716 | 2.56068295  |
| <i>Kif2c</i>        | 0.044802605 | 1.010539439  | 6.505509025 | 5.494969585 |
| <i>Kif4</i>         | 0.009203814 | 2.116168699  | 3.881284939 | 1.76511624  |
| <i>Kif4</i>         | 0.004222096 | 1.12745072   | 3.681052573 | 2.553601853 |
| <i>Kif4</i>         | 0.006228801 | 2.15232642   | 3.8617018   | 1.70937538  |
| <i>Kif9</i>         | 0.000595691 | 1.091202335  | 8.878572995 | 7.787370659 |
| <i>Kit</i>          | 0.001782892 | 1.07950923   | 5.784185302 | 4.704676071 |
| <i>Klf10</i>        | 2.90E-05    | 1.053665453  | 6.667508036 | 5.613842584 |
| <i>Klf5</i>         | 1.04E-07    | 1.969935058  | 8.869459978 | 6.89952492  |
| <i>Klhdc9</i>       | 0.000107468 | -1.361120574 | 4.17644048  | 5.537561054 |
| <i>Klhl10</i>       | 0.00699705  | -1.072223636 | 3.537383427 | 4.609607063 |
| <i>Klhl3</i>        | 0.002438296 | -1.065220924 | 3.895743654 | 4.960964577 |
| <i>Klra17</i>       | 0.004262076 | 2.223211514  | 3.669579583 | 1.446368069 |
| <i>Klra17</i>       | 0.00132354  | 1.099715585  | 3.668703986 | 2.568988401 |
| <i>Klrb1</i>        | 0.016493946 | 1.04605264   | 7.925443635 | 6.879390995 |
| <i>Klrb1b</i>       | 0.014786657 | 1.191481949  | 4.502404705 | 3.310922757 |
| <i>Klrg2</i>        | 0.001581274 | 1.656444975  | 4.079278194 | 2.422833219 |
| <i>Kntc1</i>        | 9.78E-05    | 2.137280334  | 3.522959762 | 1.385679427 |
| <i>Krt15</i>        | 3.67E-05    | 1.514524662  | 11.45171874 | 9.937194077 |
| <i>Krt35</i>        | 0.006839525 | 1.384331541  | 3.717852015 | 2.333520474 |
| <i>Krt4</i>         | 3.53E-07    | 1.55363203   | 8.639039842 | 7.085407812 |
| <i>Krt6a</i>        | 2.96E-07    | 4.883392021  | 6.144455562 | 1.261063541 |
| <i>Krt7</i>         | 0.000630932 | 1.45589175   | 8.281874913 | 6.825983162 |
| <i>Kynu</i>         | 0.019565637 | 1.42181256   | 4.02796864  | 2.60615608  |
| <i>Kynu</i>         | 0.000820293 | 1.658538175  | 3.851705846 | 2.193167671 |
| <i>LOC100044068</i> | 0.000518649 | 1.339417687  | 5.805755325 | 4.466337638 |
| <i>LOC100862473</i> | 0.000175703 | 1.037393284  | 6.916732252 | 5.879338968 |
| <i>LOC102642386</i> | 0.000605053 | -1.24682863  | 3.680263486 | 4.927092117 |
| <i>LOC102642386</i> | 0.000792403 | -1.061379933 | 2.788400554 | 3.849780487 |
| <i>LOC105244402</i> | 1.57E-05    | -1.644646964 | 1.887713872 | 3.532360836 |
| <i>LOC108167370</i> | 0.000121922 | -1.797477773 | 3.063241812 | 4.860719585 |
| <i>LOC108167801</i> | 0.000571765 | -1.666936533 | 4.325501366 | 5.992437898 |
| <i>LOC108167874</i> | 5.56E-07    | -1.125544291 | 6.485052381 | 7.610596672 |
| <i>LOC108167963</i> | 6.50E-06    | -1.241171446 | 5.698744103 | 6.939915549 |
| <i>LOC108168098</i> | 9.65E-07    | -1.60616377  | 6.055622973 | 7.661786744 |
| <i>LOC108168307</i> | 2.90E-05    | -2.193306506 | 2.754710746 | 4.948017252 |
| <i>LOC108168644</i> | 0.000242991 | -2.118815051 | 2.394115043 | 4.512930094 |
| <i>LOC108168644</i> | 0.001012392 | -1.627417651 | 2.984284138 | 4.61170179  |
| <i>LOC108168644</i> | 0.002100407 | -1.644723436 | 2.845822396 | 4.490545832 |
| <i>LOC108168644</i> | 0.00881901  | -2.243280957 | 2.170390004 | 4.413670961 |

|                     |             |              |             |             |
|---------------------|-------------|--------------|-------------|-------------|
| <i>LOC108168644</i> | 0.000244287 | -1.577016457 | 3.089949911 | 4.666966368 |
| <i>LOC108169201</i> | 0.024409755 | 1.039599013  | 3.733821785 | 2.694222772 |
| <i>Lacc1</i>        | 0.010118905 | 1.172775361  | 3.965553916 | 2.792778554 |
| <i>Lair1</i>        | 0.016366708 | 1.642989601  | 3.837430512 | 2.194440911 |
| <i>Lair1</i>        | 8.01E-05    | 1.830017124  | 4.21836066  | 2.388343536 |
| <i>Lair1</i>        | 0.000330116 | 1.81588288   | 4.084714806 | 2.268831925 |
| <i>Lair1</i>        | 0.000862122 | 2.256697696  | 4.209245122 | 1.952547425 |
| <i>Lair1</i>        | 0.000627988 | 2.573481262  | 4.165865032 | 1.592383771 |
| <i>Lair1</i>        | 0.005952245 | 1.68664293   | 4.184564042 | 2.497921112 |
| <i>Lair1</i>        | 0.001856763 | 1.736948548  | 4.215984946 | 2.479036399 |
| <i>Lama3</i>        | 0.009593911 | 1.042274522  | 4.55585022  | 3.513575698 |
| <i>Lancl1</i>       | 0.00043725  | -1.059807011 | 5.21221981  | 6.27202682  |
| <i>Laptm5</i>       | 2.07E-06    | 1.961896082  | 9.677799969 | 7.715903888 |
| <i>Laptm5</i>       | 1.11E-06    | 1.801070983  | 9.747422733 | 7.94635175  |
| <i>Laptm5</i>       | 1.55E-06    | 2.012469756  | 9.980997813 | 7.968528057 |
| <i>Lat2</i>         | 0.005252486 | 1.09080809   | 5.793322428 | 4.702514338 |
| <i>Lat2</i>         | 0.003280102 | 1.050932825  | 5.681186195 | 4.63025337  |
| <i>Lbp</i>          | 3.57E-09    | 1.398559497  | 8.887834247 | 7.489274751 |
| <i>Lce6a</i>        | 9.07E-05    | 2.487990944  | 4.942745414 | 2.45475447  |
| <i>Lce6a</i>        | 0.031526502 | 1.052652943  | 3.775760189 | 2.723107247 |
| <i>Lcn2</i>         | 2.96E-08    | 4.724913191  | 11.43996908 | 6.715055891 |
| <i>Lect1</i>        | 0.002458477 | 1.995805575  | 3.835623348 | 1.839817772 |
| <i>Lect1</i>        | 0.002943351 | 2.25804722   | 3.742983482 | 1.484936262 |
| <i>Lekr1</i>        | 0.006167571 | -1.050393939 | 3.716977733 | 4.767371672 |
| <i>Lgals3bp</i>     | 4.94E-09    | 2.191069456  | 10.17905742 | 7.987987963 |
| <i>Lgals9</i>       | 5.24E-05    | 1.665047864  | 7.391744448 | 5.726696584 |
| <i>Lgals9</i>       | 1.65E-06    | 1.848395008  | 7.358285514 | 5.509890506 |
| <i>Lgmn</i>         | 1.23E-07    | 1.201093396  | 8.653562427 | 7.452469031 |
| <i>Lifr</i>         | 0.004316886 | 1.104911415  | 7.205025078 | 6.100113663 |
| <i>Lifr</i>         | 0.005999331 | 1.085204507  | 7.230147483 | 6.144942976 |
| <i>Lifr</i>         | 0.000155458 | 1.159759081  | 7.113136617 | 5.953377536 |
| <i>Lifr</i>         | 0.00167686  | 1.110968054  | 7.28716686  | 6.176198806 |
| <i>Lifr</i>         | 0.000599773 | 1.241342457  | 7.30752163  | 6.066179173 |
| <i>Lifr</i>         | 0.002544155 | 1.074393304  | 7.144240485 | 6.06984718  |
| <i>Lifr</i>         | 0.00591039  | 1.108718847  | 7.225577501 | 6.116858654 |
| <i>Lilr4b</i>       | 0.000110225 | 1.993682931  | 7.646539445 | 5.652856515 |
| <i>Lilr4b</i>       | 1.97E-05    | 1.604497477  | 7.588381197 | 5.98388372  |
| <i>Lilr4b</i>       | 5.67E-05    | 1.618187256  | 7.60917106  | 5.990983804 |
| <i>Lilrb4a</i>      | 2.01E-05    | 1.591512528  | 7.053325075 | 5.461812547 |
| <i>Lilrb4a</i>      | 2.23E-06    | 1.867963045  | 7.177108183 | 5.309145138 |
| <i>Lilrb4a</i>      | 0.000154156 | 1.814452219  | 7.096093238 | 5.281641019 |
| <i>Lilrb4a</i>      | 2.07E-05    | 1.865042018  | 7.126634072 | 5.261592055 |
| <i>Lilrb4a</i>      | 0.000205381 | 1.913235159  | 7.124080081 | 5.210844922 |
| <i>Lilrb4a</i>      | 1.70E-05    | 1.917788107  | 7.068561819 | 5.150773712 |
| <i>Lin7a</i>        | 0.000125338 | 1.020331663  | 7.735651815 | 6.715320151 |
| <i>Lipa</i>         | 0.000171887 | 1.055973361  | 6.154187669 | 5.098214309 |

|               |             |              |             |             |
|---------------|-------------|--------------|-------------|-------------|
| <i>Lmo1</i>   | 0.004946211 | 1.341516332  | 6.091029615 | 4.749513283 |
| <i>Lox</i>    | 0.000371017 | 1.391900761  | 7.659788694 | 6.267887933 |
| <i>Lox</i>    | 0.000106365 | 1.209384395  | 7.411325726 | 6.201941331 |
| <i>Lox</i>    | 0.000111261 | 1.23003233   | 7.5366559   | 6.30662357  |
| <i>Loxhd1</i> | 8.77E-06    | 1.11222071   | 5.854211235 | 4.741990525 |
| <i>Loxl1</i>  | 3.07E-05    | 1.075503962  | 8.676295949 | 7.600791988 |
| <i>Lpgat1</i> | 0.000586931 | 1.207910257  | 8.445491908 | 7.237581651 |
| <i>Lpgat1</i> | 0.000451226 | 1.206678575  | 8.367798171 | 7.161119596 |
| <i>Lpgat1</i> | 0.000140619 | 1.306759169  | 8.454902566 | 7.148143397 |
| <i>Lpo</i>    | 0.001852943 | 3.649393347  | 4.775033147 | 1.125639801 |
| <i>Lpo</i>    | 0.002796617 | 3.620075108  | 4.616031303 | 0.995956195 |
| <i>Lpo</i>    | 0.049535603 | 2.755125339  | 4.392498723 | 1.637373384 |
| <i>Lrig1</i>  | 0.000322374 | 1.157609357  | 8.729229737 | 7.571620379 |
| <i>Lrig1</i>  | 0.000739933 | 1.107280112  | 8.579166433 | 7.471886321 |
| <i>Lrig1</i>  | 0.016860757 | 1.084379412  | 8.320246535 | 7.235867122 |
| <i>Lrmp</i>   | 0.008903666 | 1.03370797   | 4.260534721 | 3.226826751 |
| <i>Lrmp</i>   | 0.000378625 | 1.167297449  | 4.557601329 | 3.390303881 |
| <i>Lrmp</i>   | 0.000402762 | 1.3597828    | 4.162068236 | 2.802285436 |
| <i>Lrp1b</i>  | 0.011291492 | 1.131379937  | 3.865989374 | 2.734609437 |
| <i>Lrrc36</i> | 0.001608246 | -1.014250554 | 4.254004965 | 5.268255519 |
| <i>Lrrc63</i> | 0.000902698 | -1.252655474 | 3.163973494 | 4.416628968 |
| <i>Lrriq3</i> | 0.030740968 | -1.047549606 | 2.41996216  | 3.467511766 |
| <i>Lrrtm4</i> | 3.53E-05    | 1.708341537  | 3.606147446 | 1.897805908 |
| <i>Lrrtm4</i> | 0.03036123  | 1.044099751  | 3.745518974 | 2.701419224 |
| <i>Lrtm2</i>  | 0.000283517 | -1.068584338 | 3.517668765 | 4.586253103 |
| <i>Lsamp</i>  | 5.29E-07    | -1.219512537 | 3.652740799 | 4.872253336 |
| <i>Lsp1</i>   | 2.23E-05    | 1.020923612  | 9.53209183  | 8.511168218 |
| <i>Lst1</i>   | 0.000251842 | 2.649770968  | 4.421858847 | 1.772087879 |
| <i>Lst1</i>   | 1.24E-06    | 2.569909557  | 4.399322868 | 1.829413311 |
| <i>Lst1</i>   | 1.13E-05    | 2.689391732  | 4.331364498 | 1.641972766 |
| <i>Lst1</i>   | 4.76E-06    | 3.009391433  | 4.464429714 | 1.455038281 |
| <i>Ltbp2</i>  | 0.02975679  | 1.241603301  | 6.455718665 | 5.214115364 |
| <i>Ltf</i>    | 0.000242196 | 1.179614581  | 5.858408589 | 4.678794008 |
| <i>Lum</i>    | 4.54E-05    | 1.165887793  | 8.188180289 | 7.022292496 |
| <i>Lvrn</i>   | 0.006109195 | 1.051538485  | 4.476723268 | 3.425184783 |
| <i>Lvrn</i>   | 0.03664221  | 1.290067031  | 3.597734427 | 2.307667396 |
| <i>Ly6a</i>   | 2.19E-05    | 1.859602361  | 14.23631695 | 12.37671459 |
| <i>Ly6a</i>   | 3.02E-05    | 1.863354513  | 14.30820634 | 12.44485182 |
| <i>Ly6a</i>   | 3.70E-06    | 1.82897689   | 14.20671318 | 12.37773629 |
| <i>Ly6a</i>   | 3.60E-06    | 1.904062646  | 14.13722637 | 12.23316373 |
| <i>Ly6a</i>   | 9.22E-06    | 1.843658354  | 14.15766863 | 12.31401028 |
| <i>Ly6a</i>   | 3.26E-06    | 1.888656335  | 14.22996158 | 12.34130525 |
| <i>Ly6c1</i>  | 0.001252157 | 1.401555115  | 5.642426424 | 4.24087131  |
| <i>Ly6c1</i>  | 1.62E-05    | 1.58142021   | 5.723706591 | 4.142286381 |
| <i>Ly6e</i>   | 4.70E-05    | 1.581848178  | 10.56399972 | 8.982151547 |
| <i>Ly6e</i>   | 0.000170382 | 1.493033178  | 10.72282189 | 9.229788716 |



|                 |             |              |             |             |
|-----------------|-------------|--------------|-------------|-------------|
| <i>Ly6e</i>     | 4.12E-05    | 1.636651893  | 10.77975694 | 9.143105046 |
| <i>Ly6e</i>     | 0.000105956 | 1.401007094  | 10.49278994 | 9.091782843 |
| <i>Ly6e</i>     | 0.000174664 | 1.44536453   | 10.55379729 | 9.108432761 |
| <i>Ly6e</i>     | 8.08E-05    | 1.299985237  | 10.43352218 | 9.133536943 |
| <i>Ly6f</i>     | 0.000124376 | 1.492606171  | 10.49258531 | 8.99997914  |
| <i>Ly6f</i>     | 0.000422723 | 1.392199167  | 10.55448812 | 9.162288955 |
| <i>Ly6g6e</i>   | 4.19E-05    | -1.040209387 | 6.750258464 | 7.790467851 |
| <i>Ly86</i>     | 8.74E-05    | 1.243285201  | 8.637219847 | 7.393934646 |
| <i>Ly9</i>      | 0.016181093 | 1.850723271  | 3.755742465 | 1.905019193 |
| <i>Ly9</i>      | 0.007231261 | 1.17031693   | 3.86730803  | 2.6969911   |
| <i>Lypd6b</i>   | 0.008512428 | -1.952291243 | 2.34452061  | 4.296811854 |
| <i>Lypd6b</i>   | 0.001591648 | -1.451601304 | 2.977700875 | 4.429302179 |
| <i>Lypd6b</i>   | 0.007129406 | -1.263139235 | 2.840475704 | 4.103614939 |
| <i>Lypd6b</i>   | 0.019552574 | -1.139506989 | 2.980078106 | 4.119585095 |
| <i>Lypd6b</i>   | 0.006096775 | -1.292680628 | 2.949764863 | 4.242445491 |
| <i>Lypd6b</i>   | 0.000179622 | -1.362075899 | 2.817788213 | 4.179864112 |
| <i>Lypd6b</i>   | 0.000561448 | -1.227023458 | 3.148537049 | 4.375560507 |
| <i>Lypd6b</i>   | 0.000880417 | -1.069820427 | 2.882281682 | 3.952102109 |
| <i>Lypd6b</i>   | 0.004487696 | -1.951043619 | 2.225113793 | 4.176157413 |
| <i>Lypd6b</i>   | 0.001386621 | -1.473303207 | 2.734272094 | 4.207575301 |
| <i>Lysmd2</i>   | 7.53E-06    | 1.032402068  | 7.193438608 | 6.161036541 |
| <i>M1ap</i>     | 0.000231415 | 1.097576091  | 6.113760038 | 5.016183947 |
| <i>Mafb</i>     | 2.53E-05    | 1.192674874  | 6.144124539 | 4.951449665 |
| <i>Mag</i>      | 0.001588256 | 1.001432367  | 6.305485658 | 5.304053291 |
| <i>Man2a2</i>   | 0.000937881 | 1.134806782  | 6.726414698 | 5.591607916 |
| <i>Man2a2</i>   | 0.000229173 | 1.111349731  | 6.848990059 | 5.737640328 |
| <i>Manf</i>     | 0.02568787  | 1.339255275  | 6.906413164 | 5.56715789  |
| <i>Map4k4</i>   | 0.000112484 | 1.142144183  | 6.16051219  | 5.018368007 |
| <i>Map4k4</i>   | 0.001573588 | 1.024724796  | 6.096911587 | 5.072186791 |
| <i>Map7d2</i>   | 0.001769842 | 1.172897356  | 5.452172681 | 4.279275325 |
| <i>Mapk15</i>   | 0.002901328 | -1.362533922 | 3.178466987 | 4.541000909 |
| <i>Mapkap1</i>  | 1.21E-06    | -1.220169241 | 4.256791644 | 5.476960885 |
| <i>Mapkapk3</i> | 0.00105085  | 1.820721778  | 4.713830357 | 2.893108579 |
| <i>Mapkapk3</i> | 0.001207952 | 2.203104522  | 4.634265745 | 2.431161223 |
| <i>Mapkapk3</i> | 0.00178091  | 1.943806407  | 4.766465054 | 2.822658647 |
| <i>Mapkapk3</i> | 0.000179053 | 1.429467895  | 4.609691746 | 3.180223851 |
| <i>Mapkapk3</i> | 0.000255895 | 1.646721547  | 4.644535641 | 2.997814094 |
| <i>Mapt</i>     | 0.003553884 | 1.072355448  | 9.788138482 | 8.715783035 |
| <i>March1</i>   | 0.00063224  | 2.090150493  | 4.800732497 | 2.710582003 |
| <i>March1</i>   | 0.000352739 | 1.274388391  | 4.618783687 | 3.344395296 |
| <i>March1</i>   | 0.000633952 | 2.484959218  | 4.749088254 | 2.264129037 |
| <i>March1</i>   | 0.000246074 | 1.901947542  | 4.675571114 | 2.773623573 |
| <i>March1</i>   | 0.00807941  | 1.140961696  | 4.351546505 | 3.210584809 |
| <i>March1</i>   | 0.001405128 | 1.594213199  | 4.665806723 | 3.071593524 |
| <i>March1</i>   | 0.007267339 | 1.942598238  | 4.489171827 | 2.54657359  |
| <i>March1</i>   | 2.29E-06    | 2.098104067  | 4.739377459 | 2.641273392 |

|                 |             |              |             |             |
|-----------------|-------------|--------------|-------------|-------------|
| <i>March1</i>   | 0.001111135 | 1.847811315  | 4.644307679 | 2.796496364 |
| <i>March1</i>   | 0.000257165 | 1.744241791  | 4.536124167 | 2.791882376 |
| <i>March1</i>   | 0.000401501 | 2.079735297  | 4.71205542  | 2.632320123 |
| <i>March3</i>   | 0.000100311 | -1.040091999 | 3.796791435 | 4.836883434 |
| <i>Marcks11</i> | 6.33E-06    | 1.609585951  | 10.03514028 | 8.425554324 |
| <i>Marcks11</i> | 3.72E-05    | 1.416565728  | 9.928424668 | 8.511858941 |
| <i>Mcemp1</i>   | 0.00569552  | 1.303374118  | 3.877576349 | 2.574202231 |
| <i>Mcm3</i>     | 0.001579533 | 1.729298787  | 3.494764826 | 1.765466039 |
| <i>Mcm6</i>     | 6.94E-05    | 1.001872701  | 6.842387076 | 5.840514375 |
| <i>Mcpt4</i>    | 0.000176268 | 1.011606545  | 8.144871134 | 7.133264589 |
| <i>Mctp1</i>    | 0.003953166 | 1.267655622  | 4.599546553 | 3.331890931 |
| <i>Mctp1</i>    | 0.002082133 | 1.365490651  | 4.303407914 | 2.937917263 |
| <i>Mctp1</i>    | 0.000330634 | 1.364361123  | 4.26004083  | 2.895679707 |
| <i>Mctp1</i>    | 0.001223501 | 1.502319655  | 4.354062322 | 2.851742667 |
| <i>Mctp1</i>    | 0.035158816 | 1.587020518  | 4.216274466 | 2.629253948 |
| <i>Mctp1</i>    | 0.001039668 | 1.145328272  | 4.234701088 | 3.089372816 |
| <i>Mctp1</i>    | 0.01410088  | 1.440329216  | 4.064495417 | 2.624166201 |
| <i>Mctp1</i>    | 0.003998119 | 1.105335204  | 4.266888381 | 3.161553177 |
| <i>Mctp1</i>    | 0.000752002 | 1.23347594   | 4.180933179 | 2.947457239 |
| <i>Mecom</i>    | 0.021742059 | 1.476885451  | 3.954743835 | 2.477858384 |
| <i>Mecom</i>    | 0.029163455 | 1.192546679  | 4.359145617 | 3.166598938 |
| <i>Mecom</i>    | 0.010359788 | 1.693494419  | 3.897781506 | 2.204287087 |
| <i>Megf6</i>    | 0.029460786 | -1.148306066 | 3.625571763 | 4.773877829 |
| <i>Megf6</i>    | 0.012425318 | -1.054525578 | 3.848681057 | 4.903206635 |
| <i>Meig1</i>    | 3.53E-06    | -2.255170314 | 3.946929432 | 6.202099746 |
| <i>Meig1</i>    | 8.71E-05    | -2.434763996 | 3.774918605 | 6.2096826   |
| <i>Metrn</i>    | 0.000728499 | -1.67981117  | 3.766831868 | 5.446643039 |
| <i>Mfap2</i>    | 2.15E-06    | 1.297732926  | 6.683391476 | 5.38565855  |
| <i>Mfap2</i>    | 1.61E-05    | 1.228883401  | 6.483603074 | 5.254719672 |
| <i>Mfap2</i>    | 0.000538668 | 1.636691419  | 6.793922712 | 5.157231292 |
| <i>Mfap2</i>    | 0.000218015 | 1.140770427  | 6.559053385 | 5.418282959 |
| <i>Mfap2</i>    | 0.000449722 | 1.287320017  | 6.576313786 | 5.288993769 |
| <i>Mfge8</i>    | 1.04E-06    | 1.230489902  | 9.301560476 | 8.071070574 |
| <i>Mfge8</i>    | 1.80E-05    | 1.225902827  | 9.110201443 | 7.884298616 |
| <i>Mgst2</i>    | 0.005505925 | -1.043806349 | 5.420478289 | 6.464284638 |
| <i>Mia2</i>     | 0.010206834 | 1.057674893  | 3.754976755 | 2.697301863 |
| <i>Mid1</i>     | 3.37E-06    | 1.045980266  | 9.732865023 | 8.686884756 |
| <i>Miip</i>     | 5.12E-07    | 1.662290977  | 9.844444778 | 8.182153801 |
| <i>Miip</i>     | 6.21E-06    | 1.218135865  | 9.931513386 | 8.713377521 |
| <i>Miip</i>     | 2.77E-05    | 1.090368543  | 9.985354878 | 8.894986335 |
| <i>Misp</i>     | 0.002807873 | 1.133348647  | 3.705285737 | 2.57193709  |
| <i>Misp</i>     | 0.014307798 | 1.205734195  | 3.409538117 | 2.203803922 |
| <i>Mixl1</i>    | 0.042474677 | -1.131818087 | 2.163053928 | 3.294872016 |
| <i>Mki67</i>    | 8.14E-05    | 1.796669751  | 7.081541654 | 5.284871903 |
| <i>Mki67</i>    | 3.91E-06    | 1.712680937  | 6.917249469 | 5.204568533 |
| <i>Mki67</i>    | 0.000152104 | 1.527666781  | 6.867458364 | 5.339791583 |

|                |             |              |             |             |
|----------------|-------------|--------------|-------------|-------------|
| <i>Mki67</i>   | 0.000234269 | 1.694620166  | 6.684609065 | 4.989988898 |
| <i>Mlxipl</i>  | 0.000161317 | 1.094827396  | 5.584567232 | 4.489739836 |
| <i>Mmp12</i>   | 0.003986382 | 4.185478643  | 7.954849165 | 3.769370522 |
| <i>Mmp12</i>   | 0.0030485   | 4.771158874  | 7.811340646 | 3.040181772 |
| <i>Mmp12</i>   | 0.006353976 | 4.009805587  | 7.815121381 | 3.805315794 |
| <i>Mmp12</i>   | 0.0056893   | 4.949297293  | 7.906347885 | 2.957050593 |
| <i>Mmp14</i>   | 2.99E-05    | 1.063045916  | 7.531977936 | 6.46893202  |
| <i>Mmp2</i>    | 0.000153268 | 1.420528341  | 8.41416778  | 6.993639439 |
| <i>Mmp7</i>    | 2.44E-08    | 1.84808165   | 13.62707502 | 11.77899337 |
| <i>Mmp7</i>    | 6.61E-07    | 1.582570774  | 13.26567144 | 11.68310066 |
| <i>Mnda</i>    | 0.000230614 | 1.15501295   | 9.326163182 | 8.171150233 |
| <i>Mndal</i>   | 0.000339404 | 2.17206535   | 4.671974381 | 2.499909031 |
| <i>Mpeg1</i>   | 1.04E-06    | 2.586083281  | 7.457747679 | 4.871664397 |
| <i>Mpeg1</i>   | 4.66E-06    | 2.553997004  | 7.244492963 | 4.690495959 |
| <i>Mpped1</i>  | 0.001728782 | -1.259123168 | 5.821721029 | 7.080844197 |
| <i>Mpzl2</i>   | 7.66E-06    | 2.44783477   | 7.318144788 | 4.870310019 |
| <i>Mpzl2</i>   | 4.94E-07    | 2.345577546  | 7.544182009 | 5.198604463 |
| <i>Mpzl2</i>   | 1.87E-05    | 2.304069443  | 7.369625525 | 5.065556082 |
| <i>Mrap2</i>   | 0.000200152 | -1.207511965 | 6.662879833 | 7.870391798 |
| <i>Mrap2</i>   | 0.001514133 | -1.076077293 | 6.725578598 | 7.801655891 |
| <i>Mrc2</i>    | 0.000231646 | 1.161240261  | 7.442395784 | 6.281155523 |
| <i>Mrgpra1</i> | 0.03792755  | -1.504947517 | 2.422198519 | 3.927146037 |
| <i>Mro</i>     | 0.008073518 | -1.266916766 | 2.537540767 | 3.804457533 |
| <i>Mroh4</i>   | 0.027456937 | -1.007828417 | 3.019635386 | 4.027463803 |
| <i>Ms4a4a</i>  | 0.00020163  | 2.453975353  | 5.405675323 | 2.951699969 |
| <i>Ms4a4b</i>  | 0.00095768  | 2.441863331  | 5.12414709  | 2.682283759 |
| <i>Ms4a5</i>   | 0.013143188 | -1.14329205  | 2.105344615 | 3.248636665 |
| <i>Ms4a6b</i>  | 1.40E-05    | 2.009352189  | 6.003358458 | 3.994006269 |
| <i>Ms4a6c</i>  | 2.02E-05    | 2.587277354  | 6.503519562 | 3.916242208 |
| <i>Ms4a6c</i>  | 3.43E-06    | 1.858682526  | 6.287071311 | 4.428388784 |
| <i>Ms4a6c</i>  | 3.16E-06    | 2.285040928  | 6.69346855  | 4.408427622 |
| <i>Ms4a6d</i>  | 2.44E-05    | 2.078624581  | 6.670965021 | 4.59234044  |
| <i>Msh5</i>    | 0.001927036 | -2.013620085 | 1.798902632 | 3.812522717 |
| <i>Msln</i>    | 7.72E-07    | 1.645094397  | 9.631903452 | 7.986809054 |
| <i>Msln</i>    | 2.56E-06    | 1.65899857   | 9.632791518 | 7.973792948 |
| <i>Msln</i>    | 9.91E-07    | 1.639958295  | 9.615393335 | 7.97543504  |
| <i>Msn</i>     | 2.89E-07    | 1.030683845  | 8.637226037 | 7.606542193 |
| <i>Msr1</i>    | 0.002687883 | 1.286310621  | 4.650528709 | 3.364218088 |
| <i>Msr1</i>    | 0.014081278 | 1.772840383  | 4.496097262 | 2.723256878 |
| <i>Msr1</i>    | 3.48E-05    | 2.36151252   | 4.634183149 | 2.272670629 |
| <i>Mthfd1l</i> | 2.11E-06    | 1.47282032   | 8.215466113 | 6.742645792 |
| <i>Mtl5</i>    | 0.025520867 | 1.319818796  | 4.089586043 | 2.769767247 |
| <i>Mto1</i>    | 0.004766635 | 1.081063973  | 6.913783636 | 5.832719663 |
| <i>Mto1</i>    | 2.84E-05    | 1.776066497  | 6.774531707 | 4.998465211 |
| <i>Mtpap</i>   | 0.000168133 | 1.004663988  | 6.607469184 | 5.602805197 |
| <i>Muc1</i>    | 3.05E-05    | 1.99538495   | 6.023811958 | 4.028427008 |

|               |             |              |             |             |
|---------------|-------------|--------------|-------------|-------------|
| <i>Muc16</i>  | 0.007482856 | 1.175016544  | 4.464293636 | 3.289277092 |
| <i>Muc3</i>   | 0.021019163 | 1.195103209  | 4.15629653  | 2.961193321 |
| <i>Mum111</i> | 0.004378461 | 1.221888602  | 4.477323455 | 3.255434853 |
| <i>Mum111</i> | 0.020822028 | 1.246490714  | 4.538984813 | 3.292494098 |
| <i>Mup21</i>  | 0.006199961 | -1.015968449 | 2.695209336 | 3.711177785 |
| <i>Mvb12b</i> | 0.000305628 | -1.077121602 | 6.226427748 | 7.30354935  |
| <i>Mvb12b</i> | 0.0002634   | -1.141242317 | 6.077745538 | 7.218987856 |
| <i>Mvb12b</i> | 0.00068855  | -1.206232473 | 5.939035008 | 7.145267481 |
| <i>Myb</i>    | 0.003547755 | -2.228087355 | 9.408337564 | 11.63642492 |
| <i>Myb</i>    | 0.029188195 | -1.797785134 | 9.855186626 | 11.65297176 |
| <i>Myh10</i>  | 5.23E-08    | -1.453474743 | 6.524202281 | 7.977677024 |
| <i>Myh10</i>  | 5.39E-06    | -1.376032724 | 6.547786569 | 7.923819293 |
| <i>Myh10</i>  | 1.26E-07    | -1.389464608 | 6.548439231 | 7.93790384  |
| <i>Myh10</i>  | 6.23E-06    | -1.277076788 | 6.678663405 | 7.955740193 |
| <i>Myh7</i>   | 8.95E-07    | -2.315931192 | 5.323034496 | 7.638965688 |
| <i>Myh7</i>   | 2.40E-07    | -2.051734497 | 5.583301882 | 7.635036379 |
| <i>Myh7</i>   | 1.33E-07    | -2.259764219 | 5.265025096 | 7.524789315 |
| <i>Myh7b</i>  | 0.011385963 | -1.835554312 | 4.411082812 | 6.246637123 |
| <i>Myh7b</i>  | 6.58E-07    | 1.198456294  | 6.82907205  | 5.630615756 |
| <i>Myo15</i>  | 0.000209256 | -1.448820996 | 4.337170242 | 5.785991237 |
| <i>Myo15</i>  | 1.32E-05    | -1.676142332 | 4.172840719 | 5.848983051 |
| <i>Myo19</i>  | 9.57E-07    | 1.112979492  | 8.780866871 | 7.667887379 |
| <i>Myo1b</i>  | 0.046953921 | 1.429467327  | 5.615837108 | 4.18636978  |
| <i>Myo1b</i>  | 0.030836729 | 1.594317153  | 5.865121572 | 4.27080442  |
| <i>Myo1b</i>  | 0.035397251 | 1.432306835  | 5.632903881 | 4.200597046 |
| <i>Myo1b</i>  | 0.04318128  | 1.384007874  | 5.693718472 | 4.309710598 |
| <i>Myo1f</i>  | 1.50E-05    | 1.761261625  | 5.185773144 | 3.424511519 |
| <i>Myo1g</i>  | 7.47E-05    | 1.324726116  | 5.532504099 | 4.207777983 |
| <i>Myo1g</i>  | 3.17E-05    | 1.971593569  | 5.267067731 | 3.295474161 |
| <i>Myo1g</i>  | 0.000497859 | 1.676501401  | 5.279593885 | 3.603092484 |
| <i>Myod1</i>  | 0.000575929 | 1.283199561  | 7.175512548 | 5.892312987 |
| <i>Myof</i>   | 6.30E-06    | 1.447573253  | 7.301313086 | 5.853739832 |
| <i>Myof</i>   | 8.42E-06    | 1.157303046  | 7.137211431 | 5.979908385 |
| <i>Myof</i>   | 3.78E-06    | 1.387045516  | 7.021911401 | 5.634865886 |
| <i>Myof</i>   | 1.75E-05    | 1.243861312  | 7.077734389 | 5.833873077 |
| <i>Myrf</i>   | 0.02864426  | 1.630581637  | 3.632805979 | 2.002224342 |
| <i>Myt11</i>  | 0.008668872 | -1.434152394 | 3.009722035 | 4.443874429 |
| <i>Mzb1</i>   | 0.001061341 | 1.167225654  | 5.179266689 | 4.012041035 |
| <i>N4bp1</i>  | 0.020811866 | -1.604193634 | 2.504721076 | 4.10891471  |
| <i>Nav1</i>   | 1.09E-07    | 1.102295739  | 7.587459742 | 6.485164004 |
| <i>Nav3</i>   | 0.016159728 | 1.076919491  | 3.588236446 | 2.511316954 |
| <i>Ncapd2</i> | 0.000127019 | 1.123378568  | 4.246927459 | 3.123548891 |
| <i>Ncapg</i>  | 0.00041442  | 1.595793222  | 3.871118115 | 2.275324893 |
| <i>Ncaph</i>  | 0.000251255 | 1.299756541  | 5.732647519 | 4.432890978 |
| <i>Ncf1</i>   | 1.11E-05    | 1.650658336  | 6.756382992 | 5.105724656 |
| <i>Ncf1</i>   | 6.85E-07    | 1.660783619  | 6.583555257 | 4.922771638 |

|                |             |              |             |             |
|----------------|-------------|--------------|-------------|-------------|
| <i>Ncf2</i>    | 0.000714728 | 1.248288046  | 4.847222348 | 3.598934302 |
| <i>Ncf4</i>    | 7.11E-06    | 1.289355792  | 7.749865247 | 6.460509456 |
| <i>Ncf4</i>    | 6.63E-06    | 1.252513791  | 7.770255301 | 6.51774151  |
| <i>Ncf4</i>    | 7.93E-06    | 1.571931238  | 7.97993101  | 6.407999772 |
| <i>Ncf4</i>    | 0.000749769 | 1.038312092  | 6.418709415 | 5.380397323 |
| <i>Nckap1l</i> | 0.000626384 | 1.275102035  | 5.897443723 | 4.622341688 |
| <i>Nckap1l</i> | 0.000284125 | 1.774789223  | 6.013802197 | 4.239012974 |
| <i>Ndufaf6</i> | 0.010467253 | -1.010852809 | 5.646774181 | 6.65762699  |
| <i>Ndufaf7</i> | 0.002213996 | -1.996690093 | 1.778377007 | 3.775067101 |
| <i>Ndufs7</i>  | 0.011737327 | -1.444972661 | 3.362889518 | 4.807862179 |
| <i>Neb</i>     | 0.019097776 | 1.48683107   | 4.247296968 | 2.760465897 |
| <i>Neb</i>     | 0.012709362 | 1.012977629  | 4.077905072 | 3.064927443 |
| <i>Neb</i>     | 0.021435339 | 1.014432915  | 3.892912063 | 2.878479149 |
| <i>Nebi</i>    | 0.012479361 | 2.607440118  | 5.693241479 | 3.085801361 |
| <i>Nebi</i>    | 0.006546665 | 1.711341113  | 5.067327527 | 3.355986414 |
| <i>Nebi</i>    | 3.54E-05    | 1.755637386  | 5.191102954 | 3.435465568 |
| <i>Nedd9</i>   | 0.001500602 | 1.178303346  | 4.212192627 | 3.033889281 |
| <i>Nedd9</i>   | 0.000626283 | 1.180736764  | 4.165148076 | 2.984411312 |
| <i>Nefh</i>    | 0.000888001 | 5.667948244  | 7.685794266 | 2.017846021 |
| <i>Neil3</i>   | 0.021239987 | 1.285950725  | 3.469507109 | 2.183556384 |
| <i>Nek11</i>   | 0.044041768 | -1.083755608 | 2.472748701 | 3.556504309 |
| <i>Nek2</i>    | 0.037001588 | 1.171139524  | 4.301404155 | 3.130264631 |
| <i>Nek2</i>    | 0.013708616 | 1.106641466  | 4.287121266 | 3.1804798   |
| <i>Nek2</i>    | 0.008699924 | 1.795271765  | 4.565103489 | 2.769831723 |
| <i>Nek6</i>    | 0.000110362 | 1.12621157   | 6.533353763 | 5.407142193 |
| <i>Net1</i>    | 0.000324139 | 1.071877895  | 10.2078688  | 9.135990908 |
| <i>Net1</i>    | 0.000203339 | 1.181478211  | 10.27968155 | 9.098203336 |
| <i>Neu1</i>    | 0.00762604  | -1.266014681 | 2.291566917 | 3.557581598 |
| <i>Neu1</i>    | 0.006055371 | -1.925803144 | 1.888941293 | 3.814744436 |
| <i>Neu1</i>    | 0.014794519 | -1.171185855 | 2.294897234 | 3.466083088 |
| <i>Neu2</i>    | 0.001751258 | -1.030419826 | 5.127078997 | 6.157498823 |
| <i>Neu2</i>    | 0.002121427 | -1.058231878 | 5.101166601 | 6.159398479 |
| <i>Neurl3</i>  | 2.09E-06    | 2.567265927  | 6.418690758 | 3.851424831 |
| <i>Neurod4</i> | 0.007391653 | -1.016157279 | 4.387215366 | 5.403372645 |
| <i>Nfam1</i>   | 0.004585383 | 1.141794785  | 4.171561226 | 3.029766441 |
| <i>Nfam1</i>   | 0.02152521  | 1.390082113  | 4.072298503 | 2.682216389 |
| <i>Nfam1</i>   | 9.19E-06    | 2.029538736  | 4.219498287 | 2.189959551 |
| <i>Nfam1</i>   | 3.12E-05    | 1.917203139  | 3.971603683 | 2.054400544 |
| <i>Nfam1</i>   | 0.021116763 | 1.595765844  | 4.197492229 | 2.601726384 |
| <i>Nfatc2</i>  | 0.000185369 | -1.157111347 | 4.948134069 | 6.105245416 |
| <i>Nfkbib</i>  | 0.005387024 | -1.157014578 | 2.796709829 | 3.953724407 |
| <i>Nfkbid</i>  | 0.000109406 | 2.189594349  | 3.781563036 | 1.591968687 |
| <i>Nfkbid</i>  | 0.000636242 | 2.001747281  | 3.885683601 | 1.88393632  |
| <i>Nfkbid</i>  | 0.000626827 | 2.433478413  | 3.616076909 | 1.182598496 |
| <i>Nfkbiz</i>  | 0.000182735 | 1.04287227   | 7.19163896  | 6.148766691 |
| <i>Nid2</i>    | 0.00019328  | 1.011053036  | 4.978248492 | 3.967195456 |

|               |             |              |             |             |
|---------------|-------------|--------------|-------------|-------------|
| <i>Nipa14</i> | 6.79E-05    | 1.662465687  | 3.516950448 | 1.854484761 |
| <i>Nkx2-6</i> | 0.000358753 | -1.002572306 | 4.198032919 | 5.200605225 |
| <i>Nlrc5</i>  | 0.000365351 | 2.231101305  | 5.181289172 | 2.950187866 |
| <i>Nlrc5</i>  | 0.000280189 | 1.832508864  | 5.262650834 | 3.430141969 |
| <i>Nlrc5</i>  | 6.04E-05    | 2.509307903  | 5.460885783 | 2.95157788  |
| <i>Nlrc5</i>  | 0.000185373 | 1.715906439  | 5.005136719 | 3.28923028  |
| <i>Nlrc5</i>  | 0.000774311 | 1.7644491    | 5.282357102 | 3.517908002 |
| <i>Nlrc5</i>  | 0.000337404 | 2.197280072  | 5.221751155 | 3.024471084 |
| <i>Nlrp10</i> | 2.13E-05    | 1.608086728  | 8.76574862  | 7.157661892 |
| <i>Nlrp1a</i> | 4.17E-05    | 1.140481395  | 6.236633191 | 5.096151797 |
| <i>Nlrp4e</i> | 0.002476507 | -1.324267048 | 3.381486742 | 4.70575379  |
| <i>Nos1ap</i> | 0.002775456 | -1.171141569 | 4.685854422 | 5.856995992 |
| <i>Nos2</i>   | 9.35E-08    | 5.389259551  | 6.378949469 | 0.989689918 |
| <i>Nos2</i>   | 1.81E-07    | 5.164343548  | 6.526123313 | 1.361779765 |
| <i>Nos2</i>   | 5.81E-07    | 5.340683258  | 6.422447725 | 1.081764467 |
| <i>Nos2</i>   | 2.56E-08    | 5.251692729  | 6.441950756 | 1.190258027 |
| <i>Nova1</i>  | 0.006476433 | 1.492053817  | 6.351985443 | 4.859931627 |
| <i>Nova1</i>  | 0.001700468 | 1.315401605  | 7.687319139 | 6.371917534 |
| <i>Npnt</i>   | 0.006869023 | 1.363955027  | 4.954469645 | 3.590514619 |
| <i>Npnt</i>   | 0.001959053 | 1.160404514  | 4.987264599 | 3.826860085 |
| <i>Npnt</i>   | 0.01052019  | 1.028014171  | 4.814986492 | 3.78697232  |
| <i>Npnt</i>   | 0.000686723 | 1.497408629  | 4.92606094  | 3.428652311 |
| <i>Npsr1</i>  | 0.009082989 | 1.649195877  | 3.348060444 | 1.698864567 |
| <i>Npsr1</i>  | 0.027789439 | 1.167570697  | 3.539267061 | 2.371696364 |
| <i>Npy</i>    | 0.001173316 | 1.86435049   | 7.612460187 | 5.748109697 |
| <i>Npy2r</i>  | 0.036123173 | -1.478810518 | 1.983553013 | 3.462363532 |
| <i>Nr2f1</i>  | 3.42E-06    | 1.611020204  | 8.898347423 | 7.28732722  |
| <i>Nr4a3</i>  | 0.00825129  | 1.37180942   | 6.967058066 | 5.595248646 |
| <i>Nr4a3</i>  | 0.00080707  | 3.435581428  | 5.195981492 | 1.760400064 |
| <i>Nr4a3</i>  | 0.000572173 | 3.532990323  | 5.219311539 | 1.686321217 |
| <i>Nr4a3</i>  | 0.006128236 | 2.539866378  | 5.238021183 | 2.698154805 |
| <i>Nr4a3</i>  | 0.00127439  | 3.075451494  | 5.037419046 | 1.961967552 |
| <i>Nrgn</i>   | 0.001613935 | 1.713153371  | 3.718170676 | 2.005017305 |
| <i>Nrros</i>  | 0.00015482  | 1.115400715  | 5.518061845 | 4.40266113  |
| <i>Nrros</i>  | 9.75E-08    | 1.212877115  | 5.903368147 | 4.690491032 |
| <i>Nrros</i>  | 0.000858727 | 1.463834402  | 5.639508912 | 4.17567451  |
| <i>Nrros</i>  | 1.77E-06    | 1.188412281  | 5.635291421 | 4.44687914  |
| <i>Nrros</i>  | 9.20E-06    | 1.121511602  | 5.851710241 | 4.730198639 |
| <i>Nrxn3</i>  | 0.000237242 | 1.341210898  | 5.84390525  | 4.502694352 |
| <i>Nrxn3</i>  | 6.40E-06    | 1.403495248  | 5.911675795 | 4.508180547 |
| <i>Nrxn3</i>  | 0.000179717 | 1.690463644  | 6.064305889 | 4.373842245 |
| <i>Nrxn3</i>  | 0.00014157  | 1.212382128  | 6.091850212 | 4.879468084 |
| <i>Nsun7</i>  | 0.021491053 | 1.254865634  | 4.806287243 | 3.551421609 |
| <i>Nsun7</i>  | 0.02500362  | 1.354748708  | 4.723878908 | 3.3691302   |
| <i>Nt5dc2</i> | 0.005394569 | 1.574676071  | 3.795716405 | 2.221040334 |
| <i>Ntng1</i>  | 0.005232955 | 1.057685361  | 4.206792507 | 3.149107146 |

|                |             |              |             |             |
|----------------|-------------|--------------|-------------|-------------|
| <i>Nucb2</i>   | 0.000312461 | 1.481478983  | 5.204335088 | 3.722856104 |
| <i>Nucb2</i>   | 5.14E-06    | 1.664667291  | 5.016349182 | 3.351681892 |
| <i>Nuf2</i>    | 0.003810832 | 1.430425123  | 4.200486414 | 2.770061291 |
| <i>Nuf2</i>    | 0.001120209 | 2.23436007   | 4.137900149 | 1.903540079 |
| <i>Nupl2</i>   | 2.82E-06    | -1.049102902 | 6.713557839 | 7.762660741 |
| <i>Nupr1</i>   | 0.000433169 | 1.519017912  | 7.906075262 | 6.38705735  |
| <i>Nusap1</i>  | 0.00044317  | 1.369788404  | 5.339887879 | 3.970099475 |
| <i>Nxph2</i>   | 0.003495444 | 1.296159284  | 8.738713539 | 7.442554255 |
| <i>Nxph2</i>   | 0.00622974  | 1.186514631  | 8.752893002 | 7.566378371 |
| <i>Nyx</i>     | 0.017746726 | -1.495605482 | 1.884895143 | 3.380500624 |
| <i>Nyx</i>     | 3.28E-05    | -1.179848329 | 5.712150447 | 6.891998776 |
| <i>Oas2</i>    | 0.00018962  | 1.283825913  | 8.770305089 | 7.486479176 |
| <i>Oas2</i>    | 0.000155122 | 1.247561591  | 8.726656218 | 7.479094627 |
| <i>Oasl1</i>   | 0.002011368 | 1.301369467  | 5.55132746  | 4.249957993 |
| <i>Oasl1</i>   | 0.000232277 | 1.45634822   | 5.397754534 | 3.941406314 |
| <i>Oaz3</i>    | 1.88E-05    | -1.429529849 | 3.942107796 | 5.371637645 |
| <i>Odf4</i>    | 0.000552074 | -1.634524464 | 2.223445086 | 3.85796955  |
| <i>Odf4</i>    | 0.002106283 | -1.37392052  | 2.691546828 | 4.065467348 |
| <i>Olfm4</i>   | 1.76E-05    | 2.897871232  | 10.58093583 | 7.683064598 |
| <i>Olfm4</i>   | 1.49E-05    | 2.759127315  | 10.47465332 | 7.715526007 |
| <i>Olf1097</i> | 0.000106084 | 1.073073955  | 7.479640532 | 6.406566578 |
| <i>Olf1176</i> | 7.32E-05    | -1.06111871  | 4.192786045 | 5.253904755 |
| <i>Olf1218</i> | 6.33E-06    | -1.037014788 | 3.988304734 | 5.025319523 |
| <i>Olf1238</i> | 0.000680359 | 1.274876936  | 4.297867697 | 3.02299076  |
| <i>Olf124</i>  | 0.005470141 | -1.072707212 | 3.195139972 | 4.267847184 |
| <i>Olf1241</i> | 0.010979179 | -1.246045005 | 2.484698108 | 3.730743113 |
| <i>Olf1264</i> | 0.001785807 | -1.699118743 | 2.404889149 | 4.104007893 |
| <i>Olf131</i>  | 0.018852999 | 1.112927561  | 3.891687625 | 2.778760064 |
| <i>Olf136</i>  | 0.009530685 | 1.749591217  | 3.594326609 | 1.844735393 |
| <i>Olf1361</i> | 7.80E-05    | -1.001146404 | 8.440451803 | 9.441598207 |
| <i>Olf1361</i> | 0.000140754 | -1.02991131  | 8.502505634 | 9.532416944 |
| <i>Olf1396</i> | 0.013593053 | 1.03607264   | 4.474951683 | 3.438879043 |
| <i>Olf1500</i> | 0.014866114 | -1.25739986  | 2.722430527 | 3.979830387 |
| <i>Olf224</i>  | 0.023023957 | -1.226285381 | 2.530800622 | 3.757086003 |
| <i>Olf286</i>  | 5.32E-07    | -1.483126846 | 3.504488121 | 4.987614967 |
| <i>Olf295</i>  | 3.02E-05    | -1.339883924 | 5.31689938  | 6.656783304 |
| <i>Olf295</i>  | 0.000351043 | -1.788149651 | 5.059958381 | 6.848108032 |
| <i>Olf338</i>  | 0.000410227 | -1.369579788 | 4.201578753 | 5.571158541 |
| <i>Olf392</i>  | 0.044319933 | -1.135690792 | 1.917558044 | 3.053248836 |
| <i>Olf393</i>  | 0.005364732 | -1.03436529  | 4.095365689 | 5.129730979 |
| <i>Olf394</i>  | 0.011644738 | -1.480862932 | 2.175595694 | 3.656458626 |
| <i>Olf418</i>  | 0.003051698 | -1.877764307 | 1.574213342 | 3.451977649 |
| <i>Olf472</i>  | 0.000638357 | -1.048851016 | 4.427908235 | 5.476759251 |
| <i>Olf494</i>  | 3.05E-06    | -1.087477525 | 4.364859194 | 5.452336719 |
| <i>Olf510</i>  | 0.002777544 | 1.266758498  | 6.494888177 | 5.228129679 |
| <i>Olf510</i>  | 0.007324515 | 1.006832056  | 6.264556936 | 5.25772488  |

|                |             |              |             |             |
|----------------|-------------|--------------|-------------|-------------|
| <i>Olfr556</i> | 0.006913704 | -1.003638518 | 2.636846218 | 3.640484736 |
| <i>Olfr711</i> | 1.70E-05    | 1.188788728  | 11.40706831 | 10.21827958 |
| <i>Olfr828</i> | 6.52E-06    | 1.169371192  | 7.964448294 | 6.795077102 |
| <i>Olfr887</i> | 3.90E-07    | -1.562263023 | 6.784433352 | 8.346696375 |
| <i>Olfr93</i>  | 0.017548295 | -1.973232816 | 2.257468187 | 4.230701003 |
| <i>Olfr965</i> | 0.030594699 | -1.350153384 | 1.961968077 | 3.312121461 |
| <i>Oma1</i>    | 0.001009283 | -1.003824623 | 3.172214188 | 4.176038811 |
| <i>Oprm1</i>   | 0.015007547 | -1.082612227 | 2.50044039  | 3.583052618 |
| <i>Oprm1</i>   | 0.041787106 | -1.477787176 | 2.235805427 | 3.713592603 |
| <i>Oprm1</i>   | 0.030528523 | -1.06813493  | 2.388109917 | 3.456244847 |
| <i>Optc</i>    | 0.001927894 | 1.033863543  | 3.220447631 | 2.186584088 |
| <i>Osmr</i>    | 5.69E-05    | 1.368583267  | 7.06677595  | 5.698192683 |
| <i>Osmr</i>    | 3.09E-05    | 1.320552863  | 7.176055508 | 5.855502645 |
| <i>Osmr</i>    | 6.30E-06    | 1.443674655  | 7.051099752 | 5.607425097 |
| <i>Osmr</i>    | 4.83E-06    | 1.347643735  | 7.03142118  | 5.683777444 |
| <i>Osmr</i>    | 5.79E-06    | 1.667224495  | 7.347111544 | 5.679887049 |
| <i>Otogl</i>   | 2.12E-05    | 1.394797613  | 6.427599321 | 5.032801708 |
| <i>Otx2</i>    | 0.048842851 | 1.15932247   | 3.970941686 | 2.811619216 |
| <i>Oxsm</i>    | 0.025576123 | 1.427284085  | 3.699112738 | 2.271828654 |
| <i>Oxtr</i>    | 0.021643827 | 1.358434935  | 4.070953515 | 2.71251858  |
| <i>Oxtr</i>    | 0.033458277 | 1.373443     | 4.155159693 | 2.781716693 |
| <i>P2rx5</i>   | 2.69E-06    | 1.103047978  | 9.224262069 | 8.121214091 |
| <i>P2ry14</i>  | 0.000117647 | 1.345162535  | 6.983774359 | 5.638611825 |
| <i>P2ry14</i>  | 0.000114776 | 1.735917374  | 6.185356708 | 4.449439335 |
| <i>P2ry14</i>  | 0.005564946 | 1.5097755    | 6.931352519 | 5.421577019 |
| <i>P2ry14</i>  | 0.001565977 | 1.633143244  | 6.947170536 | 5.314027292 |
| <i>P2ry14</i>  | 0.002491208 | 1.737050041  | 6.89384474  | 5.156794699 |
| <i>P2ry14</i>  | 0.004228128 | 1.261581166  | 6.692134673 | 5.430553506 |
| <i>Padi4</i>   | 0.029252693 | 1.109668607  | 3.699568196 | 2.58989959  |
| <i>Pak3</i>    | 0.015708327 | 1.595307708  | 3.628477352 | 2.033169644 |
| <i>Papd7</i>   | 3.16E-06    | 1.500148573  | 8.243732247 | 6.743583675 |
| <i>Paqr5</i>   | 6.01E-06    | -1.30141083  | 5.197708481 | 6.499119311 |
| <i>Paqr5</i>   | 6.81E-06    | -1.258588682 | 5.217019399 | 6.475608082 |
| <i>Paqr5</i>   | 6.30E-07    | -1.202720374 | 5.278584935 | 6.481305308 |
| <i>Paqr5</i>   | 2.65E-05    | -1.350612331 | 5.115867834 | 6.466480165 |
| <i>Parp14</i>  | 2.77E-05    | 1.191666957  | 6.673792906 | 5.482125949 |
| <i>Parp14</i>  | 0.000224621 | 1.182633443  | 6.61269472  | 5.430061277 |
| <i>Parvg</i>   | 0.000281738 | 1.539657649  | 4.862629132 | 3.322971483 |
| <i>Parvg</i>   | 5.47E-05    | 1.345148999  | 4.841695572 | 3.496546573 |
| <i>Parvg</i>   | 0.000457477 | 1.278964389  | 4.959565543 | 3.680601155 |
| <i>Pask</i>    | 0.001439443 | 1.154740687  | 4.192414661 | 3.037673975 |
| <i>Pask</i>    | 0.017359867 | 1.119324543  | 4.416481667 | 3.297157124 |
| <i>Pate4</i>   | 0.000241352 | 6.102382766  | 12.43996746 | 6.337584698 |
| <i>Pax9</i>    | 0.001802709 | -1.278738139 | 3.16642633  | 4.44516447  |
| <i>Pbk</i>     | 8.71E-05    | 1.686642453  | 4.704673406 | 3.018030954 |
| <i>Pbk</i>     | 0.00012044  | 1.319791295  | 4.683203252 | 3.363411957 |



|                 |             |              |             |             |
|-----------------|-------------|--------------|-------------|-------------|
| <i>Pbx4</i>     | 1.82E-05    | -1.460086653 | 4.581475467 | 6.04156212  |
| <i>Pbx4</i>     | 1.04E-05    | -1.47785816  | 4.487034134 | 5.964892294 |
| <i>Pbx4</i>     | 0.000274857 | -1.430226384 | 4.628953878 | 6.059180262 |
| <i>Pbx4</i>     | 0.000342516 | -1.255537355 | 4.624897416 | 5.880434771 |
| <i>Pcdh11x</i>  | 0.029632725 | -1.158585763 | 4.080869402 | 5.239455165 |
| <i>Pcdhb18</i>  | 0.020494741 | 1.128104475  | 3.830409008 | 2.702304533 |
| <i>Pcdhgc4</i>  | 0.000224524 | -1.023602869 | 4.211916104 | 5.235518973 |
| <i>Pcgf2</i>    | 2.73E-06    | 1.562334588  | 11.7752813  | 10.21294672 |
| <i>Pcsk5</i>    | 5.47E-05    | 1.695316036  | 7.622698147 | 5.927382111 |
| <i>Pcsk5</i>    | 9.45E-05    | 1.42502105   | 7.189200088 | 5.764179038 |
| <i>Pcsk5</i>    | 0.000110888 | 1.499958426  | 7.216108885 | 5.716150459 |
| <i>Pcsk5</i>    | 0.000417084 | 1.373758243  | 7.129264724 | 5.755506481 |
| <i>Pcsk5</i>    | 0.000205945 | 1.22351864   | 7.088873884 | 5.865355244 |
| <i>Pcsk5</i>    | 0.000171563 | 1.497724731  | 7.283542859 | 5.785818128 |
| <i>Pcsk9</i>    | 0.000309836 | -1.186107938 | 5.892821    | 7.078928937 |
| <i>Pde9a</i>    | 0.000215329 | -1.041347419 | 6.091918373 | 7.133265793 |
| <i>Pde9a</i>    | 0.002192525 | -1.056282002 | 6.180510895 | 7.236792897 |
| <i>Pdia2</i>    | 0.000844197 | 1.271660037  | 5.441222386 | 4.169562349 |
| <i>Pdia2</i>    | 0.000499606 | 1.097698964  | 5.632030953 | 4.534331989 |
| <i>Pdilt</i>    | 0.0001817   | -1.251642858 | 3.73249355  | 4.984136409 |
| <i>Pfkfb3</i>   | 0.015028724 | 2.089110097  | 5.508825855 | 3.419715759 |
| <i>Pgm2l1</i>   | 6.86E-07    | -3.426203561 | 2.034749852 | 5.460953413 |
| <i>Phf19</i>    | 0.001367016 | -1.028196269 | 6.154148884 | 7.182345153 |
| <i>Phf19</i>    | 0.000523543 | -1.02302259  | 6.058763683 | 7.081786273 |
| <i>Phlda1</i>   | 0.000108754 | 1.561931972  | 8.973672411 | 7.41174044  |
| <i>Piga</i>     | 0.004718063 | 1.116255192  | 6.502362577 | 5.386107385 |
| <i>Pigr</i>     | 3.45E-08    | 4.466879488  | 8.959985061 | 4.493105573 |
| <i>Pik3c2g</i>  | 0.001121665 | 1.59813993   | 4.497369141 | 2.899229211 |
| <i>Pik3r5</i>   | 0.000199704 | 1.552190769  | 5.869159486 | 4.316968717 |
| <i>Pik3r5</i>   | 2.18E-05    | 1.555965266  | 5.923502992 | 4.367537726 |
| <i>Pip4k2a</i>  | 9.94E-06    | 1.069495694  | 6.453754938 | 5.384259244 |
| <i>Pip4k2a</i>  | 6.55E-05    | 1.075613488  | 6.522300485 | 5.446686997 |
| <i>Pip4k2a</i>  | 9.30E-05    | 1.156155247  | 6.500684979 | 5.344529732 |
| <i>Pira1</i>    | 5.71E-05    | 1.630157024  | 7.595308879 | 5.965151855 |
| <i>Pitx2</i>    | 0.012588358 | -1.704398785 | 2.911694978 | 4.616093764 |
| <i>Pkd1l2</i>   | 6.20E-05    | -1.070905728 | 5.37801897  | 6.448924698 |
| <i>Pkhd11l</i>  | 0.006071571 | 1.061114882  | 4.314383914 | 3.253269032 |
| <i>Pla2g12a</i> | 0.000283377 | -1.044591726 | 6.830367606 | 7.874959331 |
| <i>Pla2g12a</i> | 4.71E-05    | -1.121755872 | 6.842407812 | 7.964163683 |
| <i>Pla2g12a</i> | 2.63E-05    | -1.169688884 | 6.744561378 | 7.914250263 |
| <i>Pla2g4f</i>  | 0.000132845 | 1.433822804  | 6.981047194 | 5.54722439  |
| <i>Pla2g5</i>   | 0.002780343 | 1.690088568  | 4.850739667 | 3.1606511   |
| <i>Pla2g7</i>   | 0.000227073 | 1.34814565   | 7.448977748 | 6.100832098 |
| <i>Pla2g7</i>   | 0.00010322  | 1.517412429  | 7.605851055 | 6.088438625 |
| <i>Pla2g7</i>   | 2.14E-05    | 1.566517444  | 7.778034789 | 6.211517345 |
| <i>Plat</i>     | 1.43E-07    | 1.274763595  | 6.840259328 | 5.565495733 |

|                |             |              |             |             |
|----------------|-------------|--------------|-------------|-------------|
| <i>Plau</i>    | 0.010828151 | 2.334236934  | 8.449427598 | 6.115190665 |
| <i>Plau</i>    | 0.009474834 | 2.388969191  | 8.465659641 | 6.07669045  |
| <i>Plb1</i>    | 0.000785361 | 1.167156066  | 4.038302479 | 2.871146413 |
| <i>Plbd1</i>   | 1.84E-05    | 1.626510929  | 7.752999308 | 6.126488379 |
| <i>Plbd1</i>   | 2.27E-05    | 1.443830223  | 6.569643658 | 5.125813436 |
| <i>Plcb2</i>   | 0.006674374 | 1.748813741  | 3.958973105 | 2.210159364 |
| <i>Pld4</i>    | 1.76E-05    | 1.279991555  | 8.220744015 | 6.94075246  |
| <i>Pld4</i>    | 3.15E-05    | 1.387448541  | 8.245428647 | 6.857980106 |
| <i>Plek</i>    | 0.000997057 | 1.311274451  | 6.43420343  | 5.122928979 |
| <i>Plekha4</i> | 0.003164051 | -1.152682954 | 3.726487342 | 4.879170296 |
| <i>Plekhd1</i> | 0.001073217 | -1.048539184 | 4.158932494 | 5.207471679 |
| <i>Plekhd1</i> | 0.006010277 | -1.05220149  | 2.808116958 | 3.860318448 |
| <i>Plekho2</i> | 9.18E-07    | 1.098713513  | 7.71659701  | 6.617883496 |
| <i>Plxdc1</i>  | 0.016579842 | 1.054743361  | 3.924881053 | 2.870137692 |
| <i>Plxnb1</i>  | 0.000185721 | 1.35001059   | 5.216445055 | 3.866434465 |
| <i>Plxnc1</i>  | 0.000558224 | 2.602966662  | 4.098557131 | 1.495590468 |
| <i>Plxnc1</i>  | 0.000381755 | 2.182625364  | 3.852034579 | 1.669409214 |
| <i>Plxnd1</i>  | 1.70E-05    | 1.034682502  | 8.577083396 | 7.542400894 |
| <i>Plxnd1</i>  | 4.30E-06    | 1.150483492  | 8.747117915 | 7.596634424 |
| <i>Pmaip1</i>  | 7.57E-05    | 3.005737244  | 4.295544304 | 1.28980706  |
| <i>Pnpla3</i>  | 1.20E-06    | -1.85778443  | 9.849358262 | 11.70714269 |
| <i>Pnpla3</i>  | 1.27E-06    | -1.855255431 | 9.89813297  | 11.7533884  |
| <i>Pnpla3</i>  | 1.67E-06    | -1.949618303 | 9.826102742 | 11.77572104 |
| <i>Pnpla3</i>  | 3.70E-06    | -1.756160308 | 9.988666219 | 11.74482653 |
| <i>Pole</i>    | 0.009418562 | 1.434187186  | 5.013638957 | 3.579451771 |
| <i>Pon1</i>    | 0.021636551 | -1.031851951 | 3.000262124 | 4.032114076 |
| <i>Postn</i>   | 2.70E-05    | 1.0493878    | 8.405624467 | 7.356236668 |
| <i>Postn</i>   | 9.06E-06    | 1.023421774  | 8.336704153 | 7.31328238  |
| <i>Postn</i>   | 3.25E-05    | 1.15908817   | 8.535133197 | 7.376045027 |
| <i>Postn</i>   | 2.40E-06    | 1.099812069  | 8.422269994 | 7.322457925 |
| <i>Postn</i>   | 2.72E-05    | 1.015447338  | 8.320253218 | 7.30480588  |
| <i>Pou2f2</i>  | 0.004931373 | 1.263309301  | 4.67265875  | 3.409349449 |
| <i>Pou2f2</i>  | 0.005382862 | 1.022623319  | 4.521906262 | 3.499282943 |
| <i>Pou2f2</i>  | 0.0262141   | 1.305850976  | 4.623815074 | 3.317964098 |
| <i>Pou2f2</i>  | 0.005277034 | 1.284167877  | 4.350056124 | 3.065888247 |
| <i>Pou2f2</i>  | 0.005731731 | 1.161522418  | 4.329801746 | 3.168279327 |
| <i>Pou2f2</i>  | 0.014189844 | 1.001362429  | 4.448702963 | 3.447340534 |
| <i>Pou2f2</i>  | 0.000526436 | 1.469873293  | 4.759658786 | 3.289785493 |
| <i>Pou2f2</i>  | 0.006750836 | 1.487562259  | 4.707661112 | 3.220098853 |
| <i>Pou2f2</i>  | 0.000447485 | 1.136365812  | 4.586486415 | 3.450120603 |
| <i>Pou2f2</i>  | 0.002374913 | 1.358885366  | 4.543036755 | 3.18415139  |
| <i>Pou2f2</i>  | 0.039725938 | 1.003458431  | 4.348199298 | 3.344740867 |
| <i>Pou2f2</i>  | 0.009555684 | 1.044714499  | 4.582523253 | 3.537808754 |
| <i>Pou2f2</i>  | 0.037042652 | 1.185073572  | 4.623467083 | 3.438393511 |
| <i>Pou2f2</i>  | 0.003346762 | 1.056908276  | 4.708037466 | 3.65112919  |
| <i>Pou2f2</i>  | 0.003930668 | 1.016614398  | 4.571077988 | 3.55446359  |

|                 |             |              |             |             |
|-----------------|-------------|--------------|-------------|-------------|
| <i>Pou2f2</i>   | 0.006521609 | 1.479906946  | 4.564897841 | 3.084990895 |
| <i>Pou2f2</i>   | 0.002292859 | 1.111142717  | 4.543678685 | 3.432535968 |
| <i>Ppef1</i>    | 0.006117038 | -1.28322651  | 2.165161343 | 3.448387852 |
| <i>Ppfia4</i>   | 0.006997987 | 1.12759141   | 4.332668326 | 3.205076916 |
| <i>Ppfia4</i>   | 0.006257226 | 1.00255372   | 4.472409058 | 3.469855338 |
| <i>Ppp1r14c</i> | 0.010063406 | -1.000076055 | 2.982326706 | 3.982402761 |
| <i>Ppp1r18</i>  | 1.53E-05    | 1.399910631  | 7.016665394 | 5.616754763 |
| <i>Ppp1r18</i>  | 6.99E-07    | 1.266892037  | 6.958155777 | 5.691263741 |
| <i>Ppp1r18</i>  | 1.29E-05    | 1.230507017  | 7.004531103 | 5.774024086 |
| <i>Ppp1r18</i>  | 4.00E-06    | 1.209232761  | 6.828374945 | 5.619142184 |
| <i>Ppp1r18</i>  | 0.001024306 | 1.065539155  | 6.619261669 | 5.553722514 |
| <i>Ppp1r18</i>  | 1.63E-05    | 1.158317339  | 6.766104198 | 5.607786859 |
| <i>Ppp1r18</i>  | 2.83E-05    | 1.173673367  | 6.871171302 | 5.697497936 |
| <i>Ppp2r2d</i>  | 0.000839959 | -1.001151261 | 4.754438929 | 5.755590189 |
| <i>Prc1</i>     | 0.001214091 | 1.440533567  | 4.273850717 | 2.83331715  |
| <i>Prc1</i>     | 0.00390242  | 1.02782117   | 4.920783986 | 3.892962817 |
| <i>Prc1</i>     | 0.000551674 | 1.267794247  | 4.901262386 | 3.633468139 |
| <i>Prc1</i>     | 0.000464619 | 1.102310159  | 4.899309958 | 3.796999799 |
| <i>Prc1</i>     | 0.000704015 | 1.3757134    | 4.888001118 | 3.512287719 |
| <i>Prc1</i>     | 0.000796411 | 1.316409961  | 5.013254594 | 3.696844633 |
| <i>Prex1</i>    | 1.34E-05    | 1.448994023  | 7.285629519 | 5.836635497 |
| <i>Prg2</i>     | 0.000433738 | 1.62495927   | 3.14858107  | 1.5236218   |
| <i>Pros1</i>    | 0.000414662 | 1.074093097  | 6.627790036 | 5.553696939 |
| <i>Prr18</i>    | 0.004141068 | 2.137591373  | 3.979944346 | 1.842352973 |
| <i>Prr5l</i>    | 0.000447915 | 1.163783404  | 5.01945175  | 3.855668345 |
| <i>Prr5l</i>    | 9.62E-05    | 1.340976658  | 4.917460515 | 3.576483857 |
| <i>Prr5l</i>    | 0.00015235  | 1.464090648  | 5.042044726 | 3.577954078 |
| <i>Prr5l</i>    | 0.002106289 | 1.094451535  | 4.775362596 | 3.680911062 |
| <i>Prr5l</i>    | 0.000377257 | 1.435925202  | 4.875273516 | 3.439348315 |
| <i>Prr5l</i>    | 0.002798848 | 1.334443618  | 5.12276857  | 3.788324952 |
| <i>Prr5l</i>    | 0.000905902 | 1.565172931  | 5.011872298 | 3.446699367 |
| <i>Prr5l</i>    | 0.000800697 | 1.182020466  | 4.899394968 | 3.717374503 |
| <i>Prr5l</i>    | 0.000135928 | 1.767292899  | 5.09625448  | 3.328961582 |
| <i>Prr9</i>     | 7.55E-09    | 4.595895255  | 6.062941716 | 1.467046461 |
| <i>Prss37</i>   | 0.005759456 | 1.025287103  | 5.265818824 | 4.240531721 |
| <i>Prss41</i>   | 0.000115627 | -1.640057441 | 2.177289255 | 3.817346696 |
| <i>Prss41</i>   | 0.003407212 | -1.753576416 | 1.875542242 | 3.629118658 |
| <i>Prss48</i>   | 0.002033673 | -1.164670668 | 3.830947905 | 4.995618574 |
| <i>Prss58</i>   | 0.009085989 | -1.057227756 | 4.445601044 | 5.5028288   |
| <i>Psca</i>     | 4.25E-05    | 3.243781556  | 8.742901109 | 5.499119553 |
| <i>Psemb8</i>   | 1.16E-05    | 1.393763461  | 6.999480262 | 5.605716801 |
| <i>Psemb8</i>   | 0.000133563 | 1.570899102  | 7.19427699  | 5.623377888 |
| <i>Psemb8</i>   | 0.000146241 | 1.269732058  | 7.015109878 | 5.74537782  |
| <i>Psemb8</i>   | 4.93E-05    | 1.397647475  | 7.115270126 | 5.717622652 |
| <i>Pstpip2</i>  | 0.000255579 | 1.016772374  | 6.324868724 | 5.30809635  |
| <i>Pstpip2</i>  | 0.000150689 | 1.241057632  | 6.346072229 | 5.105014597 |

|                |             |              |             |             |
|----------------|-------------|--------------|-------------|-------------|
| <i>Ptgs</i>    | 0.014263188 | 2.319150075  | 5.325371984 | 3.00622191  |
| <i>Ptgs2</i>   | 0.032343355 | 3.461252322  | 6.246894675 | 2.785642354 |
| <i>Ptp4a3</i>  | 1.20E-05    | -1.082827387 | 8.460777345 | 9.543604732 |
| <i>Ptp4a3</i>  | 2.10E-05    | -1.154206814 | 8.411811085 | 9.566017899 |
| <i>Ptp4a3</i>  | 1.33E-05    | -1.154152427 | 8.424205886 | 9.578358313 |
| <i>Ptpn22</i>  | 0.003907497 | 2.04780067   | 3.769526449 | 1.721725779 |
| <i>Ptpn22</i>  | 0.0003122   | 2.480411843  | 3.356722943 | 0.8763111   |
| <i>Ptpn22</i>  | 0.000234504 | -1.010788881 | 4.000395937 | 5.011184818 |
| <i>Ptpn22</i>  | 1.11E-06    | 2.691288912  | 3.764525215 | 1.073236303 |
| <i>Ptpn22</i>  | 0.00330745  | 1.93094164   | 3.920686662 | 1.989745022 |
| <i>Ptpn22</i>  | 6.34E-05    | 2.5813219    | 3.804243579 | 1.222921679 |
| <i>Ptpn7</i>   | 2.93E-05    | 1.411511692  | 4.151160804 | 2.739649113 |
| <i>Ptpn7</i>   | 0.003484663 | 1.735649955  | 4.59519614  | 2.859546186 |
| <i>Ptpn7</i>   | 0.000597692 | 1.609621747  | 4.318830897 | 2.70920915  |
| <i>Ptprc</i>   | 0.000202195 | 2.326690228  | 6.299104406 | 3.972414178 |
| <i>Ptprc</i>   | 0.001059793 | 1.805115797  | 5.936885244 | 4.131769447 |
| <i>Ptprc</i>   | 1.71E-06    | 1.485433401  | 6.123700082 | 4.638266681 |
| <i>Ptprc</i>   | 3.14E-06    | 1.688586489  | 6.05830577  | 4.369719282 |
| <i>Ptprc</i>   | 1.98E-06    | 1.987495499  | 6.294674155 | 4.307178656 |
| <i>Ptprc</i>   | 4.95E-06    | 1.757250253  | 6.222203749 | 4.464953497 |
| <i>Ptprc</i>   | 2.07E-05    | 1.957669911  | 6.228687494 | 4.271017583 |
| <i>Ptprc</i>   | 1.14E-05    | 2.102460758  | 6.319398758 | 4.216938    |
| <i>Ptprc</i>   | 3.19E-07    | 1.985522981  | 6.309480182 | 4.323957201 |
| <i>Ptprd</i>   | 0.00142407  | -1.008954963 | 3.750519456 | 4.759474418 |
| <i>Ptpre</i>   | 0.003255927 | 1.833842249  | 4.711911134 | 2.878068886 |
| <i>Ptpro</i>   | 3.19E-05    | 1.108003049  | 5.73501719  | 4.627014142 |
| <i>Ptpru</i>   | 0.000349479 | 1.20899802   | 4.8622008   | 3.653202781 |
| <i>Ptpru</i>   | 0.001118015 | 1.13503688   | 4.590949942 | 3.455913062 |
| <i>Ptpru</i>   | 0.000427038 | 1.407538322  | 4.699640139 | 3.292101818 |
| <i>Pxt1</i>    | 0.000622983 | -1.331587976 | 3.053656638 | 4.385244614 |
| <i>Pycr1</i>   | 8.84E-05    | -1.060245634 | 5.39649227  | 6.456737904 |
| <i>Pygl</i>    | 0.003745449 | 1.21879406   | 4.759773041 | 3.540978981 |
| <i>R3hdm2</i>  | 1.23E-05    | 1.164451922  | 8.989559347 | 7.825107425 |
| <i>Rab35</i>   | 9.81E-06    | -1.061732496 | 5.953800404 | 7.0155329   |
| <i>Rab36</i>   | 4.19E-05    | -1.257742937 | 4.001007208 | 5.258750145 |
| <i>Rab36</i>   | 6.90E-05    | -1.150692453 | 4.100751757 | 5.25144421  |
| <i>Rab3il1</i> | 6.28E-06    | -1.210028303 | 4.315955725 | 5.525984027 |
| <i>Racgap1</i> | 0.009968348 | 1.374408188  | 5.507179618 | 4.13277143  |
| <i>Racgap1</i> | 9.92E-05    | 1.428777508  | 5.55696474  | 4.128187232 |
| <i>Racgap1</i> | 0.000736877 | 1.116459305  | 5.479395792 | 4.362936486 |
| <i>Racgap1</i> | 0.001816181 | 1.138037662  | 5.500239286 | 4.362201624 |
| <i>Racgap1</i> | 0.000161338 | 1.178584597  | 5.451738793 | 4.273154196 |
| <i>Racgap1</i> | 0.000296937 | 1.541878443  | 5.406729071 | 3.864850627 |
| <i>Racgap1</i> | 8.76E-05    | 1.548700545  | 5.631786138 | 4.083085593 |
| <i>Rad51b</i>  | 0.00261507  | 1.841537332  | 3.956645668 | 2.115108335 |
| <i>Rad51b</i>  | 0.003437174 | 1.230059178  | 5.133845326 | 3.903786148 |

|                 |             |              |             |             |
|-----------------|-------------|--------------|-------------|-------------|
| <i>Rad51b</i>   | 0.00623418  | -1.600986886 | 1.775520134 | 3.37650702  |
| <i>Rad51b</i>   | 0.001520041 | 1.142463968  | 4.28910276  | 3.146638793 |
| <i>Ralbp1</i>   | 0.031869171 | -1.446518012 | 2.343359544 | 3.789877556 |
| <i>Rasal3</i>   | 0.003543455 | 1.074022467  | 5.263134819 | 4.189112352 |
| <i>Rasal3</i>   | 0.00051544  | 1.210382567  | 5.147320498 | 3.936937931 |
| <i>Rasal3</i>   | 0.000660114 | 1.201756713  | 5.163783499 | 3.962026787 |
| <i>Rasal3</i>   | 0.00072918  | 1.049827464  | 5.156166399 | 4.106338935 |
| <i>Rasgef1a</i> | 2.59E-05    | 2.886001906  | 3.858628692 | 0.972626786 |
| <i>Rasgef1a</i> | 0.002197894 | 1.82703328   | 3.815796133 | 1.988762853 |
| <i>Rasgef1a</i> | 2.07E-07    | 3.10615417   | 4.156218459 | 1.050064289 |
| <i>Rasgef1a</i> | 0.000226863 | 2.49846273   | 4.201547808 | 1.703085078 |
| <i>Rasgef1a</i> | 6.02E-05    | 2.594041406  | 3.818724791 | 1.224683385 |
| <i>Rasgrp1</i>  | 0.000250992 | 1.59351068   | 4.333538599 | 2.74002792  |
| <i>Rasgrp3</i>  | 0.011756479 | 1.052820377  | 4.630566952 | 3.577746575 |
| <i>Rasgrp4</i>  | 0.009100651 | 1.873247773  | 4.221755243 | 2.34850747  |
| <i>Rasgrp4</i>  | 0.001733539 | 1.697839384  | 4.055628231 | 2.357788847 |
| <i>Rassf4</i>   | 3.78E-05    | 1.038962503  | 6.751902799 | 5.712940296 |
| <i>Rbm34</i>    | 5.42E-05    | -1.067701331 | 6.745448134 | 7.813149465 |
| <i>Rbm34</i>    | 6.05E-05    | -1.056722945 | 6.774381695 | 7.83110464  |
| <i>Rbms3</i>    | 0.005375294 | 1.087600258  | 8.913358453 | 7.825758195 |
| <i>Rcsd1</i>    | 0.000180016 | 1.197574009  | 6.179699244 | 4.982125235 |
| <i>Reg3g</i>    | 0.000128275 | 3.073884613  | 4.061721531 | 0.987836918 |
| <i>Rel</i>      | 0.000146262 | 1.152502987  | 5.756908172 | 4.604405185 |
| <i>Relb</i>     | 0.000655473 | 1.992154936  | 4.384738497 | 2.392583561 |
| <i>Relb</i>     | 0.002791207 | 1.259083247  | 4.261931395 | 3.002848148 |
| <i>Relb</i>     | 0.000448164 | 1.169012041  | 5.609991161 | 4.44097912  |
| <i>Relb</i>     | 0.001152071 | 2.465038742  | 4.329605733 | 1.864566991 |
| <i>Rexo1</i>    | 0.011038994 | 1.251017708  | 3.910265315 | 2.659247607 |
| <i>Rgs1</i>     | 0.031803219 | 1.675142367  | 4.348000048 | 2.672857681 |
| <i>Rgs4</i>     | 0.0004564   | 1.152177231  | 4.963320415 | 3.811143184 |
| <i>Rgs7</i>     | 0.001595431 | -1.107152622 | 3.998334989 | 5.105487611 |
| <i>Rgs7</i>     | 0.001095736 | -1.055084442 | 3.984440219 | 5.039524661 |
| <i>Rgs9</i>     | 0.001380051 | 1.569740819  | 3.854734886 | 2.284994068 |
| <i>Rhoc</i>     | 9.86E-07    | 1.04258563   | 9.511556378 | 8.468970748 |
| <i>Rhou</i>     | 2.68E-06    | 1.402877711  | 6.446838169 | 5.043960458 |
| <i>Riid1</i>    | 0.003339894 | -2.115003466 | 2.114362047 | 4.229365513 |
| <i>Rimklb</i>   | 0.00477253  | -2.029465843 | 1.977362072 | 4.006827915 |
| <i>Rimklb</i>   | 3.19E-05    | -2.197710743 | 1.952939895 | 4.150650638 |
| <i>Rimklb</i>   | 0.00010394  | -2.058635324 | 2.099292643 | 4.157927967 |
| <i>Rimklb</i>   | 0.000142498 | -1.98736035  | 2.065793203 | 4.053153553 |
| <i>Rimklb</i>   | 0.001046604 | -2.173661463 | 2.168703404 | 4.342364867 |
| <i>Rimklb</i>   | 0.000968252 | -1.862032596 | 2.504353117 | 4.366385713 |
| <i>Rims2</i>    | 0.00187536  | 1.50945624   | 3.759278746 | 2.249822506 |
| <i>Rims2</i>    | 4.85E-05    | 1.305383999  | 4.610860003 | 3.305476003 |
| <i>Rims2</i>    | 5.61E-05    | 1.062380681  | 4.465915134 | 3.403534453 |
| <i>Rin2</i>     | 0.001235403 | 1.200316903  | 5.620023772 | 4.419706868 |

|                |             |              |             |             |
|----------------|-------------|--------------|-------------|-------------|
| <i>Rin3</i>    | 2.25E-05    | 1.057675784  | 7.106330517 | 6.048654734 |
| <i>Rinl</i>    | 0.000519519 | 2.049602981  | 3.934433837 | 1.884830856 |
| <i>Ripk3</i>   | 0.000180212 | 1.083278523  | 6.729249945 | 5.645971421 |
| <i>Rlbp1</i>   | 8.41E-05    | 1.098200189  | 6.940485072 | 5.842284883 |
| <i>Rlbp1</i>   | 0.000294751 | 1.169475067  | 7.117188299 | 5.947713232 |
| <i>Rmdn1</i>   | 0.002454225 | -1.099596685 | 5.536363931 | 6.635960616 |
| <i>Rnase6</i>  | 0.000431542 | 1.517824254  | 4.610197441 | 3.092373187 |
| <i>Rnf112</i>  | 0.012436372 | -1.017325353 | 3.674577088 | 4.691902442 |
| <i>Rnf213</i>  | 0.000139478 | 1.045926984  | 8.707411441 | 7.661484457 |
| <i>Rnf213</i>  | 0.000144045 | 1.060336661  | 8.71399815  | 7.653661489 |
| <i>Rnf222</i>  | 0.013490583 | -1.296614688 | 2.860912263 | 4.157526951 |
| <i>Ropn1l</i>  | 0.000643771 | -1.212695125 | 4.822932534 | 6.035627659 |
| <i>Rsad2</i>   | 0.000253498 | 2.604070123  | 5.92974692  | 3.325676797 |
| <i>Rtp4</i>    | 0.000863328 | 1.457196418  | 8.242392297 | 6.78519588  |
| <i>Rtp4</i>    | 0.000319974 | 1.606695525  | 8.424878494 | 6.818182969 |
| <i>Runx1</i>   | 0.000136614 | 1.819722657  | 6.749016856 | 4.929294199 |
| <i>Runx1</i>   | 0.00010407  | 1.60562119   | 6.977399649 | 5.371778459 |
| <i>Runx1</i>   | 0.000208021 | 1.817492346  | 6.92181754  | 5.104325194 |
| <i>Runx1</i>   | 0.00010685  | 1.55962339   | 6.70892067  | 5.14929728  |
| <i>Runx2</i>   | 0.000122036 | 1.044043637  | 6.754606641 | 5.710563004 |
| <i>Runx2</i>   | 1.20E-06    | 1.259858823  | 6.776370554 | 5.516511731 |
| <i>Runx3</i>   | 0.001160727 | 2.084412548  | 3.842294096 | 1.757881548 |
| <i>Rxfp2</i>   | 0.000817544 | -1.01952011  | 3.467968604 | 4.487488714 |
| <i>S100a10</i> | 1.42E-05    | 1.144564329  | 9.035437297 | 7.890872969 |
| <i>S100a11</i> | 3.89E-06    | 1.196572692  | 11.63613447 | 10.43956178 |
| <i>S100a14</i> | 0.006305169 | 1.984583711  | 5.132864295 | 3.148280584 |
| <i>S100a14</i> | 0.002342721 | 2.515153157  | 3.92703366  | 1.411880503 |
| <i>S100a14</i> | 0.000229512 | 1.846666235  | 4.159376145 | 2.31270991  |
| <i>S100a8</i>  | 1.89E-07    | 4.930497747  | 6.318091764 | 1.387594017 |
| <i>S100a9</i>  | 1.98E-05    | 5.159845781  | 7.722713157 | 2.562867376 |
| <i>S100a9</i>  | 0.000511941 | 4.858299274  | 7.839228481 | 2.980929207 |
| <i>S1pr1</i>   | 1.56E-06    | 1.074817525  | 5.728514576 | 4.653697051 |
| <i>Saa1</i>    | 3.76E-05    | 3.910794641  | 4.817244597 | 0.906449956 |
| <i>Saa1</i>    | 0.000104566 | 3.56314593   | 4.587077349 | 1.02393142  |
| <i>Saa1</i>    | 0.000102394 | 3.945960801  | 4.890968226 | 0.945007425 |
| <i>Saa1</i>    | 3.71E-05    | 3.573015524  | 4.806117347 | 1.233101823 |
| <i>Saa2</i>    | 0.003677742 | 2.277043218  | 4.081716604 | 1.804673386 |
| <i>Saa2</i>    | 0.002257461 | 2.414465688  | 3.991631246 | 1.577165558 |
| <i>Saa2</i>    | 0.00050298  | 2.520593373  | 4.018667527 | 1.498074153 |
| <i>Saa2</i>    | 0.000162728 | 2.922594653  | 4.001961887 | 1.079367234 |
| <i>Saa3</i>    | 0.000190759 | 2.278166078  | 7.853972298 | 5.57580622  |
| <i>Samd12</i>  | 0.000408658 | -1.146412244 | 5.732800064 | 6.879212308 |
| <i>Samd5</i>   | 2.09E-05    | 2.030384042  | 3.713504959 | 1.683120917 |
| <i>Sash3</i>   | 3.34E-05    | 1.222536991  | 6.020773006 | 4.798236016 |
| <i>Sash3</i>   | 7.43E-05    | 1.016146904  | 5.978973611 | 4.962826707 |
| <i>Saxo2</i>   | 0.024157739 | -1.792276643 | 1.808684532 | 3.600961175 |

|                  |             |              |             |             |
|------------------|-------------|--------------|-------------|-------------|
| <i>Scara3</i>    | 5.37E-07    | 2.910755204  | 8.351941826 | 5.441186622 |
| <i>Scara3</i>    | 1.70E-07    | 3.07039514   | 8.221937868 | 5.151542728 |
| <i>Scel</i>      | 0.000529812 | 1.19104828   | 4.495122745 | 3.304074466 |
| <i>Scin</i>      | 0.006858855 | 1.283561498  | 5.714260393 | 4.430698895 |
| <i>Scn1b</i>     | 3.88E-05    | 1.370278435  | 7.413868212 | 6.043589777 |
| <i>Scn1b</i>     | 0.001536664 | 1.037219007  | 7.051156599 | 6.013937592 |
| <i>Scn3b</i>     | 0.018594966 | 1.062219456  | 3.571554526 | 2.509335071 |
| <i>Scn3b</i>     | 0.014908356 | 1.013578143  | 3.921355299 | 2.907777156 |
| <i>Scnn1b</i>    | 3.87E-05    | 1.539799384  | 4.442496371 | 2.902696987 |
| <i>Scnn1b</i>    | 0.007084431 | 1.515443317  | 4.460908546 | 2.945465229 |
| <i>Scnn1b</i>    | 0.000259047 | 1.585344629  | 4.561723846 | 2.976379217 |
| <i>Sdcbp2</i>    | 0.000900284 | 1.718696248  | 5.779565741 | 4.060869493 |
| <i>Sdcbp2</i>    | 3.81E-05    | 1.694551587  | 5.679334668 | 3.984783081 |
| <i>Sdcbp2</i>    | 3.47E-05    | 2.074521119  | 5.65325182  | 3.578730701 |
| <i>Sec16b</i>    | 0.003470962 | -1.38403002  | 4.671129931 | 6.055159951 |
| <i>Sec16b</i>    | 0.001030168 | -1.222495956 | 4.954582378 | 6.177078334 |
| <i>Sectm1a</i>   | 0.000358646 | 1.516515132  | 6.853532409 | 5.337017277 |
| <i>Sectm1a</i>   | 0.000360933 | 1.37184515   | 6.630286411 | 5.258441261 |
| <i>Sectm1a</i>   | 0.000463208 | 1.310248316  | 6.647915681 | 5.337667366 |
| <i>Sectm1a</i>   | 0.0001898   | 2.187051295  | 5.875339475 | 3.68828818  |
| <i>Sectm1a</i>   | 0.000217199 | 1.505302412  | 6.716167951 | 5.210865539 |
| <i>Sectm1b</i>   | 4.79E-07    | 3.427902205  | 7.071093275 | 3.643191071 |
| <i>Sectm1b</i>   | 2.64E-06    | 3.559294842  | 7.034876583 | 3.475581741 |
| <i>Sectm1b</i>   | 2.37E-05    | 3.828481253  | 7.10396293  | 3.275481678 |
| <i>Sectm1b</i>   | 2.44E-06    | 4.272920709  | 6.992903052 | 2.719982343 |
| <i>Sell</i>      | 0.010563907 | 1.9806996    | 4.318493399 | 2.3377938   |
| <i>Sell</i>      | 0.004114326 | 1.653230129  | 4.330098396 | 2.676868267 |
| <i>Sell</i>      | 0.000756985 | 1.708788176  | 4.529297865 | 2.820509688 |
| <i>Sema3d</i>    | 7.44E-06    | 1.859774168  | 9.058426272 | 7.198652104 |
| <i>Sema6d</i>    | 0.000758495 | 1.115117089  | 5.289764022 | 4.174646933 |
| <i>Sept1</i>     | 0.041154233 | 1.480050552  | 3.24827187  | 1.768221318 |
| <i>Sept1</i>     | 0.02526945  | 1.676873919  | 3.548586985 | 1.871713066 |
| <i>Sept1</i>     | 0.00073955  | 2.037298767  | 3.211909651 | 1.174610884 |
| <i>Sept3</i>     | 0.003479388 | 1.788807101  | 3.853216709 | 2.064409608 |
| <i>Sept3</i>     | 0.004947482 | 1.497908     | 3.930591445 | 2.432683446 |
| <i>Sept9</i>     | 3.74E-06    | 1.032638838  | 8.645116892 | 7.612478055 |
| <i>Serp2</i>     | 0.000208825 | -2.437601299 | 4.068915499 | 6.506516798 |
| <i>Serp2</i>     | 2.23E-06    | -2.244144966 | 4.282510296 | 6.526655262 |
| <i>Serpina16</i> | 0.019825385 | 2.263360376  | 5.232237231 | 2.968876856 |
| <i>Serpina3c</i> | 0.035978226 | 1.067827665  | 5.00469894  | 3.936871275 |
| <i>Serpina3g</i> | 0.001829734 | 1.592058654  | 4.888388292 | 3.296329638 |
| <i>Serpina3i</i> | 1.23E-07    | 1.900387782  | 7.253805718 | 5.353417936 |
| <i>Serpina3i</i> | 0.000284626 | 2.169942199  | 3.753080155 | 1.583137956 |
| <i>Serpina3i</i> | 0.023076668 | 1.657837622  | 3.922179613 | 2.264341991 |
| <i>Serpina3i</i> | 1.67E-05    | 2.01773449   | 4.085638398 | 2.067903909 |
| <i>Serpina3i</i> | 2.58E-06    | 1.339684616  | 3.799114759 | 2.459430143 |

|                  |             |              |             |             |
|------------------|-------------|--------------|-------------|-------------|
| <i>Serpina3j</i> | 1.07E-05    | 2.196965912  | 7.753222502 | 5.55625659  |
| <i>Serpina3j</i> | 5.43E-06    | 1.708093068  | 7.617013947 | 5.908920879 |
| <i>Serpina3j</i> | 2.16E-08    | 1.744700985  | 7.764919681 | 6.020218696 |
| <i>Serpina3n</i> | 4.14E-08    | 2.93623861   | 10.51358494 | 7.577346334 |
| <i>Serpina3n</i> | 6.79E-08    | 2.686245782  | 10.19677636 | 7.510530574 |
| <i>Serpina5</i>  | 5.59E-08    | -3.515011163 | 1.09014174  | 4.605152903 |
| <i>Serpina5</i>  | 1.99E-07    | -3.405206828 | 1.038296412 | 4.44350324  |
| <i>Serpinb10</i> | 0.002037849 | -2.533662058 | 1.624762812 | 4.158424871 |
| <i>Serpinb10</i> | 4.82E-05    | -2.594274782 | 1.509116658 | 4.10339144  |
| <i>Serpinb6b</i> | 0.00285539  | 1.328701408  | 4.700697094 | 3.371995686 |
| <i>Serpinb8</i>  | 0.001340364 | 1.102380881  | 5.569416647 | 4.467035767 |
| <i>Serpinb9</i>  | 0.00071594  | 1.072853303  | 6.862238592 | 5.789385289 |
| <i>Serpine2</i>  | 0.000441587 | 1.131977567  | 12.05438534 | 10.92240777 |
| <i>Sertm1</i>    | 0.000343509 | 1.105937993  | 3.486290243 | 2.380352249 |
| <i>Sfrp1</i>     | 0.000604527 | 1.369142199  | 10.39649138 | 9.027349183 |
| <i>Sfrp1</i>     | 0.001167176 | 1.277119678  | 10.33061373 | 9.053494056 |
| <i>Sftpd</i>     | 0.000402267 | 3.188187805  | 4.49948271  | 1.311294905 |
| <i>Sh3kbp1</i>   | 0.002882783 | -1.187276901 | 2.560859277 | 3.748136178 |
| <i>Sh3kbp1</i>   | 0.013998108 | -1.396312039 | 2.428167347 | 3.824479386 |
| <i>Sh3kbp1</i>   | 0.026688007 | -1.04190751  | 2.943418444 | 3.985325954 |
| <i>Sh3kbp1</i>   | 0.037570906 | -1.558922849 | 2.648253297 | 4.207176146 |
| <i>Sh3kbp1</i>   | 0.004102382 | -1.725740123 | 1.943083447 | 3.668823571 |
| <i>Sh3kbp1</i>   | 0.019249532 | -1.541417606 | 2.382534188 | 3.923951794 |
| <i>Sh3tc1</i>    | 0.024016753 | 1.198263465  | 4.486002832 | 3.287739367 |
| <i>Shank2</i>    | 0.000314014 | -1.049875578 | 4.786112037 | 5.835987615 |
| <i>Shisa7</i>    | 0.000941238 | -1.023548644 | 2.94890546  | 3.972454103 |
| <i>Shisa7</i>    | 0.031697597 | -1.529148199 | 2.379276041 | 3.90842424  |
| <i>Shisa7</i>    | 0.018892978 | -1.890345428 | 2.667947784 | 4.558293212 |
| <i>Shisa7</i>    | 0.002095933 | -1.272689104 | 3.249380535 | 4.522069639 |
| <i>Shisa7</i>    | 0.001533042 | -1.613778267 | 2.403596318 | 4.017374585 |
| <i>Shisa7</i>    | 0.030735846 | -1.487316324 | 2.784493297 | 4.271809621 |
| <i>Siglec1</i>   | 7.16E-06    | 1.161921177  | 5.961121574 | 4.799200396 |
| <i>Siglec1</i>   | 9.93E-05    | 1.085346051  | 5.994679073 | 4.909333022 |
| <i>Siglece</i>   | 0.001164661 | 2.334455761  | 4.816195706 | 2.481739944 |
| <i>Siglece</i>   | 0.000135546 | 2.605410041  | 5.09259937  | 2.487189328 |
| <i>Siglece</i>   | 5.71E-05    | 2.669130439  | 4.928276167 | 2.259145728 |
| <i>Siglece</i>   | 0.002231662 | 2.690449843  | 4.766032856 | 2.075583013 |
| <i>Siglece</i>   | 0.00076063  | 2.592967798  | 4.652779625 | 2.059811826 |
| <i>Siglecg</i>   | 7.31E-05    | 1.023913552  | 5.564170535 | 4.540256983 |
| <i>Sirpa</i>     | 1.11E-06    | 1.81416615   | 7.98311849  | 6.168952339 |
| <i>Sirpa</i>     | 0.000197419 | 1.230627738  | 6.000561608 | 4.76993387  |
| <i>Sirpa</i>     | 5.33E-05    | 1.035396859  | 5.836533261 | 4.801136403 |
| <i>Sirpa</i>     | 3.51E-07    | 1.831041032  | 8.074066494 | 6.243025462 |
| <i>Sirpa</i>     | 5.92E-08    | 1.849915218  | 8.190611558 | 6.34069634  |
| <i>Sirpa</i>     | 1.89E-05    | 1.150066717  | 5.932298563 | 4.782231846 |
| <i>Sirpa</i>     | 9.00E-07    | 1.835242531  | 8.148834513 | 6.313591982 |



|                 |             |              |             |             |
|-----------------|-------------|--------------|-------------|-------------|
| <i>Sirpa</i>    | 7.01E-07    | 1.710188606  | 8.000341981 | 6.290153375 |
| <i>Sirpa</i>    | 2.58E-07    | 1.806043156  | 8.115391006 | 6.30934785  |
| <i>Sirpb1a</i>  | 0.000457428 | 2.999371985  | 4.965304549 | 1.965932564 |
| <i>Skida1</i>   | 0.000244044 | -2.259492107 | 1.426269143 | 3.68576125  |
| <i>Skida1</i>   | 0.003376793 | -1.949701722 | 1.521253273 | 3.470954995 |
| <i>Sla</i>      | 3.09E-05    | 1.194989607  | 6.135782299 | 4.940792692 |
| <i>Slamf6</i>   | 1.56E-05    | 1.120840583  | 10.54477636 | 9.423935782 |
| <i>Slc10a2</i>  | 0.006652474 | 1.751544188  | 3.606489153 | 1.854944965 |
| <i>Slc11a1</i>  | 0.001007615 | 1.15163723   | 6.325411289 | 5.173774059 |
| <i>Slc11a1</i>  | 0.000538421 | 1.246393052  | 6.268681787 | 5.022288734 |
| <i>Slc12a2</i>  | 1.67E-06    | 2.892308716  | 8.15774834  | 5.265439624 |
| <i>Slc12a2</i>  | 1.05E-06    | 2.999599544  | 8.206604326 | 5.207004781 |
| <i>Slc12a2</i>  | 4.00E-07    | 2.895261734  | 8.233364941 | 5.338103207 |
| <i>Slc12a2</i>  | 1.46E-07    | 3.212618765  | 8.30704482  | 5.094426056 |
| <i>Slc14a1</i>  | 0.002239515 | 1.089963973  | 3.820427792 | 2.730463819 |
| <i>Slc14a1</i>  | 0.017103966 | 1.193318129  | 4.180650243 | 2.987332115 |
| <i>Slc14a2</i>  | 4.54E-05    | 1.824821551  | 3.847772178 | 2.022950626 |
| <i>Slc15a3</i>  | 0.001634903 | 1.353709864  | 4.652232699 | 3.298522835 |
| <i>Slc16a12</i> | 0.000414801 | 1.614123513  | 4.405791317 | 2.791667805 |
| <i>Slc16a12</i> | 6.08E-05    | 1.735156518  | 4.582585661 | 2.847429143 |
| <i>Slc16a12</i> | 0.004341098 | 1.293338587  | 4.480326624 | 3.186988038 |
| <i>Slc16a12</i> | 0.000654295 | 1.827009882  | 4.39500639  | 2.567996508 |
| <i>Slc16a6</i>  | 0.021647275 | 1.091228343  | 4.232879752 | 3.141651409 |
| <i>Slc18b1</i>  | 0.011657508 | -1.717682286 | 2.205635596 | 3.923317882 |
| <i>Slc20a1</i>  | 0.003113294 | 1.073395563  | 6.265092423 | 5.19169686  |
| <i>Slc25a13</i> | 0.000109188 | -1.41611582  | 2.071465804 | 3.487581624 |
| <i>Slc25a21</i> | 3.48E-07    | 1.602050136  | 9.934901864 | 8.332851728 |
| <i>Slc25a24</i> | 3.16E-06    | 1.304928637  | 6.714944723 | 5.410016086 |
| <i>Slc25a24</i> | 0.000127377 | 1.304363587  | 6.562069931 | 5.257706344 |
| <i>Slc25a34</i> | 0.0118955   | -1.06904182  | 2.646565849 | 3.715607669 |
| <i>Slc25a48</i> | 0.009760239 | 1.635161256  | 3.352395845 | 1.717234589 |
| <i>Slc25a48</i> | 0.001553789 | 2.254717156  | 3.543108744 | 1.288391587 |
| <i>Slc26a9</i>  | 0.000186887 | -1.017443958 | 5.43156828  | 6.449012238 |
| <i>Slc27a3</i>  | 0.000146229 | 1.071345081  | 5.82066704  | 4.749321959 |
| <i>Slc27a3</i>  | 0.000211543 | 1.428225425  | 5.86224959  | 4.434024165 |
| <i>Slc27a3</i>  | 0.000137118 | 1.18862545   | 5.948662541 | 4.760037091 |
| <i>Slc28a1</i>  | 0.007736368 | -1.41775523  | 2.716954684 | 4.134709914 |
| <i>Slc2a12</i>  | 0.021082974 | 1.273403552  | 4.376026059 | 3.102622507 |
| <i>Slc2a12</i>  | 0.004511953 | 1.590335231  | 4.293947521 | 2.703612291 |
| <i>Slc34a1</i>  | 3.72E-05    | -1.061818542 | 4.019721697 | 5.081540239 |
| <i>Slc34a2</i>  | 0.000123562 | 2.296501715  | 7.307087526 | 5.010585812 |
| <i>Slc34a2</i>  | 1.52E-05    | 2.51927752   | 7.0656731   | 4.54639558  |
| <i>Slc38a4</i>  | 0.00215755  | -1.295602518 | 2.498801426 | 3.794403944 |
| <i>Slc38a4</i>  | 0.01365244  | -1.739674021 | 2.315312488 | 4.054986509 |
| <i>Slc38a4</i>  | 0.005920218 | -1.128933139 | 2.980332622 | 4.109265761 |
| <i>Slc38a4</i>  | 0.012507921 | -1.61544279  | 2.317840523 | 3.933283313 |

|                |             |              |             |             |
|----------------|-------------|--------------|-------------|-------------|
| <i>Slc38a4</i> | 0.017741574 | -1.855611388 | 2.272266095 | 4.127877482 |
| <i>Slc39a5</i> | 0.000365231 | -1.531001982 | 4.393898545 | 5.924900526 |
| <i>Slc39a5</i> | 8.17E-05    | -1.738665488 | 4.271247128 | 6.009912615 |
| <i>Slc39a5</i> | 1.57E-06    | -1.610482817 | 4.271741173 | 5.88222399  |
| <i>Slc39a5</i> | 1.38E-05    | -1.418291347 | 4.634445088 | 6.052736435 |
| <i>Slc39a5</i> | 8.49E-07    | -1.587180691 | 4.264852529 | 5.85203322  |
| <i>Slc39a5</i> | 1.52E-05    | -1.525494038 | 4.400889844 | 5.926383882 |
| <i>Slc39a5</i> | 4.23E-05    | -1.368333962 | 4.42694537  | 5.795279332 |
| <i>Slc40a1</i> | 4.40E-05    | 1.993523622  | 6.407949048 | 4.414425426 |
| <i>Slc43a2</i> | 7.30E-05    | 1.059412727  | 6.000364265 | 4.940951538 |
| <i>Slc47a2</i> | 0.019150656 | -1.028834546 | 3.917013025 | 4.945847571 |
| <i>Slc4a5</i>  | 0.037164562 | -1.455484655 | 2.033264143 | 3.488748798 |
| <i>Slc5a9</i>  | 0.002891989 | 1.696181025  | 4.805766724 | 3.109585699 |
| <i>Slc5a9</i>  | 0.000134182 | 1.409813261  | 4.762099488 | 3.352286227 |
| <i>Slc5a9</i>  | 0.000707919 | 1.638864776  | 4.721054387 | 3.082189611 |
| <i>Slc6a2</i>  | 0.000615555 | 1.675151263  | 5.750590473 | 4.07543921  |
| <i>Slc6a2</i>  | 0.000277748 | 1.708495902  | 5.702021624 | 3.993525723 |
| <i>Slc6a2</i>  | 0.000483286 | 1.55172909   | 5.640691262 | 4.088962172 |
| <i>Slc7a15</i> | 0.006628701 | -1.431259199 | 2.864204525 | 4.295463724 |
| <i>Slc7a15</i> | 0.012841258 | -1.695602762 | 2.72102021  | 4.416622972 |
| <i>Slc8a1</i>  | 0.000754142 | 1.217204614  | 6.611625483 | 5.394420868 |
| <i>Slc8a1</i>  | 0.00130853  | 1.137037056  | 6.494046314 | 5.357009258 |
| <i>Slc9a3</i>  | 0.003981165 | -1.477658351 | 2.289308912 | 3.766967263 |
| <i>Slc9a3</i>  | 3.66E-05    | -1.33493768  | 5.78579522  | 7.120732901 |
| <i>Slco6d1</i> | 0.004319779 | -1.003226579 | 2.457216429 | 3.460443008 |
| <i>Sln2</i>    | 4.23E-05    | 1.526122602  | 6.353782645 | 4.827660043 |
| <i>Sln2</i>    | 3.79E-07    | 1.689461035  | 6.438122335 | 4.7486613   |
| <i>Sln2</i>    | 2.85E-07    | 1.656270579  | 6.417703208 | 4.761432629 |
| <i>Sln2</i>    | 0.00011365  | 1.905820437  | 6.439990121 | 4.534169685 |
| <i>Sln8</i>    | 0.004274683 | 1.39661813   | 4.073050448 | 2.676432318 |
| <i>Sln8</i>    | 0.010577759 | 1.033033176  | 3.828238522 | 2.795205345 |
| <i>Sln8</i>    | 0.010748585 | 1.131023692  | 3.777387215 | 2.646363523 |
| <i>Sln8</i>    | 0.0002991   | 1.426645287  | 3.896304828 | 2.469659541 |
| <i>Sln8</i>    | 0.003421218 | 1.487038245  | 4.056719995 | 2.56968175  |
| <i>Sln8</i>    | 0.003030322 | 1.423983017  | 3.986556238 | 2.562573221 |
| <i>Sln8</i>    | 0.008213128 | 1.769502437  | 3.847129549 | 2.077627112 |
| <i>Slpi</i>    | 0.000209308 | 2.332786905  | 8.110612866 | 5.777825961 |
| <i>Smcp</i>    | 0.002539624 | -2.024012673 | 1.528640597 | 3.55265327  |
| <i>Socs3</i>   | 0.001358992 | 2.879796115  | 4.682083684 | 1.802287569 |
| <i>Socs3</i>   | 0.000153836 | 2.462817885  | 5.071675367 | 2.608857482 |
| <i>Sox17</i>   | 0.017508394 | 1.24920382   | 3.485277838 | 2.236074018 |
| <i>Sox4</i>    | 0.000104662 | 1.644524863  | 6.402932483 | 4.75840762  |
| <i>Sox6</i>    | 0.013414158 | 1.345663161  | 6.665249948 | 5.319586787 |
| <i>Sp100</i>   | 0.000131579 | 1.068924855  | 5.218135775 | 4.14921092  |
| <i>Sp100</i>   | 0.001287644 | 1.103153149  | 5.34557669  | 4.242423541 |
| <i>Sp100</i>   | 5.32E-05    | 1.404815966  | 5.502585834 | 4.097769868 |

|                |             |              |             |             |
|----------------|-------------|--------------|-------------|-------------|
| <i>Sp100</i>   | 5.91E-05    | 1.288256701  | 5.516260312 | 4.228003611 |
| <i>Sp100</i>   | 0.00470848  | 1.178863995  | 5.496781505 | 4.31791751  |
| <i>Sp100</i>   | 0.001241079 | 1.323316342  | 5.330460497 | 4.007144155 |
| <i>Sp100</i>   | 9.34E-05    | 1.312258477  | 5.549519576 | 4.2372611   |
| <i>Sp100</i>   | 4.35E-05    | 1.555493943  | 5.787047971 | 4.231554028 |
| <i>Spata3</i>  | 0.000288303 | -1.268202981 | 3.544303192 | 4.812506173 |
| <i>Spats1</i>  | 2.59E-05    | -1.013276952 | 5.934962895 | 6.948239847 |
| <i>Spc25</i>   | 0.001112112 | 1.06630856   | 4.72955207  | 3.663243511 |
| <i>Spc25</i>   | 0.029157661 | 1.027890774  | 4.572076448 | 3.544185674 |
| <i>Spc25</i>   | 0.011681981 | 1.176819547  | 4.740702074 | 3.563882527 |
| <i>Spdl1</i>   | 0.011463111 | 1.074537087  | 4.548533682 | 3.473996595 |
| <i>Specc1</i>  | 0.000988792 | 1.144315943  | 4.716445051 | 3.572129108 |
| <i>Spi1</i>    | 0.000498335 | 1.142076529  | 6.478772961 | 5.336696431 |
| <i>Spi1</i>    | 0.000281901 | 1.090332374  | 5.548397524 | 4.45806515  |
| <i>Spi1</i>    | 3.48E-05    | 1.70440925   | 6.307543155 | 4.603133905 |
| <i>Spib</i>    | 4.45E-06    | 1.055039387  | 8.581664096 | 7.526624709 |
| <i>Spib</i>    | 5.49E-06    | 1.170941623  | 8.739323251 | 7.568381628 |
| <i>Spib</i>    | 1.86E-05    | 1.085101116  | 8.551695248 | 7.466594132 |
| <i>Spib</i>    | 2.13E-05    | 1.162343334  | 8.532547619 | 7.370204285 |
| <i>Spib</i>    | 7.73E-07    | 1.07060781   | 8.528694017 | 7.458086207 |
| <i>Spin2c</i>  | 0.018286647 | -1.003455955 | 2.77850252  | 3.781958475 |
| <i>Spn</i>     | 0.000220438 | 1.221232829  | 5.125464025 | 3.904231196 |
| <i>Spn</i>     | 6.58E-05    | 1.604581628  | 5.187312297 | 3.582730669 |
| <i>Spns2</i>   | 3.41E-06    | 1.480738375  | 7.3418086   | 5.861070224 |
| <i>Spns2</i>   | 6.08E-05    | 1.152088308  | 7.221930013 | 6.069841705 |
| <i>Spns2</i>   | 2.20E-05    | 1.266456598  | 7.12139431  | 5.854937712 |
| <i>Spns2</i>   | 0.000194783 | 1.015250421  | 7.056035901 | 6.040785481 |
| <i>Spns2</i>   | 1.97E-05    | 1.159418625  | 7.090337013 | 5.930918388 |
| <i>Spns2</i>   | 4.49E-05    | 1.142933123  | 7.190350316 | 6.047417193 |
| <i>Spns2</i>   | 3.57E-05    | 1.129319555  | 7.173672969 | 6.044353415 |
| <i>Spp1</i>    | 0.000508863 | 7.544867558  | 8.833682501 | 1.288814943 |
| <i>Spp1</i>    | 0.000630945 | 7.381063312  | 8.76734423  | 1.386280918 |
| <i>Spp1</i>    | 0.000497074 | 7.656080855  | 8.858528183 | 1.202447327 |
| <i>Spp1</i>    | 0.00039938  | 7.659018835  | 9.033757025 | 1.37473819  |
| <i>Spp1</i>    | 0.000597514 | 7.473181465  | 8.71540388  | 1.242222415 |
| <i>Spred2</i>  | 0.007914912 | -1.022696696 | 5.691149904 | 6.7138466   |
| <i>Sprr1a</i>  | 5.33E-06    | 4.148826545  | 9.833614414 | 5.68478787  |
| <i>Sprr2b</i>  | 9.16E-07    | 2.482988658  | 8.955168002 | 6.472179344 |
| <i>Srgn</i>    | 2.96E-05    | 1.01519407   | 10.41254186 | 9.397347785 |
| <i>Srpx</i>    | 1.15E-08    | 1.951939324  | 7.911953005 | 5.960013681 |
| <i>Srsf1</i>   | 0.020232108 | -1.101354176 | 2.508422635 | 3.609776811 |
| <i>Sst</i>     | 0.000451044 | 1.086355446  | 4.849024433 | 3.762668987 |
| <i>St3gal4</i> | 0.003407059 | 1.018408554  | 5.379469605 | 4.361061052 |
| <i>St3gal4</i> | 0.000318129 | 1.096107809  | 5.235019963 | 4.138912154 |
| <i>St3gal4</i> | 0.001213008 | 1.310461061  | 5.47103025  | 4.160569189 |
| <i>St3gal4</i> | 0.000240825 | 1.077428897  | 5.245564598 | 4.168135701 |

|                   |             |              |             |             |
|-------------------|-------------|--------------|-------------|-------------|
| <i>St6galnac3</i> | 0.002010042 | 1.246071397  | 4.062027232 | 2.815955835 |
| <i>St8sia4</i>    | 0.003745934 | 1.227455648  | 4.555192198 | 3.32773655  |
| <i>St8sia4</i>    | 0.000608143 | 1.166346294  | 3.867545365 | 2.701199072 |
| <i>Stab1</i>      | 0.000124179 | 1.288485956  | 7.746082929 | 6.457596973 |
| <i>Stap1</i>      | 0.003655063 | 2.568965187  | 4.571151163 | 2.002185976 |
| <i>Stap1</i>      | 0.00171616  | 1.226964677  | 4.283206102 | 3.056241425 |
| <i>Stard9</i>     | 0.014828905 | 1.169063959  | 3.398078431 | 2.229014472 |
| <i>Stat1</i>      | 2.73E-06    | 1.021501082  | 8.21947064  | 7.197969559 |
| <i>Stat4</i>      | 0.011949819 | 1.746531853  | 3.699955305 | 1.953423452 |
| <i>Stat4</i>      | 0.000674161 | 1.666813012  | 3.418072575 | 1.751259563 |
| <i>Steap4</i>     | 0.000560899 | 1.324066012  | 6.680115513 | 5.3560495   |
| <i>Stfa2</i>      | 0.03418234  | 1.089142812  | 4.078374854 | 2.989232041 |
| <i>Stk25</i>      | 0.000674959 | -1.094114414 | 3.355838261 | 4.449952675 |
| <i>Stmn1</i>      | 3.46E-05    | 1.092251697  | 9.15713017  | 8.064878473 |
| <i>Stmn3</i>      | 5.38E-05    | 1.025120716  | 9.536299135 | 8.51117842  |
| <i>Stra6</i>      | 4.02E-05    | 1.692760211  | 7.167655218 | 5.474895007 |
| <i>Stra6</i>      | 4.79E-05    | 1.375510572  | 7.024949343 | 5.649438771 |
| <i>Stra6</i>      | 0.000139782 | 1.503794426  | 7.179038752 | 5.675244326 |
| <i>Stra6</i>      | 5.41E-05    | 1.663812124  | 7.207376035 | 5.543563911 |
| <i>Stra6</i>      | 5.57E-05    | 1.675905185  | 7.333187336 | 5.657282151 |
| <i>Stra6</i>      | 0.000129564 | 1.622423604  | 7.23382187  | 5.611398266 |
| <i>Stra6</i>      | 9.45E-05    | 1.519239727  | 7.25055707  | 5.731317343 |
| <i>Stra6</i>      | 0.000212437 | 1.349065738  | 6.987065269 | 5.637999531 |
| <i>Stx11</i>      | 0.000173451 | 1.264302379  | 4.540421636 | 3.276119257 |
| <i>Stx11</i>      | 0.022844501 | 1.562325796  | 4.363121454 | 2.800795658 |
| <i>Stx11</i>      | 0.002417079 | 1.700076568  | 4.404842833 | 2.704766265 |
| <i>Stxbp5l</i>    | 0.031848918 | 1.159272061  | 3.742487144 | 2.583215083 |
| <i>Styx1l</i>     | 0.000113272 | -1.507137501 | 3.784535312 | 5.291672813 |
| <i>Sult6b2</i>    | 0.011234109 | 1.627822698  | 3.388856366 | 1.761033668 |
| <i>Susd1</i>      | 4.40E-06    | 1.184533955  | 5.620403052 | 4.435869097 |
| <i>Susd4</i>      | 0.012500085 | 1.626890088  | 4.200468155 | 2.573578066 |
| <i>Susd4</i>      | 0.013692123 | 1.713232058  | 4.475910149 | 2.762678091 |
| <i>Susd4</i>      | 0.040645356 | 1.239363842  | 3.958642336 | 2.719278494 |
| <i>Svs2</i>       | 0.000170178 | 5.838467137  | 15.71286308 | 9.874395943 |
| <i>Svs4</i>       | 0.000449612 | 5.684534112  | 12.88424568 | 7.199711566 |
| <i>Svs5</i>       | 0.000293913 | 5.544214962  | 13.89050368 | 8.346288722 |
| <i>Sybu</i>       | 0.005935665 | -1.325164075 | 4.23614586  | 5.561309935 |
| <i>Sybu</i>       | 0.028086737 | -1.0597673   | 4.481473817 | 5.541241116 |
| <i>Sybu</i>       | 0.000536159 | -1.127391584 | 4.472207912 | 5.599599497 |
| <i>Sybu</i>       | 0.000137619 | -1.256526463 | 4.34663048  | 5.603156943 |
| <i>Sybu</i>       | 0.003938225 | -1.08666878  | 4.342980386 | 5.429649167 |
| <i>Sybu</i>       | 0.000641702 | -1.452954622 | 4.170048354 | 5.623002976 |
| <i>Sybu</i>       | 0.000922709 | -1.132546858 | 4.492657748 | 5.625204606 |
| <i>Sybu</i>       | 0.003540023 | -1.023631996 | 4.48435745  | 5.507989446 |
| <i>Sybu</i>       | 0.002076373 | -1.139440119 | 4.389788112 | 5.529228232 |
| <i>Syce1</i>      | 7.03E-05    | 1.009193573  | 6.774788526 | 5.765594953 |

|                 |             |              |             |             |
|-----------------|-------------|--------------|-------------|-------------|
| <i>Syk</i>      | 0.000442731 | 1.032036561  | 6.148298012 | 5.116261451 |
| <i>Syk</i>      | 0.000112628 | 1.374318344  | 6.032380755 | 4.658062411 |
| <i>Syk</i>      | 7.15E-05    | 1.059570021  | 6.12868592  | 5.069115899 |
| <i>Syk</i>      | 0.000148757 | 1.130332371  | 6.091096264 | 4.960763893 |
| <i>Syngnr1</i>  | 0.003292435 | 1.255508401  | 5.807745661 | 4.55223726  |
| <i>Syt14</i>    | 0.014203218 | -1.050790288 | 2.641842417 | 3.692632705 |
| <i>Syt2</i>     | 8.38E-06    | 1.13961167   | 8.710674552 | 7.571062882 |
| <i>Syt8</i>     | 0.002583447 | 1.297340192  | 4.441573425 | 3.144233233 |
| <i>Syt8</i>     | 0.000484461 | 1.650461064  | 4.534685531 | 2.884224466 |
| <i>Syt8</i>     | 0.009805915 | 1.311959533  | 4.279624992 | 2.967665459 |
| <i>Syt8</i>     | 0.013393952 | 1.175327067  | 4.225025628 | 3.049698561 |
| <i>Syt8</i>     | 0.007425081 | 2.073411199  | 3.665526024 | 1.592114825 |
| <i>Syt8</i>     | 0.019030361 | 1.850508124  | 4.545993894 | 2.69548577  |
| <i>Syt8</i>     | 0.004417349 | 1.272628471  | 4.121502342 | 2.848873871 |
| <i>Syt8</i>     | 0.028191213 | 1.354819732  | 4.359783294 | 3.004963562 |
| <i>Syt8</i>     | 0.015253349 | 1.747850861  | 4.145727619 | 2.397876757 |
| <i>Syt8</i>     | 2.94E-05    | 1.61953962   | 4.571372206 | 2.951832586 |
| <i>Syt8</i>     | 0.003977795 | 1.675178235  | 4.427289052 | 2.752110817 |
| <i>Sytl3</i>    | 1.38E-05    | -1.05200521  | 5.98240963  | 7.03441484  |
| <i>Sytl5</i>    | 0.000710057 | 1.000104807  | 5.966941408 | 4.966836601 |
| <i>Sytl5</i>    | 0.000657863 | 1.014359849  | 5.968810133 | 4.954450284 |
| <i>Tacstd2</i>  | 2.65E-06    | 3.891602145  | 8.005527479 | 4.113925334 |
| <i>Taf7l</i>    | 0.005362799 | -1.741012302 | 1.807198567 | 3.54821087  |
| <i>Tagln2</i>   | 1.94E-05    | 1.002240219  | 10.05585517 | 9.053614947 |
| <i>Tarbp2</i>   | 3.05E-06    | 1.047345319  | 11.69151481 | 10.64416949 |
| <i>Tars2</i>    | 0.029966351 | 1.22769861   | 3.69073177  | 2.46303316  |
| <i>Tasp1</i>    | 5.44E-05    | -1.034012289 | 4.940103227 | 5.974115516 |
| <i>Tasp1</i>    | 1.42E-05    | -1.043282091 | 5.246280717 | 6.289562808 |
| <i>Tasp1</i>    | 8.85E-07    | -1.0227339   | 5.057436457 | 6.080170357 |
| <i>Tasp1</i>    | 8.76E-05    | -1.04947786  | 5.125519065 | 6.174996925 |
| <i>Tbata</i>    | 0.00309987  | -1.315770638 | 3.446596427 | 4.762367065 |
| <i>Tbc1d10c</i> | 0.000539416 | 1.141411772  | 4.760714561 | 3.619302789 |
| <i>Tbc1d10c</i> | 0.003051166 | 1.09668959   | 4.686605394 | 3.589915804 |
| <i>Tbc1d2b</i>  | 0.000660027 | 1.119600931  | 6.165597619 | 5.045996689 |
| <i>Tcerg1</i>   | 0.000113731 | 1.150013751  | 6.513325493 | 5.363311742 |
| <i>Tcp1111</i>  | 0.000137636 | 1.012202724  | 6.360729876 | 5.348527152 |
| <i>Tdpoz2</i>   | 0.000126868 | -1.514557062 | 6.174832446 | 7.689389508 |
| <i>Tdpoz2</i>   | 1.65E-06    | -1.54851901  | 6.182505832 | 7.731024842 |
| <i>Tead4</i>    | 0.00029445  | 2.194295543  | 3.861083144 | 1.666787601 |
| <i>Tecta</i>    | 0.01149658  | -1.284031197 | 2.903536885 | 4.187568082 |
| <i>Terf2</i>    | 0.000674127 | -1.510689266 | 2.947706762 | 4.458396028 |
| <i>Tet1</i>     | 0.001412078 | -1.319947669 | 4.13164815  | 5.451595819 |
| <i>Tet1</i>     | 0.000157651 | -1.081146266 | 4.231143995 | 5.312290261 |
| <i>Tet1</i>     | 0.000106959 | -1.050935519 | 4.266497056 | 5.317432576 |
| <i>Tet1</i>     | 0.001059116 | -1.224012417 | 4.246194571 | 5.470206988 |
| <i>Tex14</i>    | 0.00849963  | -1.903281549 | 1.8744426   | 3.777724149 |

|                |             |              |             |             |
|----------------|-------------|--------------|-------------|-------------|
| <i>Tex14</i>   | 0.000185786 | -1.598072471 | 2.565782231 | 4.163854702 |
| <i>Tex14</i>   | 0.016479387 | -1.669097094 | 1.812773586 | 3.481870679 |
| <i>Tex35</i>   | 0.000165488 | -2.034943456 | 1.407659726 | 3.442603182 |
| <i>Tfcp2l1</i> | 0.004182286 | 1.006749633  | 7.254341395 | 6.247591762 |
| <i>Tfec</i>    | 0.00215299  | -1.047451021 | 3.929603081 | 4.977054102 |
| <i>Tgfb1</i>   | 2.52E-05    | 1.206884468  | 7.295261381 | 6.088376914 |
| <i>Tgfb1</i>   | 0.000254854 | 1.0970691    | 7.831370284 | 6.734301184 |
| <i>Tgtp2</i>   | 1.09E-05    | 1.119792833  | 4.825581519 | 3.705788685 |
| <i>Thbs1</i>   | 1.28E-05    | 1.764991541  | 8.433747805 | 6.668756264 |
| <i>Thbs1</i>   | 5.49E-06    | 1.643594258  | 8.405952817 | 6.762358559 |
| <i>Themis2</i> | 0.043909716 | 1.217328721  | 4.20332701  | 2.985998288 |
| <i>Tifa</i>    | 4.67E-06    | 1.829201029  | 5.761296933 | 3.932095905 |
| <i>Tifa</i>    | 2.50E-05    | 1.361041608  | 5.552364822 | 4.191323215 |
| <i>Tifa</i>    | 1.55E-06    | 1.68435436   | 5.546408025 | 3.862053665 |
| <i>Tifa</i>    | 0.000210376 | 1.836513296  | 5.824193819 | 3.987680523 |
| <i>Tifa</i>    | 6.44E-05    | 1.391975034  | 5.509105274 | 4.11713024  |
| <i>Tifab</i>   | 0.027725969 | 1.176152284  | 3.30586978  | 2.129717496 |
| <i>Tifab</i>   | 0.001236241 | 1.857784104  | 3.587459268 | 1.729675163 |
| <i>Timp1</i>   | 1.22E-06    | 2.502555024  | 8.444094526 | 5.941539502 |
| <i>Timp1</i>   | 3.67E-06    | 2.29570831   | 8.820744818 | 6.525036508 |
| <i>Timp1</i>   | 9.65E-08    | 2.611693066  | 8.478932269 | 5.867239203 |
| <i>Timp4</i>   | 0.019383319 | 1.111108067  | 4.804697858 | 3.693589791 |
| <i>Tlr1</i>    | 0.003444729 | 1.721100623  | 4.990516589 | 3.269415966 |
| <i>Tlr1</i>    | 0.000847671 | 1.593227586  | 4.853719672 | 3.260492085 |
| <i>Tlr1</i>    | 0.000222794 | 1.893927353  | 4.897592047 | 3.003664694 |
| <i>Tlr1</i>    | 0.001731994 | 1.872063723  | 4.919082156 | 3.047018433 |
| <i>Tlr1</i>    | 0.000712806 | 1.6194311    | 4.935006387 | 3.315575287 |
| <i>Tlr13</i>   | 0.001553434 | 1.255121127  | 5.04349961  | 3.788378483 |
| <i>Tlr2</i>    | 5.35E-05    | 1.320276232  | 5.777549396 | 4.457273164 |
| <i>Tlr2</i>    | 8.09E-05    | 1.005517133  | 5.672860747 | 4.667343614 |
| <i>Tlr7</i>    | 0.000329516 | 1.164206612  | 6.344924431 | 5.180717819 |
| <i>Tlr7</i>    | 0.000144713 | 1.084220849  | 6.418566205 | 5.334345356 |
| <i>Tlr7</i>    | 0.000437315 | 1.195276201  | 6.372595528 | 5.177319327 |
| <i>Tlr7</i>    | 0.000117861 | 1.112654318  | 6.232680946 | 5.120026628 |
| <i>Tlr7</i>    | 5.39E-05    | 1.27970932   | 6.302245408 | 5.022536088 |
| <i>Tlr8</i>    | 0.001690129 | 1.803350159  | 4.223841094 | 2.420490935 |
| <i>Tlr8</i>    | 0.000903829 | 2.044819325  | 4.187554068 | 2.142734743 |
| <i>Tlr8</i>    | 0.004558936 | 1.869959617  | 4.594501073 | 2.724541457 |
| <i>Tlr8</i>    | 0.000244688 | 2.897702059  | 4.48225293  | 1.584550871 |
| <i>Tlr9</i>    | 0.00012959  | 1.094954386  | 5.637628437 | 4.542674051 |
| <i>Tm6sf1</i>  | 5.73E-07    | 1.10154368   | 7.311894446 | 6.210350766 |
| <i>Tm6sf1</i>  | 3.22E-05    | 1.364741451  | 6.510484503 | 5.145743052 |
| <i>Tm6sf1</i>  | 8.02E-06    | 1.645846539  | 6.171449458 | 4.525602919 |
| <i>Tm6sf1</i>  | 2.36E-06    | 1.083190646  | 7.212803582 | 6.129612936 |
| <i>Tm6sf1</i>  | 1.74E-05    | 1.290645798  | 6.238575928 | 4.94793013  |
| <i>Tmcc1</i>   | 3.00E-05    | -1.002658086 | 5.287750723 | 6.290408809 |

|                  |             |              |             |             |
|------------------|-------------|--------------|-------------|-------------|
| <i>Tmeff2</i>    | 0.002530667 | 1.105378356  | 4.443036448 | 3.337658092 |
| <i>Tmem108</i>   | 0.025128348 | -1.343330249 | 2.149130434 | 3.492460684 |
| <i>Tmem116</i>   | 1.46E-06    | 1.034626155  | 7.483626986 | 6.449000831 |
| <i>Tmem119</i>   | 8.46E-05    | 1.041052124  | 6.46595863  | 5.424906506 |
| <i>Tmem139</i>   | 0.004226482 | 1.029777147  | 4.658105225 | 3.628328077 |
| <i>Tmem139</i>   | 0.001241673 | 1.381149482  | 4.565845953 | 3.184696471 |
| <i>Tmem167</i>   | 5.36E-06    | -1.154204089 | 6.580290145 | 7.734494235 |
| <i>Tmem229b</i>  | 0.00011272  | 1.036901197  | 6.122866865 | 5.085965668 |
| <i>Tmem260</i>   | 1.56E-05    | -1.352434412 | 3.950305505 | 5.302739916 |
| <i>Tmem266</i>   | 0.046388283 | -1.789658495 | 1.983358077 | 3.773016572 |
| <i>Tmem266</i>   | 0.013674315 | -1.155282112 | 3.327328969 | 4.482611081 |
| <i>Tmem40</i>    | 9.06E-05    | 1.001076656  | 5.031275237 | 4.030198581 |
| <i>Tmem52b</i>   | 0.004090245 | -1.083958659 | 3.668897186 | 4.752855845 |
| <i>Tmprss4</i>   | 0.001310576 | 2.900714022  | 4.542887677 | 1.642173655 |
| <i>Tmprss4</i>   | 3.96E-08    | 3.852415175  | 4.722784122 | 0.870368947 |
| <i>Tnc</i>       | 0.008051983 | 1.415127826  | 5.839497917 | 4.424370091 |
| <i>Tnc</i>       | 0.000884815 | 1.286978762  | 7.821494393 | 6.534515631 |
| <i>Tnc</i>       | 0.011710553 | 1.355816564  | 5.964825964 | 4.609009401 |
| <i>Tnc</i>       | 0.004105424 | 1.218599446  | 5.987039663 | 4.768440217 |
| <i>Tnc</i>       | 0.000449318 | 1.497714817  | 7.835698592 | 6.337983776 |
| <i>Tnf</i>       | 0.000117782 | 1.116328942  | 4.822757221 | 3.706428279 |
| <i>Tnf</i>       | 0.001677687 | 1.235854254  | 4.995296699 | 3.759442445 |
| <i>Tnfaip2</i>   | 2.35E-05    | 1.931442649  | 4.60640772  | 2.674965071 |
| <i>Tnfaip2</i>   | 0.001802476 | 1.526650918  | 4.56913854  | 3.042487622 |
| <i>Tnfaip2</i>   | 2.45E-05    | 2.150193599  | 5.646972729 | 3.49677913  |
| <i>Tnfaip3</i>   | 0.000106838 | 1.657934927  | 5.592048368 | 3.934113441 |
| <i>Tnfaip3</i>   | 0.004791311 | 2.153523382  | 5.642241066 | 3.488717684 |
| <i>Tnfaip3</i>   | 0.000181307 | 1.91968098   | 5.678303722 | 3.758622742 |
| <i>Tnfrsf10b</i> | 2.16E-05    | 1.045080387  | 4.782361238 | 3.737280852 |
| <i>Tnfrsf11b</i> | 2.98E-05    | 1.63549922   | 5.599755221 | 3.964256    |
| <i>Tnfrsf13b</i> | 0.000210261 | 1.003330859  | 5.82939089  | 4.826060031 |
| <i>Tnfrsf13c</i> | 0.005002841 | -1.164537154 | 2.529788533 | 3.694325688 |
| <i>Tnfrsf14</i>  | 0.000311172 | 1.053657278  | 5.326660509 | 4.273003231 |
| <i>Tnfrsf21</i>  | 0.000343259 | 1.065621382  | 7.663866914 | 6.598245532 |
| <i>Tnfrsf23</i>  | 0.005757726 | 1.043305999  | 4.975713074 | 3.932407076 |
| <i>Tnfrsf23</i>  | 0.003435133 | 1.006800827  | 4.683552213 | 3.676751387 |
| <i>Tnfsf10</i>   | 0.000167753 | 2.919185491  | 5.566327768 | 2.647142277 |
| <i>Tnip3</i>     | 3.95E-05    | 2.543689916  | 3.51584922  | 0.972159303 |
| <i>Tnni1</i>     | 4.23E-05    | 1.345189884  | 8.624010815 | 7.278820931 |
| <i>Tnp1</i>      | 9.48E-07    | -5.605612988 | 1.122582445 | 6.728195433 |
| <i>Tnp2</i>      | 2.27E-11    | -4.560578663 | 1.079834079 | 5.640412742 |
| <i>Top2a</i>     | 8.93E-06    | 1.448969304  | 6.59709678  | 5.148127476 |
| <i>Top2a</i>     | 4.84E-06    | 1.341953178  | 6.545043645 | 5.203090466 |
| <i>Tpx2</i>      | 0.022099712 | 1.619082709  | 4.108437882 | 2.489355173 |
| <i>Tpx2</i>      | 0.004440554 | 1.234837404  | 4.124650912 | 2.889813507 |
| <i>Tpx2</i>      | 6.99E-05    | 1.811651334  | 4.626624545 | 2.814973212 |

|                 |             |              |             |             |
|-----------------|-------------|--------------|-------------|-------------|
| <i>Trappc9</i>  | 8.68E-08    | -1.474774666 | 6.596745182 | 8.071519848 |
| <i>Trdmt1</i>   | 0.010888822 | -1.094748894 | 3.346923739 | 4.441672633 |
| <i>Trem2</i>    | 8.60E-06    | 2.157241718  | 7.181623878 | 5.02438216  |
| <i>Trem2</i>    | 0.00012025  | 2.171403909  | 7.0805257   | 4.90912179  |
| <i>Trem2</i>    | 1.80E-05    | 2.048435664  | 7.223884432 | 5.175448767 |
| <i>Trem2</i>    | 1.53E-05    | 2.334678294  | 7.315951285 | 4.981272991 |
| <i>Trem12</i>   | 0.000581237 | 1.411852204  | 8.413278998 | 7.001426794 |
| <i>Trem12</i>   | 0.001015333 | 1.327398032  | 8.373731882 | 7.04633385  |
| <i>Trf</i>      | 0.000108169 | 1.529423559  | 8.820328993 | 7.290905434 |
| <i>Trim10</i>   | 0.008125826 | -1.45157289  | 2.162326161 | 3.613899051 |
| <i>Trim29</i>   | 0.000806012 | 1.636997189  | 4.282046342 | 2.645049153 |
| <i>Trim29</i>   | 0.001386291 | 1.079919272  | 4.351773556 | 3.271854284 |
| <i>Trim30a</i>  | 4.28E-06    | 1.339007558  | 5.772587952 | 4.433580393 |
| <i>Trim30a</i>  | 0.000216773 | 1.42933858   | 5.805992119 | 4.37665354  |
| <i>Trim36</i>   | 0.024493051 | 1.189339718  | 3.51493357  | 2.325593852 |
| <i>Trim66</i>   | 0.030225717 | -1.408855407 | 2.708252476 | 4.117107882 |
| <i>Trim7</i>    | 4.69E-06    | 1.141958595  | 9.256136544 | 8.11417795  |
| <i>Trim7</i>    | 5.71E-06    | 1.1323998    | 9.496829214 | 8.364429415 |
| <i>Trim7</i>    | 2.53E-05    | 1.174032572  | 9.507731199 | 8.333698626 |
| <i>Troap</i>    | 0.011264215 | 1.380722126  | 4.278561341 | 2.897839214 |
| <i>Trp53bp1</i> | 0.003994054 | 1.212357306  | 9.83562971  | 8.623272404 |
| <i>Trp53bp1</i> | 0.002838504 | 1.136137647  | 9.805434347 | 8.6692967   |
| <i>Trp53bp1</i> | 0.003244353 | 1.215727845  | 9.810274997 | 8.594547152 |
| <i>Trpm3</i>    | 0.001146378 | -1.501353626 | 3.271583996 | 4.772937623 |
| <i>Trpv6</i>    | 0.014356289 | 2.772705445  | 4.223395164 | 1.450689719 |
| <i>Tsc22d3</i>  | 5.72E-05    | 1.087371086  | 8.780591325 | 7.693220238 |
| <i>Tsga13</i>   | 0.005245062 | -1.164624748 | 3.108257159 | 4.272881907 |
| <i>Tspear</i>   | 0.000870897 | -1.126849783 | 3.417595527 | 4.544445311 |
| <i>Tspyl4</i>   | 0.000159655 | -1.062623588 | 7.640162199 | 8.702785788 |
| <i>Tssk1</i>    | 2.40E-05    | 1.967690425  | 10.01369907 | 8.046008645 |
| <i>Tssk1</i>    | 0.000283931 | 1.052298901  | 9.753664192 | 8.701365291 |
| <i>Ttyh2</i>    | 6.39E-06    | -1.137658839 | 7.207860672 | 8.34551951  |
| <i>Tuba3b</i>   | 1.73E-06    | -2.015446556 | 4.491214965 | 6.50666152  |
| <i>Tuba3b</i>   | 1.05E-07    | -2.058189586 | 4.547062492 | 6.605252078 |
| <i>Txndc2</i>   | 0.001116054 | -2.289536802 | 1.922552027 | 4.212088829 |
| <i>Tyms</i>     | 9.25E-08    | -1.011274422 | 6.174579756 | 7.185854178 |
| <i>Tyms</i>     | 9.83E-07    | -1.074500516 | 6.160216303 | 7.234716819 |
| <i>Tyms</i>     | 3.12E-06    | -1.016633747 | 6.191820944 | 7.20845469  |
| <i>Tyrobp</i>   | 1.39E-05    | 1.664590085  | 8.915932665 | 7.251342581 |
| <i>Uaca</i>     | 0.00060394  | -1.025979073 | 5.756317477 | 6.78229655  |
| <i>Ubd</i>      | 9.57E-05    | 2.364417495  | 3.435805045 | 1.07138755  |
| <i>Ubd</i>      | 1.26E-06    | 2.432609983  | 3.367830868 | 0.935220885 |
| <i>Ube2c</i>    | 9.17E-06    | 1.83230503   | 7.144776892 | 5.312471862 |
| <i>Ufl1</i>     | 3.13E-06    | -1.160799981 | 8.736079785 | 9.896879767 |
| <i>Ugt2b34</i>  | 3.39E-05    | 1.534698306  | 5.072670372 | 3.537972067 |
| <i>Uhrf1</i>    | 0.002139468 | 1.170133853  | 4.166433005 | 2.996299152 |



|                 |             |              |             |             |
|-----------------|-------------|--------------|-------------|-------------|
| <i>Uhrf1</i>    | 0.00571289  | 1.34790345   | 3.922270843 | 2.574367393 |
| <i>Uhrf1</i>    | 0.008105818 | 1.394005147  | 4.132746712 | 2.738741565 |
| <i>Ulbp1</i>    | 0.003425177 | 1.845651468  | 4.178059173 | 2.332407704 |
| <i>Ulbp1</i>    | 2.42E-05    | 1.527544923  | 3.522238416 | 1.994693492 |
| <i>Ulbp1</i>    | 8.43E-05    | 1.422415229  | 3.301141446 | 1.878726217 |
| <i>Unc13d</i>   | 0.005926683 | 2.14568522   | 3.958295267 | 1.812610047 |
| <i>Unc5cl</i>   | 6.84E-05    | -1.275715061 | 3.730401557 | 5.006116617 |
| <i>Unc79</i>    | 0.047643994 | 1.76007437   | 3.533205439 | 1.773131069 |
| <i>Unc79</i>    | 0.018903535 | 2.410049971  | 3.719554917 | 1.309504946 |
| <i>Unc79</i>    | 0.014507031 | 1.113199819  | 6.12983586  | 5.016636041 |
| <i>Uqcr10</i>   | 0.000152759 | -2.302343405 | 5.643093758 | 7.945437162 |
| <i>Uroc1</i>    | 6.92E-06    | -1.772754573 | 2.181430978 | 3.95418555  |
| <i>Uroc1</i>    | 0.016152587 | -1.036836247 | 2.912794736 | 3.949630983 |
| <i>Usp18</i>    | 4.30E-05    | 1.656422067  | 7.353595818 | 5.697173751 |
| <i>Usp40</i>    | 2.15E-05    | 1.079236034  | 8.126750815 | 7.047514781 |
| <i>Usp40</i>    | 6.99E-05    | 1.019368363  | 7.891142285 | 6.871773922 |
| <i>Vav1</i>     | 0.001854198 | 1.943589809  | 5.339953308 | 3.396363499 |
| <i>Vav1</i>     | 7.81E-06    | 1.395237307  | 9.287670127 | 7.89243282  |
| <i>Vav1</i>     | 0.002927991 | 2.316005014  | 5.175084827 | 2.859079812 |
| <i>Vav1</i>     | 1.99E-05    | 1.289551669  | 9.136637066 | 7.847085397 |
| <i>Vcan</i>     | 0.001644907 | 1.162839898  | 5.397876052 | 4.235036153 |
| <i>Vill</i>     | 0.000241982 | 2.040581715  | 5.504733977 | 3.464152262 |
| <i>Vill</i>     | 7.13E-05    | 3.58534575   | 5.034182519 | 1.448836769 |
| <i>Vill</i>     | 2.03E-07    | 3.57612563   | 4.788363085 | 1.212237455 |
| <i>Vill</i>     | 1.03E-05    | 2.236484967  | 5.59999197  | 3.363507002 |
| <i>Vill</i>     | 0.00017429  | 3.105344755  | 5.030191524 | 1.924846769 |
| <i>Vill</i>     | 2.96E-05    | 3.472436061  | 4.57006554  | 1.09762948  |
| <i>Vill</i>     | 0.001266367 | 2.52381431   | 4.790654849 | 2.266840538 |
| <i>Vill</i>     | 7.61E-06    | 3.389115368  | 4.930767771 | 1.541652403 |
| <i>Vill</i>     | 5.85E-05    | 3.203934865  | 5.105562127 | 1.901627262 |
| <i>Vill</i>     | 3.22E-05    | 1.85401086   | 5.689385952 | 3.835375093 |
| <i>Vim</i>      | 2.41E-06    | 1.380904275  | 11.62352905 | 10.24262477 |
| <i>Vipr2</i>    | 0.008561456 | -1.06878183  | 2.661632607 | 3.730414438 |
| <i>Vmn1r199</i> | 0.032335558 | 1.049537286  | 3.80346595  | 2.753928665 |
| <i>Vmn1r212</i> | 0.001063151 | -1.076675874 | 3.88770582  | 4.964381694 |
| <i>Vmn1r66</i>  | 0.006741164 | -2.041232304 | 1.905070916 | 3.94630322  |
| <i>Vmn2r120</i> | 0.007328496 | 1.47233256   | 4.600960303 | 3.128627743 |
| <i>Vps39</i>    | 0.003677528 | -1.401769196 | 4.388211208 | 5.789980403 |
| <i>Vsir</i>     | 0.000249067 | 1.303678103  | 7.377420183 | 6.07374208  |
| <i>Vtcn1</i>    | 2.16E-07    | 3.513040679  | 7.653350071 | 4.140309392 |
| <i>Was</i>      | 0.001538698 | 1.605516009  | 4.383835499 | 2.77831949  |
| <i>Wbscr27</i>  | 1.54E-05    | -1.783072495 | 5.634441646 | 7.417514141 |
| <i>Wbscr27</i>  | 0.000204239 | -1.509510846 | 5.923151852 | 7.432662698 |
| <i>Wbscr27</i>  | 3.40E-05    | -1.34527232  | 6.045486911 | 7.390759231 |
| <i>Wbscr27</i>  | 0.000411566 | -1.436686516 | 5.704998339 | 7.141684855 |
| <i>Wbscr27</i>  | 7.75E-05    | -1.706493288 | 5.850870697 | 7.557363985 |

|                |             |              |             |             |
|----------------|-------------|--------------|-------------|-------------|
| <i>Wbscr27</i> | 0.000583788 | -1.520348625 | 5.675154138 | 7.195502763 |
| <i>Wbscr27</i> | 0.000192496 | -1.672006744 | 5.698071857 | 7.3700786   |
| <i>Wbscr27</i> | 3.03E-05    | -1.521029108 | 5.859331287 | 7.380360396 |
| <i>Wbscr27</i> | 6.07E-05    | -1.448676555 | 5.874557973 | 7.323234528 |
| <i>Wbscr27</i> | 2.74E-05    | -1.503995548 | 5.82894146  | 7.332937007 |
| <i>Wbscr27</i> | 0.000164134 | -1.238878777 | 6.095282341 | 7.334161117 |
| <i>Wbscr27</i> | 0.000346776 | -1.688420893 | 5.706611043 | 7.395031935 |
| <i>Wbscr27</i> | 0.000480168 | -1.464927217 | 5.808561689 | 7.273488906 |
| <i>Wbscr27</i> | 5.93E-05    | -1.590148644 | 5.795557349 | 7.385705993 |
| <i>Wdfy4</i>   | 9.03E-05    | 1.326720696  | 5.583057057 | 4.256336361 |
| <i>Wdfy4</i>   | 0.000167164 | 1.629232184  | 5.569537956 | 3.940305772 |
| <i>Wdfy4</i>   | 0.000317825 | 1.464313552  | 5.759161714 | 4.294848162 |
| <i>Wdfy4</i>   | 0.000147552 | 1.57648143   | 5.526257589 | 3.949776159 |
| <i>Wdfy4</i>   | 0.000168231 | 1.42865455   | 5.558022497 | 4.129367947 |
| <i>Wdfy4</i>   | 6.02E-05    | 1.579735774  | 5.797128481 | 4.217392707 |
| <i>Wdr27</i>   | 6.59E-05    | 1.061360421  | 7.189889252 | 6.128528831 |
| <i>Wdr86</i>   | 0.001002733 | -1.409431134 | 2.434631242 | 3.844062376 |
| <i>Wdr86</i>   | 0.007185917 | -1.618441998 | 2.355538727 | 3.973980725 |
| <i>Wdr92</i>   | 0.00140299  | 2.18703258   | 14.50416706 | 12.31713448 |
| <i>Wfdc17</i>  | 0.000111769 | 1.1085393    | 8.828375529 | 7.719836229 |
| <i>Wfdc3</i>   | 0.021684647 | 1.667488572  | 3.798777701 | 2.131289129 |
| <i>Wfdc3</i>   | 9.86E-05    | 2.155477126  | 3.962865067 | 1.807387941 |
| <i>Wfdc3</i>   | 0.000318016 | 2.471791571  | 4.284918987 | 1.813127416 |
| <i>Wfdc3</i>   | 9.15E-05    | 2.737519723  | 4.0714208   | 1.333901076 |
| <i>Wnt4</i>    | 0.000341485 | 1.98563454   | 4.456020394 | 2.470385854 |
| <i>Wrb</i>     | 3.66E-05    | -1.062739275 | 5.3994322   | 6.462171476 |
| <i>Xaf1</i>    | 6.70E-05    | 1.178664523  | 6.968799174 | 5.790134651 |
| <i>Xaf1</i>    | 0.000102201 | 1.334172661  | 7.161866705 | 5.827694044 |
| <i>Xaf1</i>    | 7.96E-06    | 1.11520075   | 6.875437295 | 5.760236545 |
| <i>Xaf1</i>    | 3.67E-05    | 1.186497793  | 7.00855678  | 5.822058988 |
| <i>Xdh</i>     | 0.000334677 | 1.321207136  | 8.947180944 | 7.625973808 |
| <i>Xkr9</i>    | 0.00025724  | -2.015126944 | 1.546406118 | 3.561533062 |
| <i>Ybx2</i>    | 2.84E-05    | -3.346016712 | 3.03815808  | 6.384174792 |
| <i>Ybx2</i>    | 7.84E-07    | -3.043205145 | 3.268120257 | 6.311325403 |
| <i>Ybx2</i>    | 0.000160909 | -3.08153584  | 3.203954343 | 6.285490184 |
| <i>Ybx2</i>    | 0.000123055 | -2.969556502 | 3.475142559 | 6.444699061 |
| <i>Ybx2</i>    | 0.000114861 | -3.303478265 | 3.094670021 | 6.398148286 |
| <i>Zbp1</i>    | 6.79E-06    | 1.479349279  | 6.941852747 | 5.462503468 |
| <i>Zbtb46</i>  | 0.000520371 | 1.412751718  | 5.832094436 | 4.419342718 |
| <i>Zc3h12d</i> | 0.009052054 | 1.469791772  | 3.85246174  | 2.382669968 |
| <i>Zc3h12d</i> | 0.013088563 | 1.559911859  | 4.033890749 | 2.47397889  |
| <i>Zc3h12d</i> | 0.000288049 | 1.38438927   | 4.515352543 | 3.130963273 |
| <i>Zc3h6</i>   | 6.45E-05    | -1.040445724 | 5.823764073 | 6.864209797 |
| <i>Zcchc18</i> | 0.011187593 | 1.286866606  | 3.561709193 | 2.274842588 |
| <i>Zfand4</i>  | 0.000151314 | 1.370269222  | 7.930162153 | 6.559892932 |
| <i>Zfhx2</i>   | 4.23E-07    | 1.022683445  | 10.13613234 | 9.113448899 |

|         |             |              |             |             |
|---------|-------------|--------------|-------------|-------------|
| Zfhx2   | 6.69E-06    | 1.038390851  | 10.09047292 | 9.052082067 |
| Zfp119b | 0.000794238 | -1.651218451 | 2.386148746 | 4.037367197 |
| Zfp2    | 0.000982268 | 1.404962491  | 5.254766526 | 3.849804035 |
| Zfp2    | 0.012513862 | 1.21009554   | 4.794495667 | 3.584400128 |
| Zfp286  | 0.014253952 | -1.323458282 | 1.938960174 | 3.262418455 |
| Zfp292  | 0.000441461 | -1.218310279 | 4.078109235 | 5.296419514 |
| Zfp316  | 5.17E-05    | -1.460513419 | 3.649815413 | 5.110328832 |
| Zfp316  | 0.000217272 | -1.266807217 | 3.828290856 | 5.095098073 |
| Zfp346  | 9.29E-05    | -1.090663818 | 4.095591483 | 5.1862553   |
| Zfp40   | 0.017826544 | -1.004937848 | 4.671110427 | 5.676048275 |
| Zfp473  | 0.016778618 | 1.071069605  | 3.490807906 | 2.419738301 |
| Zfp473  | 0.010604445 | 1.121148843  | 4.073110754 | 2.951961911 |
| Zfp474  | 0.00237683  | 1.115245026  | 3.959052421 | 2.843807395 |
| Zfp532  | 0.000503302 | 1.136184514  | 6.481036203 | 5.344851689 |
| Zfp532  | 0.001867733 | 1.04352765   | 6.352131466 | 5.308603816 |
| Zfp532  | 0.000586613 | 1.056385395  | 6.48840809  | 5.432022695 |
| Zfp532  | 0.000169584 | 1.187748922  | 6.383544438 | 5.195795516 |
| Zfp532  | 0.000398341 | 1.081862265  | 6.41381533  | 5.331953065 |
| Zfp532  | 0.001436637 | 1.089901591  | 6.498269125 | 5.408367535 |
| Zfp532  | 0.002177944 | 1.032690519  | 6.292023391 | 5.259332872 |
| Zfp532  | 0.001472725 | 1.054546938  | 6.365570977 | 5.311024039 |
| Zfp532  | 1.88E-05    | 1.155028667  | 7.855249283 | 6.700220616 |
| Zfp532  | 2.21E-05    | 1.09308315   | 7.83624708  | 6.743163929 |
| Zfp532  | 0.000284526 | 1.134305299  | 6.528845542 | 5.394540244 |
| Zfp532  | 0.000680601 | 1.044683318  | 6.515319908 | 5.47063659  |
| Zfp57   | 0.000228246 | 1.065731495  | 5.334564363 | 4.268832868 |
| Zfp618  | 0.030653571 | -1.179152433 | 3.450852747 | 4.630005181 |
| Zfp618  | 0.000590361 | -1.035653122 | 3.297374921 | 4.333028042 |
| Zfp811  | 0.010599945 | 1.67527154   | 3.469280809 | 1.794009269 |
| Zfp819  | 0.001107773 | 1.674310648  | 4.513694431 | 2.839383783 |
| Zfp831  | 0.000785904 | -1.162587821 | 5.44164639  | 6.604234211 |
| Zfp90   | 1.38E-06    | 1.372987159  | 8.534981342 | 7.161994184 |
| Zfp93   | 8.72E-06    | -1.110095007 | 4.029281177 | 5.139376184 |
| Zfp93   | 3.23E-05    | -1.427388965 | 3.764859502 | 5.192248468 |
| Zfp941  | 1.17E-06    | -1.507434584 | 2.075695226 | 3.583129811 |
| Zfp945  | 0.01550379  | -1.503742503 | 1.986616574 | 3.490359077 |
| Zfp950  | 0.01570975  | 1.124770267  | 3.666285361 | 2.541515094 |
| Zgrf1   | 4.35E-05    | 1.23940178   | 5.675948811 | 4.436547031 |
| Zgrf1   | 0.000511006 | 1.080750024  | 5.637636008 | 4.556885984 |
| Zgrf1   | 0.012317657 | 1.13293135   | 4.832209336 | 3.699277986 |
| Zgrf1   | 0.002741799 | 1.163870025  | 4.972269906 | 3.808399881 |
| Zgrf1   | 5.95E-05    | 1.447031344  | 4.854157133 | 3.407125789 |
| Zgrf1   | 2.51E-05    | 1.273292476  | 5.700693924 | 4.427401448 |
| Zmynd15 | 0.000179842 | 1.402658217  | 5.155624996 | 3.752966778 |
| Zmynd15 | 0.000694847 | 1.333202157  | 5.189674684 | 3.856472527 |
| Zmynd15 | 0.003287247 | 1.002735508  | 4.98374204  | 3.981006532 |

|                |             |             |             |             |
|----------------|-------------|-------------|-------------|-------------|
| <i>Zmynd15</i> | 0.00079031  | 1.316848643 | 5.273267593 | 3.956418951 |
| <i>Zmynd15</i> | 3.70E-05    | 1.602205188 | 5.172227169 | 3.570021981 |
| <i>Zmynd15</i> | 0.000139613 | 1.169040008 | 6.289916529 | 5.120876522 |
| <i>Zscan5b</i> | 0.011427448 | 2.238065182 | 4.601033413 | 2.362968231 |
| <i>Zscan5b</i> | 0.000569548 | 1.9075127   | 4.670816772 | 2.763304072 |

---

lncRNA, long non-coding RNA; FC, fold change; P vs. C, chronic non-bacteria prostatitis vs. control

**Supplementary Table S6. Differentially expressed long non-coding RNAs (lncRNAs) between prostate tissues derived from chronic non-bacteria prostatitis and negative controls.**

| GeneSymbol    | P-value (P_vs_C) | log2FC (P_vs_C) | Regulation (P_vs_C) | Case_mean (P_vs_C) | Control_mean (P_vs_C) |
|---------------|------------------|-----------------|---------------------|--------------------|-----------------------|
| 1110002O04Rik | 0.00017458       | -1.915493901    | down                | 3.138809923        | 5.054303824           |
| 1110002O04Rik | 0.00085096       | -1.717223489    | down                | 2.997298734        | 4.714522223           |
| 1700018L02Rik | 0.000449484      | -1.113831762    | down                | 4.943467405        | 6.057299167           |
| 1700027J07Rik | 1.75E-06         | -1.114443942    | down                | 3.884412232        | 4.998856175           |
| 1700028B04Rik | 6.00E-05         | -1.768168428    | down                | 5.805301136        | 7.573469564           |
| 1700028D13Rik | 0.001568241      | -1.360997524    | down                | 2.581905909        | 3.942903434           |
| 1700062C10Rik | 1.56E-07         | -1.179832725    | down                | 8.155461291        | 9.335294016           |
| 1700080G11Rik | 7.38E-06         | 1.239446737     | up                  | 6.59807504         | 5.358628303           |
| 1700081B01Rik | 0.000968336      | -2.034480368    | down                | 2.002189385        | 4.036669753           |
| 1700081B01Rik | 0.00299068       | -2.11403025     | down                | 1.484656577        | 3.598686827           |
| 1700086P04Rik | 0.00098862       | -1.174310337    | down                | 2.463031222        | 3.637341559           |
| 1700095B10Rik | 1.49E-05         | 1.017947579     | up                  | 9.124110539        | 8.10616296            |
| 1700102H20Rik | 8.29E-07         | -1.116888126    | down                | 6.452048996        | 7.568937122           |
| 1700112N08Rik | 0.000216954      | 1.353471931     | up                  | 6.582554639        | 5.229082708           |
| 2010203P06Rik | 0.003948462      | 1.843015165     | up                  | 3.944706781        | 2.101691617           |
| 2010204K13Rik | 0.00143618       | -1.370852158    | down                | 3.143855644        | 4.514707801           |
| 2210414B05Rik | 0.000914491      | -1.333079357    | down                | 3.068210557        | 4.401289914           |
| 2310043O21Rik | 3.36E-05         | 1.037804576     | up                  | 7.748027282        | 6.710222707           |
| 2610027F03Rik | 0.001165634      | -2.016924619    | down                | 1.53876833         | 3.555692949           |
| 2810039B14Rik | 0.006103015      | -1.7245577      | down                | 3.336956502        | 5.061514202           |
| 2900079G21Rik | 1.94E-05         | -1.218267526    | down                | 4.508249839        | 5.726517365           |
| 4732471J01Rik | 2.58E-05         | -1.097645012    | down                | 5.344468535        | 6.442113547           |
| 4833427F10Rik | 0.00034822       | -1.231361982    | down                | 5.583052374        | 6.814414356           |
| 4833427F10Rik | 9.54E-06         | -1.188307226    | down                | 5.675265713        | 6.863572939           |
| 4833427F10Rik | 8.69E-05         | -1.042109215    | down                | 5.862115896        | 6.904225111           |
| 4930402F11Rik | 1.75E-05         | 1.464755833     | up                  | 8.540064214        | 7.075308381           |
| 4930405L22Rik | 1.27E-05         | -1.032062706    | down                | 4.30912058         | 5.341183285           |
| 4930406D18Rik | 0.021680458      | -1.435064223    | down                | 1.945066374        | 3.380130596           |
| 4930417H01Rik | 0.000185723      | 1.301569874     | up                  | 4.872507551        | 3.570937676           |
| 4930417H01Rik | 0.001803694      | 1.231798792     | up                  | 3.984535006        | 2.752736214           |
| 4930428E07Rik | 0.000400691      | -1.681019595    | down                | 2.593788971        | 4.274808565           |
| 4930432J09Rik | 2.05E-06         | 1.420658798     | up                  | 8.266568309        | 6.845909511           |
| 4930434B07Rik | 0.000250123      | -1.248171943    | down                | 3.157348163        | 4.405520106           |
| 4930438E09Rik | 0.000946204      | -1.597487843    | down                | 3.557051719        | 5.154539562           |
| 4930448K20Rik | 0.000838482      | -1.069015379    | down                | 4.345683703        | 5.414699082           |
| 4930449C09Rik | 0.010467067      | -1.165536898    | down                | 3.455446465        | 4.620983364           |
| 4930465K10Rik | 0.000274146      | -1.609590064    | down                | 2.354247521        | 3.963837584           |
| 4930483K19Rik | 0.000269757      | -1.433882804    | down                | 4.457692827        | 5.891575631           |
| 4930487D11Rik | 0.000741713      | -1.427441159    | down                | 4.192472403        | 5.619913562           |
| 4930512J16Rik | 1.36E-05         | 1.16296432      | up                  | 8.946816005        | 7.783851685           |
| 4930533B01Rik | 0.001807776      | -1.138134189    | down                | 5.050335541        | 6.18846973            |
| 4930546K05Rik | 0.000745666      | -1.396292313    | down                | 3.53159708         | 4.927889393           |
| 4930562F17Rik | 0.000776233      | -1.348283247    | down                | 3.917538549        | 5.265821795           |
| 4930570E03Rik | 0.014430563      | -1.170226067    | down                | 4.067788468        | 5.238014535           |
| 4930572G02Rik | 0.036089789      | -1.435847083    | down                | 3.225445854        | 4.661292937           |
| 4933400A11Rik | 0.000128406      | -1.638624314    | down                | 2.503711219        | 4.142335533           |
| 4933431J24Rik | 0.020591803      | -1.132123466    | down                | 2.633412015        | 3.765535481           |
| 4933436H12Rik | 0.002344931      | 1.156775599     | up                  | 5.283120248        | 4.126344648           |
| 5730420D15Rik | 0.000462861      | -1.205114611    | down                | 3.973842547        | 5.178957158           |
| 5730420D15Rik | 0.003952813      | -1.357569943    | down                | 4.067255747        | 5.42482569            |
| 6530402F18Rik | 6.39E-05         | 1.028156138     | up                  | 5.703803311        | 4.675647173           |
| 8430419K02Rik | 0.001272276      | -1.021667055    | down                | 4.067449333        | 5.089116388           |
| 8430430B14Rik | 0.001445454      | -1.303932445    | down                | 3.210739812        | 4.514672257           |
| 9530027J09Rik | 2.76E-05         | 1.286301679     | up                  | 5.823285058        | 4.53698338            |
| A230077H06Rik | 1.50E-06         | -1.305256632    | down                | 4.670100976        | 5.975357608           |

|               |             |              |      |             |             |
|---------------|-------------|--------------|------|-------------|-------------|
| A230107N01Rik | 0.02191052  | 1.03347471   | up   | 5.185714836 | 4.152240126 |
| A330040F15Rik | 0.009963622 | -1.376263308 | down | 3.180038224 | 4.556301532 |
| A330041J22Rik | 0.000833232 | -1.590063972 | down | 4.340920456 | 5.930984428 |
| A530001N23Rik | 6.67E-05    | -1.284489294 | down | 4.773725082 | 6.058214376 |
| A630034I12Rik | 0.00380807  | 1.171417208  | up   | 5.549844271 | 4.378427063 |
| A630034I12Rik | 0.002530591 | 1.227979075  | up   | 5.449176043 | 4.221196969 |
| A630034I12Rik | 0.00648185  | 1.057515453  | up   | 5.594698475 | 4.537183022 |
| A630034I12Rik | 0.011529018 | 1.051099896  | up   | 5.318993365 | 4.267893469 |
| A730020M07Rik | 0.00737483  | -1.001229638 | down | 2.837222595 | 3.838452233 |
| A930001C03Rik | 0.000219364 | 1.712852831  | up   | 4.059525199 | 2.346672369 |
| A930038B10Rik | 0.001094839 | -1.058260088 | down | 3.333900582 | 4.39216067  |
| AA387883      | 0.019814167 | -1.136374771 | down | 2.441289866 | 3.577664637 |
| AI662270      | 0.001299527 | 1.297877325  | up   | 5.75431148  | 4.456434155 |
| AI662270      | 5.44E-06    | 1.608979318  | up   | 5.981336699 | 4.372357381 |
| AI662270      | 7.09E-06    | 1.380622517  | up   | 5.80987219  | 4.429249673 |
| AI662270      | 4.74E-07    | 1.585786881  | up   | 5.678385754 | 4.092598873 |
| AV064505      | 1.07E-05    | 1.335500855  | up   | 9.384823615 | 8.049322759 |
| AW112010      | 8.81E-06    | 2.133265463  | up   | 6.389986806 | 4.256721343 |
| AW822252      | 0.000130877 | -1.101485598 | down | 7.802586506 | 8.904072104 |
| Aim           | 0.001300699 | -1.207760588 | down | 2.620191019 | 3.827951607 |
| Aim           | 0.032827596 | -1.539940388 | down | 2.206932717 | 3.746873106 |
| B230307C23Rik | 3.08E-05    | -1.192070101 | down | 6.824488587 | 8.016558689 |
| BC018473      | 0.000265175 | 1.68551675   | up   | 6.37090761  | 4.68539086  |
| BC051226      | 0.000932433 | -1.08034876  | down | 6.952317646 | 8.032666406 |
| BC051226      | 0.000390252 | -1.093095423 | down | 6.818587397 | 7.91168282  |
| BC051226      | 0.000363048 | -1.054911856 | down | 6.974827584 | 8.02973944  |
| C230014O12Rik | 0.014062697 | -1.1198502   | down | 2.363649204 | 3.483499404 |
| C330004P14Rik | 4.67E-05    | -1.807555191 | down | 1.79967382  | 3.607229011 |
| Dleu2         | 0.001008049 | 1.480102626  | up   | 10.68257685 | 9.202474226 |
| E130018O15Rik | 8.93E-05    | -1.603116767 | down | 1.796995618 | 3.400112385 |
| E130201H02Rik | 0.002341915 | -1.185545812 | down | 1.995182964 | 3.180728776 |
| E230029C05Rik | 0.012118392 | 1.839826204  | up   | 3.942831147 | 2.103004943 |
| E230029C05Rik | 0.003182243 | 2.117543668  | up   | 4.229875811 | 2.112332143 |
| E330011O21Rik | 0.000221755 | -1.489663035 | down | 4.360477778 | 5.850140814 |
| F630028O10Rik | 1.05E-05    | 1.359177835  | up   | 6.202334999 | 4.843157164 |
| F630040K05Rik | 0.004659813 | -2.032469799 | down | 1.796561874 | 3.829031672 |
| Fmpd1os       | 1.26E-05    | -1.150875752 | down | 5.145929841 | 6.296805593 |
| Gm10258       | 0.025303712 | 1.045024932  | up   | 4.497311658 | 3.452286726 |
| Gm10510       | 0.047676593 | -1.050680638 | down | 3.391560069 | 4.442240707 |
| Gm10536       | 0.00034319  | -1.866983479 | down | 2.530209837 | 4.397193316 |
| Gm1070        | 0.006393076 | 1.311172245  | up   | 10.23230144 | 8.921129194 |
| Gm11210       | 0.000326615 | -1.527714785 | down | 3.127051047 | 4.654765831 |
| Gm11337       | 5.24E-07    | -1.081793061 | down | 6.527668391 | 7.609461452 |
| Gm11419       | 0.009084883 | -1.022680941 | down | 3.61612057  | 4.638801511 |
| Gm11426       | 1.60E-06    | -1.452517368 | down | 5.019684519 | 6.472201887 |
| Gm11844       | 0.010145423 | 1.018960692  | up   | 7.412237238 | 6.393276546 |
| Gm11978       | 2.89E-06    | -3.283631564 | down | 6.106064346 | 9.38969591  |
| Gm11999       | 1.97E-07    | -2.924210707 | down | 2.388166835 | 5.312377542 |
| Gm12031       | 0.03331369  | 1.252597992  | up   | 3.175329341 | 1.922731349 |
| Gm12188       | 0.001317521 | 1.09109919   | up   | 11.83384813 | 10.74274895 |
| Gm12248       | 0.035762349 | -1.529568958 | down | 2.481985821 | 4.011554779 |
| Gm12315       | 0.000126435 | -1.21621259  | down | 4.904960128 | 6.121172718 |
| Gm12315       | 0.000226773 | -1.045834266 | down | 4.927438001 | 5.973272267 |
| Gm12354       | 0.005417048 | -1.00170344  | down | 4.839153484 | 5.840856924 |
| Gm12405       | 0.005268138 | -1.509136813 | down | 2.009094733 | 3.518231547 |
| Gm12602       | 0.009885294 | 1.580838831  | up   | 3.627085047 | 2.046246216 |
| Gm12602       | 0.002717992 | 1.907147283  | up   | 3.531454407 | 1.624307124 |
| Gm12693       | 0.007692989 | -1.22463851  | down | 1.875028084 | 3.099666594 |

|         |             |              |      |             |             |
|---------|-------------|--------------|------|-------------|-------------|
| Gm12830 | 6.61E-06    | -1.100678949 | down | 3.837652048 | 4.938330997 |
| Gm13269 | 0.001096022 | -1.334494281 | down | 3.950932129 | 5.28542641  |
| Gm13790 | 0.000198117 | -1.187955289 | down | 6.051443771 | 7.23939906  |
| Gm13816 | 0.000103251 | -1.065416195 | down | 4.623648933 | 5.689065128 |
| Gm14051 | 8.66E-05    | -1.710154251 | down | 4.01533571  | 5.725489961 |
| Gm14199 | 0.001143705 | -1.015497915 | down | 3.165844964 | 4.181342879 |
| Gm14244 | 0.01821161  | -1.408436176 | down | 2.183977797 | 3.592413973 |
| Gm14342 | 5.41E-05    | -1.461689032 | down | 3.40448304  | 4.866172072 |
| Gm14707 | 0.000310446 | -1.355839234 | down | 3.150222337 | 4.506061571 |
| Gm15320 | 0.003425928 | 1.311769988  | up   | 6.5157867   | 5.204016713 |
| Gm15320 | 0.007875104 | 1.107615025  | up   | 6.388569328 | 5.280954303 |
| Gm15320 | 0.005866265 | 1.116642663  | up   | 6.37563952  | 5.258996856 |
| Gm15389 | 0.000343825 | -1.161463421 | down | 3.222677152 | 4.384140573 |
| Gm15471 | 0.002679061 | -1.018804828 | down | 3.019086122 | 4.03789095  |
| Gm15523 | 0.004433317 | 1.068846075  | up   | 4.74894444  | 3.680098364 |
| Gm15523 | 0.007142247 | 1.076331102  | up   | 4.606281619 | 3.529950518 |
| Gm15523 | 6.93E-05    | 1.57684183   | up   | 4.929039579 | 3.352197749 |
| Gm15569 | 0.000160693 | -1.046501691 | down | 3.609348042 | 4.655849733 |
| Gm15645 | 0.000104819 | -1.654978788 | down | 2.968967665 | 4.623946453 |
| Gm15669 | 0.013585665 | 1.052785776  | up   | 4.847059716 | 3.79427394  |
| Gm15802 | 0.028479774 | -1.029843851 | down | 3.496125691 | 4.525969542 |
| Gm16835 | 0.000224316 | 1.098609382  | up   | 4.742650428 | 3.644041046 |
| Gm16984 | 1.32E-05    | -1.317203629 | down | 4.853425604 | 6.170629233 |
| Gm17116 | 2.95E-05    | -1.206045385 | down | 6.77199214  | 7.978037525 |
| Gm17399 | 0.029754034 | -1.460294993 | down | 2.088993191 | 3.549288184 |
| Gm17619 | 3.69E-05    | -1.121054458 | down | 5.382468172 | 6.50352263  |
| Gm17746 | 2.80E-06    | -1.450171475 | down | 2.12919101  | 3.579362486 |
| Gm17830 | 0.00170106  | -1.705307501 | down | 1.554915764 | 3.260223265 |
| Gm19705 | 0.000304903 | -2.362414659 | down | 3.73138023  | 6.09379489  |
| Gm19705 | 0.003728727 | -1.958501341 | down | 4.00636335  | 5.964864691 |
| Gm19708 | 0.000388034 | -1.225860501 | down | 4.489116563 | 5.714977064 |
| Gm19784 | 0.000535203 | -2.502925718 | down | 1.427997009 | 3.930922727 |
| Gm20149 | 0.000815416 | -1.903401382 | down | 2.755814894 | 4.659216277 |
| Gm20356 | 4.21E-05    | -1.083082904 | down | 4.950211496 | 6.0332944   |
| Gm20627 | 0.000845697 | 1.211192502  | up   | 5.339139952 | 4.12794745  |
| Gm20740 | 6.12E-05    | -1.883879297 | down | 2.718578524 | 4.602457821 |
| Gm20756 | 0.032754737 | -1.185300163 | down | 2.346811641 | 3.532111804 |
| Gm2560  | 0.000430121 | -1.172980568 | down | 4.490021466 | 5.663002033 |
| Gm26555 | 0.038922922 | -1.195422641 | down | 3.477006963 | 4.672429604 |
| Gm26555 | 0.015287164 | -1.018171026 | down | 3.384936229 | 4.403107256 |
| Gm26555 | 0.002631849 | -1.092454528 | down | 3.18038014  | 4.272834668 |
| Gm26559 | 0.02221183  | -1.025089298 | down | 4.24838395  | 5.273473248 |
| Gm26564 | 3.41E-05    | -1.431671552 | down | 8.243561586 | 9.675233138 |
| Gm26618 | 0.031102235 | 1.236224525  | up   | 4.148162182 | 2.911937658 |
| Gm26748 | 0.000138744 | -1.337012346 | down | 2.203750133 | 3.540762479 |
| Gm26800 | 5.10E-06    | -3.216251371 | down | 1.629128587 | 4.845379958 |
| Gm26911 | 0.013614714 | -1.251566823 | down | 2.886028762 | 4.137595584 |
| Gm28167 | 0.038018921 | -1.406186098 | down | 2.700545347 | 4.106731445 |
| Gm2824  | 1.49E-05    | -1.30867966  | down | 3.95029332  | 5.25897298  |
| Gm2848  | 1.39E-05    | -1.001385337 | down | 7.156118187 | 8.157503525 |
| Gm28782 | 0.000316915 | -1.843538305 | down | 3.973669935 | 5.817208241 |
| Gm28888 | 0.003361958 | -1.970228474 | down | 2.042484979 | 4.012713453 |
| Gm28888 | 0.033165306 | -1.382088676 | down | 1.986250695 | 3.368339371 |
| Gm28979 | 0.001876386 | -1.030339047 | down | 4.513790507 | 5.544129555 |
| Gm29230 | 0.000241247 | -1.184112899 | down | 8.381123737 | 9.565236636 |
| Gm29514 | 3.04E-06    | -1.2190536   | down | 9.462377835 | 10.68143144 |
| Gm29514 | 1.06E-06    | -1.228360172 | down | 9.431692255 | 10.66005243 |
| Gm29681 | 5.74E-05    | -1.493495233 | down | 4.0769486   | 5.570443833 |

|         |             |              |      |             |             |
|---------|-------------|--------------|------|-------------|-------------|
| Gm29684 | 1.29E-05    | -1.957427402 | down | 3.89581033  | 5.853237732 |
| Gm29711 | 0.004699458 | 1.33501878   | up   | 4.336373276 | 3.001354496 |
| Gm29711 | 0.000867011 | 1.420746701  | up   | 3.702897347 | 2.282150647 |
| Gm29870 | 0.00261854  | -1.729573227 | down | 2.817569153 | 4.54714238  |
| Gm29886 | 2.37E-05    | 1.102958134  | up   | 9.738883928 | 8.635925794 |
| Gm29886 | 0.000253075 | 1.396604607  | up   | 9.215274629 | 7.818670021 |
| Gm29897 | 0.020359755 | -1.052049834 | down | 2.667729747 | 3.719779582 |
| Gm29901 | 0.016914864 | 1.165294937  | up   | 3.81601622  | 2.650721283 |
| Gm30055 | 0.030088457 | 1.021354706  | up   | 4.525377008 | 3.504022302 |
| Gm30063 | 0.001599654 | 1.344069906  | up   | 4.108880209 | 2.764810303 |
| Gm30063 | 0.001679487 | 1.154557042  | up   | 3.977040535 | 2.822483493 |
| Gm30063 | 0.011542525 | 1.135602911  | up   | 4.289001759 | 3.153398848 |
| Gm30064 | 0.020306863 | -1.473723955 | down | 2.590156306 | 4.063880261 |
| Gm30075 | 0.003034505 | -1.147241954 | down | 2.39932217  | 3.546564124 |
| Gm30076 | 2.17E-05    | -1.052064571 | down | 5.095733802 | 6.147798373 |
| Gm30091 | 1.75E-05    | -1.403007031 | down | 6.027734074 | 7.430741104 |
| Gm30113 | 3.82E-05    | -1.077758032 | down | 8.595064287 | 9.672822319 |
| Gm30145 | 0.000348889 | -1.89509723  | down | 1.619213579 | 3.514310809 |
| Gm30173 | 0.001508362 | 1.018788843  | up   | 4.446900324 | 3.428111481 |
| Gm30173 | 0.012914742 | 1.021931478  | up   | 4.424277118 | 3.40234564  |
| Gm30213 | 0.004264577 | -1.140068575 | down | 4.084779704 | 5.22484828  |
| Gm30213 | 0.003154867 | -1.216008655 | down | 4.103732664 | 5.319741319 |
| Gm30235 | 0.027229389 | -1.050592015 | down | 3.60237627  | 4.652968285 |
| Gm30256 | 0.027199047 | -1.474287956 | down | 2.020930818 | 3.495218773 |
| Gm30256 | 0.002881099 | -1.101763116 | down | 2.822157954 | 3.92392107  |
| Gm30263 | 6.74E-07    | -1.169157397 | down | 4.585458481 | 5.754615878 |
| Gm30301 | 1.03E-05    | -1.055670651 | down | 4.487892025 | 5.543562676 |
| Gm30303 | 2.30E-07    | -1.585955223 | down | 3.867635108 | 5.453590331 |
| Gm30321 | 0.047034181 | -1.304403886 | down | 2.736151601 | 4.040555487 |
| Gm30339 | 0.001574869 | 1.019748953  | up   | 3.512769527 | 2.493020574 |
| Gm30362 | 0.002763127 | -1.005547834 | down | 5.337455046 | 6.343002881 |
| Gm30388 | 0.000196133 | 1.391367619  | up   | 7.61668805  | 6.225320431 |
| Gm30388 | 6.90E-05    | 1.398611021  | up   | 7.508367826 | 6.109756805 |
| Gm30402 | 0.000527438 | -1.918938857 | down | 2.439790755 | 4.358729612 |
| Gm30402 | 0.002192829 | -2.247207955 | down | 2.065366049 | 4.312574004 |
| Gm30427 | 0.00181906  | 1.40510608   | up   | 3.798904381 | 2.393798301 |
| Gm30439 | 6.21E-05    | -1.431764496 | down | 4.460131011 | 5.891895506 |
| Gm30444 | 0.005169344 | -1.025176367 | down | 2.727284776 | 3.752461143 |
| Gm30446 | 0.015411512 | 1.020190341  | up   | 5.694216646 | 4.674026305 |
| Gm30446 | 0.013493506 | 1.037338025  | up   | 9.643014463 | 8.605676438 |
| Gm30446 | 0.000488508 | 1.168016998  | up   | 9.57365657  | 8.405639572 |
| Gm30459 | 0.000631529 | -1.344145637 | down | 5.618418678 | 6.962564315 |
| Gm30470 | 0.028787903 | 1.225634456  | up   | 5.647862905 | 4.42222845  |
| Gm30528 | 0.00743445  | 1.833043754  | up   | 10.21602951 | 8.38298576  |
| Gm30528 | 4.56E-06    | 1.445045598  | up   | 11.29271296 | 9.847667358 |
| Gm30532 | 0.010597347 | 1.424129271  | up   | 3.609315253 | 2.185185982 |
| Gm30577 | 0.000128934 | 1.483408869  | up   | 5.712217114 | 4.228808245 |
| Gm30585 | 0.005797113 | -1.031355849 | down | 3.402073142 | 4.433428991 |
| Gm30604 | 0.002531705 | 1.000078309  | up   | 6.869718487 | 5.869640178 |
| Gm30608 | 0.000569112 | -1.056807367 | down | 5.33969096  | 6.396498326 |
| Gm30609 | 4.88E-06    | -1.158674167 | down | 3.635395441 | 4.794069607 |
| Gm30654 | 0.046921178 | -1.195594974 | down | 2.428511596 | 3.62410657  |
| Gm30754 | 0.003497117 | -1.543941939 | down | 1.728940461 | 3.2728824   |
| Gm30769 | 1.90E-06    | -1.411044846 | down | 3.964739155 | 5.375784001 |
| Gm30784 | 0.000622331 | -1.09953071  | down | 4.380270781 | 5.479801491 |
| Gm30788 | 1.25E-06    | -1.021520914 | down | 5.391778288 | 6.413299202 |
| Gm30821 | 0.038567064 | -1.132200907 | down | 2.586742782 | 3.718943689 |
| Gm30842 | 3.19E-05    | -1.004247586 | down | 4.462394383 | 5.466641969 |



|         |             |              |      |             |             |
|---------|-------------|--------------|------|-------------|-------------|
| Gm30954 | 0.000595184 | 1.159543107  | up   | 6.753151903 | 5.593608795 |
| Gm31064 | 0.000594841 | -1.016706296 | down | 5.691014766 | 6.707721062 |
| Gm31089 | 0.001570867 | 1.241364847  | up   | 5.549044787 | 4.30767994  |
| Gm31089 | 0.001076659 | 1.083154721  | up   | 5.729660585 | 4.646505863 |
| Gm31129 | 0.002789995 | 1.060486255  | up   | 8.104264486 | 7.043778231 |
| Gm31145 | 8.76E-05    | -1.294484928 | down | 4.330821849 | 5.625306777 |
| Gm31145 | 3.57E-06    | -1.376045332 | down | 4.299774903 | 5.675820235 |
| Gm31145 | 0.001789102 | -1.245767473 | down | 4.447951484 | 5.693718957 |
| Gm31145 | 1.47E-05    | -1.338420637 | down | 4.417983882 | 5.756404519 |
| Gm31145 | 0.000488302 | -1.384673482 | down | 4.270422968 | 5.65509645  |
| Gm31145 | 0.004863269 | -1.466216446 | down | 4.212583732 | 5.678800178 |
| Gm31145 | 0.000263021 | -1.360919698 | down | 4.323218969 | 5.684138667 |
| Gm31146 | 0.002297774 | -1.338784966 | down | 2.494749542 | 3.833534508 |
| Gm31146 | 0.001221116 | -1.704580572 | down | 1.847884166 | 3.552464738 |
| Gm31159 | 0.000211117 | 1.353556989  | up   | 7.179656421 | 5.826099432 |
| Gm31159 | 0.005184031 | 2.067460424  | up   | 6.353284226 | 4.285823802 |
| Gm31161 | 0.001643252 | -1.008031924 | down | 6.232339611 | 7.240371535 |
| Gm31204 | 0.040028815 | -1.187880673 | down | 2.571075459 | 3.758956132 |
| Gm31204 | 0.020859733 | -1.52224399  | down | 2.322728799 | 3.844972789 |
| Gm31234 | 0.007496503 | -1.438080596 | down | 2.575313198 | 4.013393795 |
| Gm31261 | 0.001519741 | -1.196847913 | down | 3.611430217 | 4.80827813  |
| Gm31268 | 0.000416462 | -1.29668938  | down | 3.141944479 | 4.438633859 |
| Gm31268 | 0.002456507 | -1.299691783 | down | 3.160677726 | 4.460369509 |
| Gm31278 | 0.002728478 | -1.279979061 | down | 3.760563286 | 5.040542347 |
| Gm31370 | 0.004566815 | -1.099365949 | down | 2.363046567 | 3.462412516 |
| Gm31490 | 0.003171519 | -1.20586832  | down | 2.80521554  | 4.01108386  |
| Gm31504 | 0.003611147 | -1.172239098 | down | 2.629522098 | 3.801761196 |
| Gm31518 | 0.00333794  | -1.622901747 | down | 2.00484557  | 3.627747316 |
| Gm31518 | 6.31E-07    | -2.90179653  | down | 1.051186963 | 3.952983494 |
| Gm31518 | 5.36E-06    | -2.690460319 | down | 1.114957832 | 3.805418151 |
| Gm31518 | 1.58E-05    | -3.033532652 | down | 1.183391073 | 4.216923725 |
| Gm31522 | 0.00094373  | 1.148937061  | up   | 6.501233385 | 5.352296324 |
| Gm31522 | 0.000549961 | 1.043587364  | up   | 6.305851449 | 5.262264085 |
| Gm31522 | 0.001966976 | 1.010313067  | up   | 6.350680319 | 5.340367251 |
| Gm31550 | 1.20E-05    | 1.027340312  | up   | 11.74478454 | 10.71744423 |
| Gm31552 | 0.007043767 | -1.145228649 | down | 4.011228556 | 5.156457204 |
| Gm31637 | 5.78E-05    | -1.628603592 | down | 4.434662744 | 6.063266336 |
| Gm31652 | 0.034925219 | 1.267279355  | up   | 4.882092813 | 3.614813458 |
| Gm31724 | 0.000316059 | -1.083786318 | down | 3.758179265 | 4.841965583 |
| Gm31847 | 0.000355077 | 1.497725545  | up   | 3.279482551 | 1.781757007 |
| Gm31901 | 0.000402292 | -1.159517823 | down | 5.329793668 | 6.48931149  |
| Gm31901 | 0.000846888 | -1.108725216 | down | 5.287829689 | 6.396554904 |
| Gm31901 | 2.83E-05    | -1.160749036 | down | 5.255165378 | 6.415914414 |
| Gm31986 | 0.022185271 | -1.637091772 | down | 2.210148436 | 3.847240208 |
| Gm31992 | 0.010770597 | -1.173275054 | down | 3.936737964 | 5.110013018 |
| Gm32003 | 0.00161602  | -1.079756643 | down | 4.141536821 | 5.221293465 |
| Gm32055 | 0.003717967 | -1.213609269 | down | 2.391161625 | 3.604770894 |
| Gm32209 | 0.001520269 | -1.155936458 | down | 3.430700961 | 4.586637419 |
| Gm32209 | 0.000939532 | -1.313178721 | down | 3.43411506  | 4.747293782 |
| Gm32213 | 0.000119479 | -1.116709246 | down | 5.366399049 | 6.483108295 |
| Gm32219 | 0.001574785 | 1.347705602  | up   | 4.611101739 | 3.263396137 |
| Gm32219 | 0.00087053  | 1.355528695  | up   | 4.462180777 | 3.106652083 |
| Gm32243 | 0.000116455 | 1.020859537  | up   | 7.531279409 | 6.510419872 |
| Gm32245 | 0.003951979 | -1.340290937 | down | 2.581057323 | 3.92134826  |
| Gm32245 | 0.044075496 | -1.305311279 | down | 2.504722939 | 3.810034217 |
| Gm32283 | 0.00112446  | -1.347971491 | down | 6.056013626 | 7.403985117 |
| Gm32293 | 0.000135385 | -1.551200431 | down | 4.191394489 | 5.742594921 |
| Gm32293 | 0.000924419 | -1.3493224   | down | 4.351796793 | 5.701119193 |

|         |             |              |      |             |             |
|---------|-------------|--------------|------|-------------|-------------|
| Gm32352 | 0.001213227 | -1.370765696 | down | 2.465036252 | 3.835801948 |
| Gm32377 | 0.000132341 | -1.23262161  | down | 4.67684164  | 5.909463249 |
| Gm32429 | 6.65E-06    | 1.28257623   | up   | 7.957245732 | 6.674669502 |
| Gm32432 | 0.002994941 | -1.518350758 | down | 3.804996169 | 5.323346928 |
| Gm32461 | 0.034846379 | 1.378661148  | up   | 3.304558844 | 1.925897696 |
| Gm32502 | 4.35E-06    | -1.109980671 | down | 4.271126221 | 5.381106891 |
| Gm32547 | 0.00272405  | -1.140364488 | down | 3.391953228 | 4.532317716 |
| Gm32576 | 0.004395695 | -1.766290049 | down | 1.97125295  | 3.737542999 |
| Gm32650 | 0.017159848 | -1.104485154 | down | 3.504908853 | 4.609394006 |
| Gm32651 | 1.90E-05    | -1.105371979 | down | 5.403908113 | 6.509280092 |
| Gm32684 | 0.006951476 | -1.655726022 | down | 1.96762633  | 3.623352352 |
| Gm32695 | 0.000759163 | -1.451983056 | down | 4.019435064 | 5.47141812  |
| Gm32707 | 0.000144928 | -1.044070386 | down | 5.101413186 | 6.145483572 |
| Gm32749 | 0.003679734 | -1.071646731 | down | 3.319420161 | 4.391066892 |
| Gm32762 | 2.52E-06    | -1.518902302 | down | 8.084462407 | 9.603364709 |
| Gm32772 | 0.006641283 | -1.070527333 | down | 4.474799134 | 5.545326467 |
| Gm32776 | 0.006862933 | -1.150230436 | down | 2.159259122 | 3.309489558 |
| Gm32793 | 0.022193974 | -1.593680242 | down | 1.702201038 | 3.29588128  |
| Gm32798 | 2.93E-05    | -1.466849082 | down | 2.437641828 | 3.90449091  |
| Gm32840 | 4.34E-06    | 1.625969978  | up   | 8.901792686 | 7.275822708 |
| Gm32846 | 0.000230448 | -1.268310116 | down | 2.879936493 | 4.14824661  |
| Gm32931 | 0.000470807 | 1.355420248  | up   | 5.108580309 | 3.753160062 |
| Gm32931 | 6.35E-05    | 2.045429332  | up   | 5.244284426 | 3.198855093 |
| Gm32931 | 0.001030088 | 1.085056303  | up   | 5.229244596 | 4.144188293 |
| Gm32957 | 0.002790714 | -1.267104478 | down | 2.429400628 | 3.696505106 |
| Gm32969 | 0.003581186 | 1.390575384  | up   | 5.172337873 | 3.781762489 |
| Gm32998 | 0.002548336 | -1.16259298  | down | 4.501997925 | 5.664590906 |
| Gm33023 | 0.021028834 | 1.78499151   | up   | 3.501115411 | 1.716123901 |
| Gm33027 | 0.000117547 | -1.257397833 | down | 3.995544261 | 5.252942094 |
| Gm33027 | 0.000152629 | -1.404525353 | down | 3.868994381 | 5.273519734 |
| Gm33027 | 4.41E-05    | -1.200200934 | down | 4.177187686 | 5.37738862  |
| Gm33106 | 0.012130127 | -1.672241835 | down | 1.976957392 | 3.649199227 |
| Gm33109 | 3.56E-06    | -1.519382626 | down | 6.578911231 | 8.098293857 |
| Gm33125 | 0.024856362 | -1.121669034 | down | 4.397050512 | 5.518719547 |
| Gm33180 | 2.56E-05    | -1.217258056 | down | 11.16476085 | 12.38201891 |
| Gm33204 | 0.030634711 | -1.038899988 | down | 3.104538453 | 4.143438441 |
| Gm33239 | 0.023401204 | -1.814739335 | down | 2.435717663 | 4.250456998 |
| Gm33318 | 0.001779933 | -1.293310265 | down | 3.652343352 | 4.945653617 |
| Gm33318 | 0.002621215 | -1.124086606 | down | 3.580315507 | 4.704402113 |
| Gm33333 | 0.026971196 | -1.055368043 | down | 3.10722117  | 4.162589213 |
| Gm33336 | 6.91E-06    | 1.604771217  | up   | 9.309433815 | 7.704662598 |
| Gm33368 | 0.000278393 | -1.182134863 | down | 4.489048755 | 5.671183618 |
| Gm33389 | 0.011980259 | -1.052246319 | down | 2.962368306 | 4.014614625 |
| Gm33389 | 0.002132546 | -1.826988353 | down | 2.222576435 | 4.049564788 |
| Gm33413 | 3.67E-06    | -1.321312446 | down | 5.500355456 | 6.821667901 |
| Gm33430 | 0.000418583 | -1.339713251 | down | 4.39474449  | 5.734457741 |
| Gm33430 | 0.00077565  | -1.282363644 | down | 4.540174296 | 5.82253794  |
| Gm33450 | 0.036769355 | -1.09420304  | down | 3.139702978 | 4.233906018 |
| Gm33470 | 0.001490986 | -2.078073983 | down | 2.15349277  | 4.231566753 |
| Gm33470 | 0.001401831 | -1.772184006 | down | 2.427318164 | 4.199502169 |
| Gm33508 | 1.64E-05    | -2.263278574 | down | 4.329473787 | 6.592752361 |
| Gm33508 | 2.04E-05    | -2.391133694 | down | 4.418749222 | 6.809882916 |
| Gm33524 | 0.039462924 | 1.208000456  | up   | 5.773835987 | 4.56583553  |
| Gm33524 | 0.000405396 | 1.30251754   | up   | 6.362915344 | 5.060397805 |
| Gm33551 | 0.004716344 | -1.012838955 | down | 2.699750147 | 3.712589102 |
| Gm33583 | 0.004772021 | -1.008436074 | down | 4.136928318 | 5.145364392 |
| Gm33594 | 0.000213052 | -1.725067111 | down | 1.909771784 | 3.634838895 |
| Gm33724 | 4.50E-06    | 1.363667299  | up   | 10.74218658 | 9.378519282 |

|         |             |              |      |             |             |
|---------|-------------|--------------|------|-------------|-------------|
| Gm33733 | 4.32E-05    | -2.269112424 | down | 1.69435506  | 3.963467485 |
| Gm33733 | 0.001349665 | -2.225330739 | down | 1.728607748 | 3.953938488 |
| Gm33733 | 5.55E-05    | -2.765240267 | down | 1.241273163 | 4.00651343  |
| Gm33733 | 0.000707335 | -2.493195227 | down | 1.43904775  | 3.932242977 |
| Gm33733 | 0.000121296 | -2.028336459 | down | 1.633107734 | 3.661444193 |
| Gm33733 | 0.002808623 | -2.070277014 | down | 1.512869592 | 3.583146606 |
| Gm33733 | 8.57E-05    | -2.63442837  | down | 1.373421231 | 4.007849601 |
| Gm33733 | 0.003511588 | -1.731563122 | down | 2.167226793 | 3.898789915 |
| Gm33733 | 0.000159614 | -2.29487541  | down | 1.756880713 | 4.051756122 |
| Gm33747 | 4.30E-05    | 1.029004056  | up   | 6.028996986 | 4.999992929 |
| Gm33784 | 5.39E-05    | 2.485255245  | up   | 13.61872044 | 11.13346519 |
| Gm33787 | 0.020678006 | 1.08299641   | up   | 4.758191309 | 3.675194899 |
| Gm33893 | 0.009403492 | -1.163780821 | down | 2.001133556 | 3.164914378 |
| Gm33895 | 0.010972165 | -1.394949388 | down | 2.148218816 | 3.543168205 |
| Gm33895 | 0.037348399 | 1.030008902  | up   | 5.171646321 | 4.141637419 |
| Gm33944 | 0.001693555 | -1.30901266  | down | 2.500762832 | 3.809775492 |
| Gm34048 | 0.000193929 | -1.245753725 | down | 4.491254841 | 5.737008567 |
| Gm34059 | 0.000770679 | -2.242897031 | down | 1.903833283 | 4.146730314 |
| Gm34059 | 0.011435258 | -1.811520379 | down | 2.324837747 | 4.136358126 |
| Gm34069 | 0.025267279 | -1.247212355 | down | 2.248705975 | 3.49591833  |
| Gm34084 | 0.001554674 | 1.116598847  | up   | 3.712436708 | 2.595837861 |
| Gm34084 | 0.028525179 | 1.216730607  | up   | 3.3091379   | 2.092407293 |
| Gm34128 | 0.006107033 | -1.479585208 | down | 1.927531007 | 3.407116215 |
| Gm34196 | 0.003198964 | -1.336992573 | down | 4.450405044 | 5.787397617 |
| Gm34218 | 0.005174909 | -1.115653535 | down | 2.511144814 | 3.626798349 |
| Gm34276 | 0.044684027 | 1.148924083  | up   | 4.523175047 | 3.374250965 |
| Gm34289 | 0.000566598 | -1.069247901 | down | 3.390921443 | 4.460169344 |
| Gm34350 | 0.001299613 | -1.518097774 | down | 2.988508172 | 4.506605946 |
| Gm34413 | 0.000346718 | -1.1362638   | down | 5.720769394 | 6.857033195 |
| Gm34455 | 3.45E-05    | 1.56260576   | up   | 7.81208098  | 6.24947522  |
| Gm34459 | 0.001297725 | -1.201507052 | down | 4.544787522 | 5.746294575 |
| Gm34583 | 0.044097565 | -1.286620101 | down | 2.74089558  | 4.027515682 |
| Gm34589 | 0.010223899 | -1.216513497 | down | 2.760243121 | 3.976756618 |
| Gm34607 | 0.031631891 | -1.727629801 | down | 2.045727899 | 3.7733577   |
| Gm34619 | 0.015200694 | -1.087015893 | down | 5.12185259  | 6.208868483 |
| Gm34627 | 0.000918364 | -1.30080736  | down | 3.654360863 | 4.955168222 |
| Gm34632 | 0.04964786  | -1.06152052  | down | 2.99300119  | 4.05452171  |
| Gm34632 | 0.003428362 | -1.102664864 | down | 2.728113888 | 3.830778752 |
| Gm34641 | 0.005764198 | -1.218305047 | down | 2.943846548 | 4.162151595 |
| Gm34645 | 0.004254435 | -1.247330621 | down | 4.051809771 | 5.299140392 |
| Gm34676 | 5.43E-06    | 1.420410014  | up   | 10.54558283 | 9.125172817 |
| Gm34759 | 0.004160744 | 2.236692199  | up   | 4.031188767 | 1.794496568 |
| Gm34801 | 0.029533686 | 1.680208978  | up   | 3.279480713 | 1.599271735 |
| Gm34828 | 7.44E-06    | -1.400702842 | down | 1.998471614 | 3.399174456 |
| Gm34829 | 0.017563309 | -1.660339636 | down | 2.361573158 | 4.021912794 |
| Gm34844 | 0.001265923 | -1.141238571 | down | 3.326440008 | 4.46767858  |
| Gm34905 | 2.75E-05    | -1.654955831 | down | 6.550831707 | 8.205787538 |
| Gm35017 | 0.000411447 | -1.144412153 | down | 3.633327524 | 4.777739677 |
| Gm35058 | 0.00024617  | -1.192849356 | down | 7.062378391 | 8.255227747 |
| Gm35098 | 0.039656986 | -1.010267107 | down | 2.664168824 | 3.674435931 |
| Gm35161 | 0.000733457 | -1.027360306 | down | 4.115311352 | 5.142671658 |
| Gm35172 | 0.00348713  | -1.695449572 | down | 4.255762542 | 5.951212115 |
| Gm35172 | 0.004577986 | -1.895687679 | down | 4.182005477 | 6.077693156 |
| Gm35172 | 0.000334662 | -1.892394158 | down | 4.288148504 | 6.180542662 |
| Gm35172 | 0.000997799 | -2.029750677 | down | 4.125975279 | 6.155725956 |
| Gm35187 | 3.34E-05    | 1.055088385  | up   | 8.105797972 | 7.050709588 |
| Gm35197 | 4.69E-06    | -1.740963998 | down | 4.644043532 | 6.385007529 |
| Gm35216 | 0.001896902 | -1.006158737 | down | 3.978807535 | 4.984966272 |

|         |             |              |      |             |             |
|---------|-------------|--------------|------|-------------|-------------|
| Gm35217 | 3.65E-05    | -1.179649884 | down | 4.063048    | 5.242697884 |
| Gm35280 | 0.000280394 | -1.494804891 | down | 2.730997983 | 4.225802874 |
| Gm35299 | 0.001407889 | -1.104614315 | down | 5.346959021 | 6.451573337 |
| Gm35305 | 0.003266483 | -1.261788972 | down | 5.927618938 | 7.18940791  |
| Gm35369 | 1.84E-05    | 1.030180187  | up   | 10.47584776 | 9.445667569 |
| Gm35392 | 0.000250479 | -1.191115768 | down | 3.987986247 | 5.179102015 |
| Gm35425 | 0.007896334 | 1.103816053  | up   | 3.693786081 | 2.589970028 |
| Gm35425 | 0.009311195 | 1.232410211  | up   | 3.38828076  | 2.155870549 |
| Gm35468 | 0.000218075 | -1.04126138  | down | 4.919601048 | 5.960862428 |
| Gm35507 | 0.016901523 | -1.236686025 | down | 2.257956415 | 3.49464244  |
| Gm35524 | 0.0072428   | -1.068247307 | down | 4.198105405 | 5.266352712 |
| Gm35524 | 0.000354425 | -1.312777876 | down | 3.999110659 | 5.311888536 |
| Gm35551 | 0.011374774 | 1.301810858  | up   | 4.330675988 | 3.02886513  |
| Gm35596 | 6.07E-05    | 2.368726462  | up   | 8.879031917 | 6.510305454 |
| Gm35596 | 0.000749824 | 1.267114384  | up   | 7.197810935 | 5.930696551 |
| Gm35596 | 1.91E-05    | 2.836484906  | up   | 8.900152001 | 6.063667094 |
| Gm35596 | 0.000281988 | 2.498559006  | up   | 9.044875012 | 6.546316006 |
| Gm35600 | 0.009234155 | -1.498580013 | down | 1.638914544 | 3.137494557 |
| Gm35607 | 0.000463395 | -1.149621336 | down | 4.597865764 | 5.747487099 |
| Gm35607 | 0.002991622 | -1.001411235 | down | 4.842365959 | 5.843777194 |
| Gm35621 | 5.31E-06    | 1.473829927  | up   | 10.9197357  | 9.445905768 |
| Gm35718 | 2.80E-05    | -1.493983116 | down | 6.251438651 | 7.745421767 |
| Gm35723 | 2.36E-05    | -1.247673803 | down | 9.353830377 | 10.60150418 |
| Gm35723 | 0.000170116 | -1.331074007 | down | 9.083554619 | 10.41462863 |
| Gm35851 | 0.039376947 | -1.234222789 | down | 2.678414429 | 3.912637217 |
| Gm35865 | 0.011260063 | -1.013331581 | down | 2.726595155 | 3.739926735 |
| Gm35908 | 1.27E-05    | -1.301711931 | down | 5.623287983 | 6.924999914 |
| Gm35933 | 8.92E-06    | -1.589815289 | down | 4.886447227 | 6.476262516 |
| Gm35933 | 0.00134421  | -1.63580726  | down | 3.506495879 | 5.142303139 |
| Gm35957 | 8.76E-05    | -2.159810748 | down | 2.455114297 | 4.614925045 |
| Gm3596  | 1.72E-05    | 1.164288606  | up   | 8.743951319 | 7.579662714 |
| Gm36012 | 0.000200044 | 1.280585037  | up   | 9.710131255 | 8.429546218 |
| Gm36048 | 0.004158974 | 1.800197808  | up   | 3.68615797  | 1.885960162 |
| Gm36062 | 0.002650364 | -1.092840025 | down | 2.484074327 | 3.576914351 |
| Gm36062 | 0.000926733 | -1.809075334 | down | 2.002184694 | 3.811260028 |
| Gm36069 | 0.00055644  | -1.396244191 | down | 2.118443972 | 3.514688163 |
| Gm36090 | 0.026275206 | 1.205753541  | up   | 3.958597337 | 2.752843796 |
| Gm36118 | 0.001404083 | -1.267407049 | down | 4.259880718 | 5.527287767 |
| Gm36129 | 0.011269603 | -2.004069617 | down | 2.662686168 | 4.666755785 |
| Gm36129 | 0.004956369 | -1.255109242 | down | 2.864651351 | 4.119760593 |
| Gm36129 | 0.000116055 | -1.429973102 | down | 3.061760771 | 4.491733873 |
| Gm36129 | 0.0002052   | -1.080092275 | down | 3.34396672  | 4.424058996 |
| Gm36129 | 0.0076249   | -1.515123033 | down | 2.798383234 | 4.313506267 |
| Gm36144 | 0.001123277 | -1.598202283 | down | 3.108275408 | 4.706477691 |
| Gm36148 | 0.006787697 | 1.372333068  | up   | 3.63991556  | 2.267582492 |
| Gm36190 | 0.002589899 | -2.449182925 | down | 2.271009964 | 4.72019289  |
| Gm36193 | 0.0032643   | -1.59576194  | down | 2.487679703 | 4.083441643 |
| Gm36213 | 6.63E-06    | -1.850093901 | down | 1.751552259 | 3.60164616  |
| Gm36244 | 0.024260942 | 1.270025115  | up   | 7.672687251 | 6.402662136 |
| Gm36244 | 0.021730243 | 1.326331601  | up   | 7.777328997 | 6.450997396 |
| Gm36246 | 0.015864484 | 1.239570228  | up   | 4.575966069 | 3.336395841 |
| Gm36254 | 5.51E-05    | -1.042186928 | down | 6.320604805 | 7.362791733 |
| Gm36284 | 2.17E-05    | 1.043084517  | up   | 5.519553049 | 4.476468532 |
| Gm36304 | 0.001312044 | -2.449774357 | down | 1.744648124 | 4.194422481 |
| Gm36309 | 0.000548443 | -1.061594631 | down | 3.253891973 | 4.315486604 |
| Gm36356 | 0.005370238 | -1.551884945 | down | 2.038052655 | 3.589937599 |
| Gm36357 | 0.00075188  | -1.562628435 | down | 4.202041834 | 5.764670269 |
| Gm36358 | 0.004374983 | -2.295837897 | down | 2.624171507 | 4.920009404 |

|         |             |              |      |             |             |
|---------|-------------|--------------|------|-------------|-------------|
| Gm36365 | 0.023984076 | -1.336541758 | down | 2.231983178 | 3.568524936 |
| Gm36406 | 0.019056416 | -1.354938334 | down | 2.202849276 | 3.557787609 |
| Gm36406 | 0.004609954 | -1.063471313 | down | 2.807920036 | 3.871391349 |
| Gm36406 | 0.026884601 | -1.183103537 | down | 2.48361326  | 3.666716797 |
| Gm36419 | 0.022203349 | -1.76957589  | down | 2.139057224 | 3.908633114 |
| Gm36464 | 0.001253112 | -1.307162287 | down | 3.055083162 | 4.362245449 |
| Gm36464 | 4.87E-06    | -1.614350097 | down | 2.711355667 | 4.325705764 |
| Gm36579 | 0.000142028 | -1.340479093 | down | 3.697521743 | 5.038000836 |
| Gm36579 | 0.000667012 | -1.048741458 | down | 4.160421292 | 5.20916275  |
| Gm36579 | 0.004894435 | -1.350855929 | down | 3.716509516 | 5.067365445 |
| Gm36584 | 4.21E-05    | -1.337089763 | down | 5.726432133 | 7.063521896 |
| Gm36648 | 0.02093943  | -1.614303832 | down | 3.64554278  | 5.259846612 |
| Gm36675 | 0.000770239 | -2.284482656 | down | 1.672626485 | 3.957109141 |
| Gm36676 | 2.45E-06    | 1.375826586  | up   | 10.15665482 | 8.780828233 |
| Gm36676 | 0.0005207   | 1.121814518  | up   | 9.9130112   | 8.791196682 |
| Gm36737 | 1.98E-06    | -1.450699743 | down | 4.474762228 | 5.925461971 |
| Gm36737 | 0.000149867 | -1.47600133  | down | 4.603450826 | 6.079452155 |
| Gm36801 | 1.77E-06    | -2.17159103  | down | 1.641623174 | 3.813214204 |
| Gm36894 | 0.000729312 | -1.920104856 | down | 2.984604709 | 4.904709565 |
| Gm36894 | 0.000128641 | -1.494073173 | down | 3.604356304 | 5.098429477 |
| Gm3764  | 9.85E-07    | -1.235600615 | down | 4.291462043 | 5.527062658 |
| Gm3764  | 0.000843573 | -1.035246188 | down | 4.581106221 | 5.61635241  |
| Gm3764  | 7.10E-05    | -1.062241261 | down | 4.505666902 | 5.567908163 |
| Gm3764  | 0.000424952 | -1.167089797 | down | 4.274321441 | 5.441411238 |
| Gm3764  | 0.000385527 | -1.115192583 | down | 4.383943201 | 5.499135784 |
| Gm3764  | 0.007194755 | -1.129501278 | down | 4.201909789 | 5.331411067 |
| Gm3764  | 0.000839881 | -1.15635088  | down | 4.209426045 | 5.365776925 |
| Gm38427 | 2.07E-06    | -1.160996604 | down | 3.596583213 | 4.757579817 |
| Gm38506 | 0.011582772 | 1.456505483  | up   | 7.276090149 | 5.819584666 |
| Gm38542 | 0.001465416 | -2.176666535 | down | 1.589403005 | 3.76606954  |
| Gm38542 | 0.008529535 | -1.531706423 | down | 2.026717625 | 3.558424048 |
| Gm38565 | 0.024743856 | 1.134372386  | up   | 4.335761315 | 3.201388928 |
| Gm38582 | 3.74E-05    | -1.457998157 | down | 8.224668888 | 9.682667046 |
| Gm38598 | 3.05E-06    | 1.120066318  | up   | 8.726189262 | 7.606122944 |
| Gm38598 | 1.21E-05    | 1.071210213  | up   | 8.628533538 | 7.557323326 |
| Gm38612 | 0.032886646 | -1.524148204 | down | 2.537306119 | 4.061454323 |
| Gm38657 | 0.000160193 | -1.138028048 | down | 4.044899808 | 5.182927856 |
| Gm38759 | 0.000793486 | -1.288097394 | down | 4.450635102 | 5.738732496 |
| Gm38828 | 0.001517897 | -1.292419564 | down | 2.978160986 | 4.270580549 |
| Gm38828 | 0.03567171  | -1.252900823 | down | 3.232652091 | 4.485552914 |
| Gm38862 | 0.000111465 | -1.764999888 | down | 1.739945012 | 3.5049449   |
| Gm38864 | 4.56E-06    | -1.051727167 | down | 8.13595217  | 9.187679337 |
| Gm38866 | 0.039772267 | -1.332940082 | down | 2.911894858 | 4.244834939 |
| Gm38934 | 8.67E-05    | -1.203973035 | down | 3.966105063 | 5.170078098 |
| Gm38966 | 0.047356799 | 1.490643663  | up   | 5.53725414  | 4.046610477 |
| Gm38973 | 0.00160477  | 1.380785831  | up   | 3.367633918 | 1.986848087 |
| Gm39015 | 2.16E-05    | -1.881175785 | down | 4.737591953 | 6.618767738 |
| Gm39058 | 5.52E-05    | -1.193670404 | down | 6.640274945 | 7.83394535  |
| Gm39070 | 1.16E-05    | -1.512012756 | down | 5.414948992 | 6.926961748 |
| Gm39206 | 5.86E-05    | -1.376946777 | down | 2.287907281 | 3.664854058 |
| Gm39213 | 0.000203453 | -1.427634076 | down | 6.444202099 | 7.871836175 |
| Gm39213 | 7.89E-05    | -1.368295201 | down | 6.512481216 | 7.880776417 |
| Gm39221 | 1.91E-06    | -1.055920576 | down | 3.61855639  | 4.674476966 |
| Gm39234 | 4.55E-06    | -1.748160866 | down | 7.060023941 | 8.808184808 |
| Gm39234 | 1.17E-05    | -1.720601122 | down | 7.221415376 | 8.942016498 |
| Gm39269 | 0.008699797 | -1.08264092  | down | 3.906473824 | 4.989114744 |
| Gm39283 | 0.011822752 | 1.523639132  | up   | 3.365626785 | 1.841987653 |
| Gm39343 | 0.00271923  | -1.855185158 | down | 3.514048115 | 5.369233273 |

|         |             |              |      |             |             |
|---------|-------------|--------------|------|-------------|-------------|
| Gm39380 | 3.82E-06    | -1.501889732 | down | 4.916416279 | 6.418306011 |
| Gm39383 | 1.62E-05    | -1.225429159 | down | 4.707003618 | 5.932432777 |
| Gm39494 | 0.000482784 | -1.050397062 | down | 4.785599174 | 5.835996236 |
| Gm39531 | 7.15E-07    | -1.273550702 | down | 7.068515776 | 8.342066478 |
| Gm39556 | 0.000373329 | -1.023412071 | down | 5.171786362 | 6.195198433 |
| Gm39586 | 0.003951029 | -1.19579307  | down | 3.606136561 | 4.801929631 |
| Gm39586 | 0.000172428 | -1.083713843 | down | 3.682108402 | 4.765822245 |
| Gm39628 | 0.011835437 | -1.176925765 | down | 3.095862491 | 4.272788256 |
| Gm39655 | 0.000559111 | -1.498119781 | down | 2.762315242 | 4.260435023 |
| Gm39681 | 0.000306546 | 1.175940951  | up   | 8.083213394 | 6.907272443 |
| Gm39760 | 1.59E-05    | -1.317145474 | down | 5.541893815 | 6.859039288 |
| Gm39792 | 0.026725933 | -1.003883999 | down | 2.202633921 | 3.206517919 |
| Gm39798 | 0.002031226 | 1.002992559  | up   | 5.516885011 | 4.513892453 |
| Gm39894 | 0.012561096 | -1.076230391 | down | 3.369810291 | 4.446040682 |
| Gm39900 | 0.012421909 | -1.040706554 | down | 3.465753627 | 4.506460181 |
| Gm39919 | 0.003493476 | -1.100278174 | down | 3.540595219 | 4.640873393 |
| Gm39923 | 0.019160203 | -1.753100128 | down | 1.790226709 | 3.543326837 |
| Gm39938 | 0.011518215 | 1.419262064  | up   | 4.377932099 | 2.958670035 |
| Gm40057 | 0.004141286 | -1.835756834 | down | 2.133625273 | 3.969382107 |
| Gm40078 | 0.004772365 | -1.428306123 | down | 2.367163503 | 3.795469626 |
| Gm40080 | 0.006089107 | -1.153946707 | down | 4.067165592 | 5.221112299 |
| Gm40080 | 0.000643552 | -1.147917565 | down | 3.858921228 | 5.006838793 |
| Gm40191 | 8.29E-06    | 1.91464533   | up   | 7.983477736 | 6.068832406 |
| Gm40210 | 4.94E-07    | 1.080131731  | up   | 8.200027156 | 7.119895425 |
| Gm40222 | 0.001483046 | -1.193925105 | down | 7.725460997 | 8.919386102 |
| Gm40312 | 3.80E-06    | -1.792574234 | down | 1.812847348 | 3.605421582 |
| Gm40331 | 0.002206392 | -1.364183321 | down | 3.717348502 | 5.081531823 |
| Gm40362 | 0.023918583 | 1.674152471  | up   | 4.24071339  | 2.566560919 |
| Gm40381 | 1.63E-05    | -1.395174595 | down | 8.014774312 | 9.409948907 |
| Gm40440 | 3.86E-07    | -1.035450489 | down | 4.071539833 | 5.106990322 |
| Gm40478 | 0.001329431 | -1.203810783 | down | 2.706678268 | 3.910489051 |
| Gm40508 | 0.000581543 | -1.737375551 | down | 1.734649672 | 3.472025223 |
| Gm40527 | 0.000101104 | 1.372462782  | up   | 6.362710775 | 4.990247994 |
| Gm40548 | 0.048205217 | -1.241589003 | down | 2.652688164 | 3.894277167 |
| Gm40576 | 0.002399933 | -1.354252757 | down | 2.953461056 | 4.307713813 |
| Gm40576 | 0.00487946  | -1.129448098 | down | 3.673421388 | 4.802869486 |
| Gm40576 | 0.032715093 | -1.103685942 | down | 3.448836018 | 4.552521959 |
| Gm40591 | 0.000256679 | 1.01978951   | up   | 6.180167806 | 5.160378296 |
| Gm40591 | 0.026518748 | 1.015835726  | up   | 6.36415076  | 5.348315034 |
| Gm40612 | 0.000210177 | -1.115950041 | down | 5.388358459 | 6.504308499 |
| Gm40642 | 0.000984043 | -1.404500632 | down | 2.511138285 | 3.915638918 |
| Gm40656 | 2.98E-05    | -1.372576593 | down | 5.962093964 | 7.334670557 |
| Gm40749 | 2.13E-05    | -1.518794342 | down | 6.532664797 | 8.051459138 |
| Gm40760 | 0.00059201  | 1.333768901  | up   | 5.39527919  | 4.06151029  |
| Gm40764 | 0.029950304 | -1.094639805 | down | 2.840855057 | 3.935494862 |
| Gm40783 | 4.68E-05    | 1.875055568  | up   | 7.544396391 | 5.669340823 |
| Gm40841 | 0.000472298 | -1.607405505 | down | 2.80696142  | 4.414366925 |
| Gm40918 | 0.007142041 | -1.021527486 | down | 3.580944902 | 4.602472388 |
| Gm40964 | 3.72E-05    | -1.513424563 | down | 7.403694483 | 8.917119046 |
| Gm40964 | 1.83E-05    | -1.456618882 | down | 7.450460938 | 8.90707982  |
| Gm40981 | 0.027663572 | -1.737222929 | down | 2.2925394   | 4.029762329 |
| Gm40996 | 1.78E-05    | 1.108309175  | up   | 8.799845297 | 7.691536122 |
| Gm41003 | 0.005159872 | -2.206412982 | down | 1.840169179 | 4.046582161 |
| Gm41012 | 0.032277406 | 1.079571578  | up   | 3.127416613 | 2.047845035 |
| Gm41018 | 0.012939682 | 1.113067678  | up   | 6.660977644 | 5.547909966 |
| Gm41018 | 0.000166693 | 1.200054865  | up   | 6.673785424 | 5.473730558 |
| Gm41033 | 0.000387626 | 1.178415444  | up   | 7.196491043 | 6.018075599 |
| Gm41033 | 0.001298403 | 1.181932343  | up   | 7.599023024 | 6.417090681 |

|         |             |              |      |             |             |
|---------|-------------|--------------|------|-------------|-------------|
| Gm41033 | 5.63E-05    | 1.205805363  | up   | 7.1284078   | 5.922602438 |
| Gm41046 | 0.040408698 | -1.560777518 | down | 2.261746237 | 3.822523754 |
| Gm41112 | 0.020985259 | -1.422693337 | down | 2.43448384  | 3.857177177 |
| Gm41131 | 5.26E-05    | -1.11675209  | down | 4.124591726 | 5.241343816 |
| Gm41177 | 0.008047872 | -1.534561875 | down | 2.758070246 | 4.292632121 |
| Gm41177 | 0.001194347 | -1.303916315 | down | 3.180310039 | 4.484226354 |
| Gm41177 | 0.025914631 | -1.578870651 | down | 2.667460331 | 4.246330982 |
| Gm41177 | 0.003507078 | -1.035151406 | down | 3.46459096  | 4.499742366 |
| Gm41177 | 0.000325928 | -1.603955615 | down | 2.970159221 | 4.574114836 |
| Gm41182 | 0.000248047 | 2.123237776  | up   | 3.261954002 | 1.138716226 |
| Gm41198 | 0.00073142  | -1.302495195 | down | 3.715202768 | 5.017697963 |
| Gm41217 | 0.000864561 | -1.03814624  | down | 3.588629742 | 4.626775983 |
| Gm41230 | 0.006980266 | -1.898977051 | down | 2.322190141 | 4.221167193 |
| Gm41289 | 0.000476468 | -2.002856433 | down | 3.491692645 | 5.494549078 |
| Gm41292 | 8.78E-06    | 1.128537542  | up   | 5.903763833 | 4.775226292 |
| Gm41302 | 0.000310261 | -1.503090478 | down | 1.987830033 | 3.490920512 |
| Gm41304 | 0.001914836 | -1.640068044 | down | 2.463320394 | 4.103388438 |
| Gm41304 | 0.005600664 | -1.216655635 | down | 2.725771627 | 3.942427263 |
| Gm41317 | 5.16E-05    | -1.659724906 | down | 3.473430127 | 5.133155034 |
| Gm41348 | 0.000234386 | 1.142278895  | up   | 5.339181658 | 4.196902764 |
| Gm41393 | 2.58E-05    | -1.362997542 | down | 6.496624585 | 7.859622127 |
| Gm41394 | 1.24E-05    | 1.53221535   | up   | 7.097794227 | 5.565578876 |
| Gm41428 | 0.003806321 | -2.243402748 | down | 1.748679599 | 3.992082347 |
| Gm41455 | 0.000941287 | -2.56446065  | down | 3.567030364 | 6.131491014 |
| Gm41455 | 2.74E-07    | -1.715244576 | down | 4.135793756 | 5.851038333 |
| Gm41459 | 0.002157688 | -1.888765846 | down | 2.226199275 | 4.11496512  |
| Gm41459 | 0.000453017 | -1.931713029 | down | 2.060870639 | 3.992583668 |
| Gm41485 | 0.042548419 | -1.444807301 | down | 2.775387956 | 4.220195257 |
| Gm41489 | 0.00704659  | -1.270716182 | down | 2.831986307 | 4.102702489 |
| Gm41541 | 0.019302389 | -1.263398841 | down | 1.859575694 | 3.122974535 |
| Gm41559 | 0.000979566 | -1.229745347 | down | 6.4189792   | 7.648724547 |
| Gm41631 | 0.001995585 | -1.10666155  | down | 3.007215883 | 4.113877433 |
| Gm41662 | 0.04668752  | -1.203364513 | down | 2.586909673 | 3.790274185 |
| Gm41663 | 0.032334669 | 1.397662331  | up   | 3.876669899 | 2.479007569 |
| Gm41696 | 0.01275627  | -1.679374149 | down | 2.257217215 | 3.936591364 |
| Gm41728 | 0.000677108 | -1.125006767 | down | 5.503852434 | 6.628859201 |
| Gm41731 | 1.18E-06    | -2.078333965 | down | 5.197242902 | 7.275576866 |
| Gm41742 | 0.000408908 | -1.198818862 | down | 4.15221999  | 5.351038852 |
| Gm41797 | 0.000895976 | -1.514282117 | down | 2.383713081 | 3.897995197 |
| Gm42004 | 7.76E-06    | -1.893165632 | down | 5.182391798 | 7.07555743  |
| Gm42032 | 0.001514408 | -2.056947321 | down | 2.042078696 | 4.099026017 |
| Gm42048 | 0.011708456 | 1.151450467  | up   | 7.5635319   | 6.412081433 |
| Gm42063 | 0.022472758 | -1.019016556 | down | 2.433694142 | 3.452710698 |
| Gm4208  | 0.000362398 | 1.067176374  | up   | 7.629192494 | 6.56201612  |
| Gm4208  | 0.000632163 | 1.105727612  | up   | 7.871004945 | 6.765277333 |
| Gm42080 | 0.043912642 | -1.139485545 | down | 3.554569562 | 4.694055107 |
| Gm42131 | 0.000767089 | -1.006196341 | down | 4.261114484 | 5.267310825 |
| Gm42142 | 0.001357324 | 1.222273569  | up   | 4.26102793  | 3.038754361 |
| Gm42142 | 0.001858612 | 1.125898501  | up   | 4.277755105 | 3.151856604 |
| Gm42150 | 2.28E-06    | -1.469296614 | down | 3.819880129 | 5.289176742 |
| Gm42197 | 0.034914953 | -1.607092172 | down | 2.565891982 | 4.172984154 |
| Gm42210 | 0.000106836 | -1.617206247 | down | 4.194224926 | 5.811431173 |
| Gm42217 | 0.002334099 | 1.568693518  | up   | 7.12213012  | 5.553436602 |
| Gm42217 | 4.14E-05    | 1.699143863  | up   | 7.319553317 | 5.620409454 |
| Gm42217 | 0.006914582 | 1.356187953  | up   | 6.992222813 | 5.63603486  |
| Gm42219 | 1.77E-05    | -1.708255304 | down | 4.632406982 | 6.340662286 |
| Gm42235 | 0.003704504 | -2.120240426 | down | 2.347340416 | 4.467580842 |
| Gm42272 | 0.000129268 | -1.423249457 | down | 4.341732837 | 5.764982294 |

|              |             |              |      |             |             |
|--------------|-------------|--------------|------|-------------|-------------|
| Gm42273      | 0.008641978 | -1.037265556 | down | 3.196539596 | 4.233805152 |
| Gm42279      | 0.01595514  | -1.042671758 | down | 4.443381531 | 5.48605329  |
| Gm42279      | 0.016400633 | -1.209072688 | down | 4.200225775 | 5.409298463 |
| Gm42282      | 0.000589952 | -1.052855514 | down | 5.382758108 | 6.435613621 |
| Gm42352      | 0.040234827 | -1.18622467  | down | 2.431547217 | 3.617771888 |
| Gm42395      | 0.003527775 | -1.698670608 | down | 2.33128338  | 4.029953988 |
| Gm454        | 1.36E-05    | -2.544572088 | down | 4.805093633 | 7.349665721 |
| Gm4541       | 0.000120626 | -1.530487621 | down | 8.084970337 | 9.615457958 |
| Gm4544       | 1.08E-05    | -1.170246503 | down | 5.566327891 | 6.736574394 |
| Gm4544       | 2.57E-05    | -1.108203549 | down | 5.704606397 | 6.812809946 |
| Gm4544       | 1.70E-05    | -1.141727986 | down | 5.665333916 | 6.807061902 |
| Gm4606       | 4.20E-05    | 2.089862631  | up   | 8.513176316 | 6.423313685 |
| Gm4681       | 0.000736483 | -1.60426825  | down | 2.963082968 | 4.567351218 |
| Gm4759       | 0.000669726 | 1.169718283  | up   | 4.022614285 | 2.852896002 |
| Gm5069       | 0.017219858 | -1.137935359 | down | 3.529184668 | 4.667120027 |
| Gm5150       | 8.42E-05    | 1.885899057  | up   | 4.508398497 | 2.622499439 |
| Gm5590       | 8.96E-06    | -1.110946306 | down | 4.497779853 | 5.608726159 |
| Gm5590       | 0.000263976 | -1.227311446 | down | 4.451567302 | 5.678878747 |
| Gm5907       | 2.40E-05    | -1.119086733 | down | 3.769270884 | 4.888357617 |
| Gm5922       | 0.00095861  | -1.355269307 | down | 2.850862006 | 4.206131313 |
| Gm6288       | 0.018066602 | -1.475662456 | down | 2.257024754 | 3.732687211 |
| Gm6568       | 3.33E-05    | -1.239864294 | down | 6.454817625 | 7.69468192  |
| Gm6579       | 2.97E-05    | -1.300479281 | down | 5.221199454 | 6.521678736 |
| Gm6602       | 2.24E-05    | -1.179372996 | down | 6.698312278 | 7.877685273 |
| Gm6642       | 0.000275348 | -2.333940868 | down | 1.477862195 | 3.811803063 |
| Gm7072       | 2.07E-07    | -1.466361454 | down | 7.703722224 | 9.170083678 |
| Gm7562       | 0.009298849 | -1.868775685 | down | 1.274106736 | 3.142882421 |
| Gm8995       | 9.22E-06    | 1.007170509  | up   | 6.140557177 | 5.133386668 |
| Gm9079       | 0.002190617 | -1.292055827 | down | 3.753453017 | 5.045508844 |
| Gm9618       | 0.001086262 | -1.03548152  | down | 5.088433277 | 6.123914797 |
| Gm9618       | 0.013334222 | -1.262390093 | down | 4.871410495 | 6.133800587 |
| Gm9920       | 0.010179255 | -1.920208251 | down | 1.742185033 | 3.662393285 |
| Gm9939       | 1.21E-06    | -1.047607541 | down | 5.954523712 | 7.002131253 |
| H2-K2        | 0.017679574 | 1.03251376   | up   | 3.915266365 | 2.882752605 |
| H2-K2        | 0.009401679 | 1.367795897  | up   | 3.798669031 | 2.430873134 |
| H2-K2        | 0.00180187  | 1.367742885  | up   | 3.815001875 | 2.44725899  |
| H2-Q5        | 2.45E-06    | 1.698543613  | up   | 6.29330654  | 4.594762927 |
| H2-Q5        | 1.93E-06    | 1.71454248   | up   | 6.439188401 | 4.724645921 |
| Kcnmb4os1    | 0.004433184 | 1.0076661    | up   | 3.786390848 | 2.778724748 |
| LOC102631676 | 0.010742296 | 1.643230132  | up   | 4.102249643 | 2.459019511 |
| LOC102631977 | 0.007172436 | -1.176572649 | down | 3.501016332 | 4.677588981 |
| LOC102631977 | 0.033410115 | -1.183742453 | down | 3.4538322   | 4.637574654 |
| LOC102632156 | 0.000182145 | -1.312362484 | down | 2.451935773 | 3.764298258 |
| LOC102632493 | 0.000138349 | -1.364844538 | down | 2.082461866 | 3.447306405 |
| LOC102633322 | 9.63E-06    | 1.135247146  | up   | 7.066039541 | 5.930792396 |
| LOC102634873 | 0.007328958 | -1.089761071 | down | 3.358108802 | 4.447869873 |
| LOC102634900 | 5.79E-08    | -1.561341358 | down | 2.043668931 | 3.605010288 |
| LOC102635521 | 0.00526517  | -1.206694436 | down | 4.07457616  | 5.281270596 |
| LOC102635638 | 0.038023251 | 1.72984865   | up   | 6.198512931 | 4.468664282 |
| LOC102636988 | 0.00508123  | -2.013455612 | down | 1.298401786 | 3.311857398 |
| LOC102636988 | 7.54E-05    | -1.582188704 | down | 3.096806763 | 4.678995468 |
| LOC102637021 | 7.94E-06    | -1.413881589 | down | 5.577329883 | 6.991211472 |
| LOC102637336 | 0.002119128 | -1.04979101  | down | 2.461324452 | 3.511115462 |
| LOC102637336 | 0.018012445 | -1.05825384  | down | 2.334905592 | 3.393159432 |
| LOC102637491 | 0.000136229 | -1.272616481 | down | 2.322577391 | 3.595193873 |
| LOC102637577 | 0.000141344 | -1.01508282  | down | 6.209679361 | 7.224762181 |
| LOC102637577 | 1.65E-05    | -1.035674854 | down | 6.28102694  | 7.316701794 |
| LOC102637577 | 7.74E-07    | -1.063791799 | down | 6.289938018 | 7.353729817 |



|              |             |              |      |             |             |
|--------------|-------------|--------------|------|-------------|-------------|
| LOC102637646 | 0.000949042 | -1.087430626 | down | 5.615928717 | 6.703359343 |
| LOC102638195 | 1.45E-05    | -1.413862321 | down | 5.348022392 | 6.761884713 |
| LOC102638195 | 3.75E-05    | -1.161132754 | down | 5.65462962  | 6.815762374 |
| LOC102638785 | 2.13E-05    | -2.467345681 | down | 7.215682624 | 9.683028305 |
| LOC102639143 | 0.003088173 | 1.797160342  | up   | 3.858433647 | 2.061273306 |
| LOC102640771 | 0.00968319  | 1.150591838  | up   | 4.159319641 | 3.008727803 |
| LOC102640771 | 0.004731883 | 1.187638279  | up   | 4.337466914 | 3.149828635 |
| LOC102641016 | 0.000647851 | 1.186574189  | up   | 6.737289612 | 5.550715423 |
| LOC102642034 | 0.018666725 | -1.123919526 | down | 2.426801292 | 3.550720818 |
| LOC105242408 | 0.000127487 | 1.256427747  | up   | 6.292429715 | 5.036001968 |
| LOC105242408 | 0.000126937 | 1.350081893  | up   | 6.071146502 | 4.721064609 |
| LOC105242408 | 2.60E-05    | 1.228257385  | up   | 6.239346037 | 5.011088652 |
| LOC105242408 | 4.40E-05    | 1.213038199  | up   | 6.450341949 | 5.237303751 |
| LOC105242408 | 0.000280799 | 1.139062094  | up   | 6.261052419 | 5.121990325 |
| LOC105242581 | 0.000385174 | 1.014878306  | up   | 5.867705788 | 4.852827482 |
| LOC105242826 | 0.000140939 | -1.121439607 | down | 3.835389405 | 4.956829012 |
| LOC105242826 | 0.01914051  | -1.823699718 | down | 3.069784186 | 4.893483904 |
| LOC105243551 | 0.010557076 | -1.21132998  | down | 3.263188702 | 4.474518682 |
| LOC105244193 | 0.003918474 | -1.283215472 | down | 2.650998899 | 3.934214371 |
| LOC105244416 | 0.001727226 | -1.036237388 | down | 4.155333541 | 5.191570929 |
| LOC105244416 | 0.003679631 | -1.032406604 | down | 4.503090967 | 5.535497571 |
| LOC105245651 | 0.008835409 | 1.069979977  | up   | 4.344508171 | 3.274528194 |
| LOC105245696 | 2.96E-05    | -1.144338335 | down | 3.229931666 | 4.374270001 |
| LOC105245696 | 0.000290967 | -1.251042391 | down | 2.990309858 | 4.241352249 |
| LOC105246531 | 0.007351509 | -1.245255452 | down | 3.023991365 | 4.269246816 |
| LOC108167359 | 0.000443752 | -1.910657983 | down | 3.156644509 | 5.067302492 |
| LOC108167367 | 9.49E-05    | -1.04759733  | down | 5.152519281 | 6.200116611 |
| LOC108167405 | 0.002689953 | -1.47494246  | down | 2.666993399 | 4.141935859 |
| LOC108167427 | 0.009187284 | -1.100518671 | down | 2.246857803 | 3.347376474 |
| LOC108167454 | 0.023643895 | 1.471934048  | up   | 3.663372428 | 2.19143838  |
| LOC108167492 | 9.32E-07    | -1.478473097 | down | 4.109512627 | 5.587985724 |
| LOC108167554 | 8.08E-06    | -3.046586831 | down | 3.993318871 | 7.039905701 |
| LOC108167559 | 0.000240784 | -1.037742111 | down | 4.867500222 | 5.905242333 |
| LOC108167629 | 0.000214608 | -1.641929571 | down | 3.483777886 | 5.125707458 |
| LOC108167658 | 0.001554519 | -1.003884813 | down | 3.643193605 | 4.647078418 |
| LOC108167660 | 4.32E-05    | 1.171996041  | up   | 10.73872187 | 9.566725828 |
| LOC108167667 | 0.045601482 | -1.632836477 | down | 1.542089036 | 3.174925513 |
| LOC108167675 | 0.000390185 | -1.547648884 | down | 2.209451456 | 3.757100339 |
| LOC108167718 | 0.000170976 | -1.214244557 | down | 6.128937844 | 7.343182401 |
| LOC108167732 | 0.025380986 | 1.80967965   | up   | 3.970490281 | 2.160810631 |
| LOC108167736 | 0.000509742 | -1.453529293 | down | 4.651900804 | 6.105430097 |
| LOC108167866 | 0.000212328 | -1.059977657 | down | 4.892588033 | 5.95256569  |
| LOC108167940 | 0.002655525 | -1.619552771 | down | 1.673477842 | 3.293030613 |
| LOC108167969 | 0.005596016 | 1.010986971  | up   | 4.046595732 | 3.035608761 |
| LOC108167997 | 0.017428154 | -1.383192825 | down | 2.134493705 | 3.51768653  |
| LOC108168149 | 3.30E-05    | 1.129977554  | up   | 8.103683157 | 6.973705603 |
| LOC108168268 | 2.58E-05    | -1.882523348 | down | 5.67734348  | 7.559866828 |
| LOC108168303 | 0.000978343 | -1.287999017 | down | 2.832537835 | 4.120536852 |
| LOC108168305 | 7.16E-06    | -1.473221119 | down | 5.743833342 | 7.21705446  |
| LOC108168326 | 0.001494088 | 1.010784937  | up   | 4.56566938  | 3.554884443 |
| LOC108168383 | 0.010227275 | -1.61478209  | down | 2.086218002 | 3.701000091 |
| LOC108168752 | 0.000107394 | 1.170583056  | up   | 4.906616522 | 3.736033466 |
| LOC108168775 | 0.000387004 | -1.003764236 | down | 3.8220653   | 4.825829535 |
| LOC108168890 | 0.000145521 | -1.306129997 | down | 6.717472702 | 8.023602698 |
| LOC108168938 | 4.59E-05    | -1.071067215 | down | 4.031963728 | 5.103030943 |
| LOC108169140 | 0.000334884 | -1.034356268 | down | 7.354970217 | 8.389326485 |
| LOC108169145 | 0.041372333 | -1.10667312  | down | 2.710427592 | 3.817100712 |
| LOC108169158 | 0.00062777  | 1.527274145  | up   | 7.642559283 | 6.115285139 |

|                     |             |              |      |             |             |
|---------------------|-------------|--------------|------|-------------|-------------|
| <i>Lgals1-ps2</i>   | 0.000234237 | -1.262150119 | down | 4.483117042 | 5.745267161 |
| <i>Linc-md1</i>     | 0.00011257  | 1.389995242  | up   | 7.921238404 | 6.531243162 |
| <i>Lincrd2</i>      | 0.000258548 | -1.022384437 | down | 4.269089251 | 5.291473687 |
| <i>Marcks1-ps4</i>  | 2.29E-05    | 1.444270814  | up   | 9.234495803 | 7.79022499  |
| <i>Mir199b</i>      | 0.030232364 | -1.276649746 | down | 2.352833982 | 3.629483727 |
| <i>Mir743b</i>      | 0.000342592 | -1.003021994 | down | 4.275004717 | 5.278026711 |
| <i>Mirt2</i>        | 1.15E-05    | -1.244978321 | down | 8.111734107 | 9.356712429 |
| <i>Olf1372-ps1</i>  | 0.000200521 | 1.2705422    | up   | 6.349742449 | 5.079200249 |
| <i>Pantr1</i>       | 2.03E-05    | 1.090328999  | up   | 9.656836908 | 8.56650791  |
| <i>Platr22</i>      | 0.002174771 | -1.040733847 | down | 3.459409402 | 4.500143249 |
| <i>Prkag2os1</i>    | 0.025239263 | -1.365102629 | down | 2.26926709  | 3.63436972  |
| <i>Rab11fip4os1</i> | 0.001332533 | -1.458837921 | down | 2.498375238 | 3.957213159 |
| <i>Scgb2b23-ps</i>  | 5.84E-06    | -1.063016937 | down | 6.906980308 | 7.969997244 |
| <i>Serpina3h</i>    | 3.93E-05    | 1.625899357  | up   | 7.17100033  | 5.545100973 |
| <i>Tbx3os1</i>      | 0.000310138 | -1.007875746 | down | 5.077709092 | 6.085584838 |
| <i>Tnk2os</i>       | 0.00977718  | -1.00728408  | down | 2.326654091 | 3.333938172 |
| <i>Tyms-ps</i>      | 0.001104757 | -1.12314605  | down | 3.995730868 | 5.118876918 |

---

lncRNA, long non-coding RNA; FC, fold change; P vs. C, chronic non-bacteria prostatitis vs. control

**Supplementary Table S7. Detailed clinical information of the enrolled CP/CPPS patients.**

| Parameters       | Healthy control<br>(n = 5) | CP/CPPS         |                | P-value               |
|------------------|----------------------------|-----------------|----------------|-----------------------|
|                  |                            | < 30 y (n = 11) | > 30 y (n = 9) |                       |
| Age              | 27.4 ± 0.8124              | 27.27 ± 0.6044  | 39.44 ± 1.923  | < 0.0001 <sup>#</sup> |
| EPS (white cell) | /                          | 0               | 0              | /                     |
| NIH-CPSI         | /                          | 23.36 ± 2.13    | 17.89 ± 1.328  | 0.0538 <sup>\$</sup>  |
| BMI              | 24.04 ± 0.6202             | 22.21 ± 1.079   | 23.14 ± 1.195  | 0.5755 <sup>#</sup>   |

CP/CPPS, chronic prostatitis/chronic pelvic pain syndrome; EPS, expressed prostatic secretion; NIH-CPSI, National Institutes of Health Chronic Prostatitis Symptom Index; BMI, Body Mass Index; n, number; <sup>#</sup>Ordinary one-way ANOVA analysis; <sup>\$</sup>Unpaired t-test.
